# Supplementary material for: Recurrent disruption of tumour suppressor genes in cancer by somatic mutations in cleavage and polyadenylation signals
Source: eLife. 2024 Dec 11;13:RP99040. doi: 10.7554/eLife.99040 (PMC11634062; doi:10.7554/eLife.99040)
Supplement: Supplementary file 1. — This table lists somatic DOWN-paSNVs predicted to reduce cleavage and polyadenylation efficiency across various Pan-Cancer Analysis of Whole Genomes (PCAWG) samples. For more information, please refer to the Description tab. [file elife-99040-supp1.xlsx]

## Sheet: Description
Supplementary File 1. Cancer somatic DOWN-paSNVs.
Column	Description
Mutation_ID	PCAWG mutation ID
Project_name	PCAWG project name
Ensemble_ID	Ensemble gene ID
Gene_Symbol	Gene name
PolyA_DB3_ID	PolyA_DB3 ID of the corresponding cleavage/polyadenylation signal
APARENT2_WT_Score	APARENT2 score of the wild-type cleavage/polyadenylation signal
APARENT2_MUT_Score	APARENT2 score of mutated cleavage/polyadenylation signal
APARENT2_LOR	APARENT2 log odds ratio
Chr_hg38	Chromosome ID in hg38 human genome
Pos_hg38	Nucleotide position in hg38 human genome
Reference_Allele	Reference allele sequence
Alternative_Allele	Mutated allele sequence
Census_Class	Gene classification in the v97 release of the Cancer Gene Census
Mut_Recurrence	Number of times the same mutation occurs in the PCAWG dataset
Signal_Recurrence	Number of times the same cleavage/polyadenylation signal is mutated in the PCAWG dataset

## Sheet: Supplementary File 1
Mutation_ID	Project_name	Ensemble_ID	Gene_Symbol	PolyA_DB3_ID	APARENT2_WT_Score	APARENT2_MUT_Score	APARENT2_LOR	Chr_hg38	Pos_hg38	Reference_Allele	Alternative_Allele	Census_Class	Mut_Recurrence	Signal_Recurrence
g.chr10:101465432A>C	Kidney-RCC_ICGC	ENSG00000198018	ENTPD7	chr10:101465450:+	0.424543	0.1179	-1.70832	chr10	101465432	A	C	N/A	1	1
g.chr10:102722981A>C	ColoRect-AdenoCA_TCGA	ENSG00000119906	FAM178A	chr10:102723005:+	0.332437	0.108553	-1.40843	chr10	102722981	A	C	N/A	1	1
g.chr10:103330421T>G	ColoRect-AdenoCA_TCGA	ENSG00000166169	DPCD	chr10:103330369:-	0.0566882	0.0176348	-1.20825	chr10	103330421	T	G	N/A	1	1
g.chr10:103922341A>C	Uterus-AdenoCA_TCGA	ENSG00000166197	NOLC1	chr10:103922357:+	0.391221	0.0922586	-1.84418	chr10	103922341	A	C	N/A	1	1
g.chr10:104847812A>G	Liver-HCC_ICGC	ENSG00000076685	NT5C2	chr10:104847762:-	0.475154	0.147279	-1.65664	chr10	104847812	A	G	N/A	1	1
g.chr10:105359293T>C	Biliary-AdenoCA_ICGC	ENSG00000107957	SH3PXD2A	chr10:105359260:-	0.281109	0.0746392	-1.57855	chr10	105359293	T	C	N/A	1	1
g.chr10:107024972A>C	Stomach-AdenoCA_ICGC	ENSG00000156395	SORCS3	chr10:107025000:+	0.869364	0.244849	-3.02162	chr10	107024972	A	C	N/A	1	1
g.chr10:112658886A>C	ColoRect-AdenoCA_TCGA	ENSG00000150593	PDCD4	chr10:112658905:+	0.816816	0.299916	-2.34262	chr10	112658886	A	C	N/A	1	1
g.chr10:120057458T>G	ColoRect-AdenoCA_TCGA	ENSG00000165669	FAM204A	chr10:120057442:-	0.339289	0.0999484	-1.53134	chr10	120057458	T	G	N/A	1	1
g.chr10:120065424T>C	Liver-HCC_ICGC	ENSG00000165669	FAM204A	chr10:120065401:-	0.298809	0.0865118	-1.50401	chr10	120065424	T	C	N/A	1	1
g.chr10:120435946T>A	ColoRect-AdenoCA_TCGA	ENSG00000151893	CACUL1	chr10:120435923:-	0.887083	0.0206964	-5.91817	chr10	120435946	T	A	N/A	1	1
g.chr10:120443777T>G	ColoRect-AdenoCA_TCGA	ENSG00000151893	CACUL1	chr10:120443758:-	0.316035	0.117536	-1.24392	chr10	120443777	T	G	N/A	1	1
g.chr10:120793203T>G	Liver-HCC_ICGC	ENSG00000107581	NANOS1	chr10:120793182:-	0.598798	0.260301	-1.44486	chr10	120793203	T	G	N/A	1	1
g.chr10:120794574T>C	Skin-Melanoma_TCGA	ENSG00000107581	NANOS1	chr10:120794543:-	0.805357	0.274298	-2.39305	chr10	120794574	T	C	N/A	1	1
g.chr10:120927249A>T	ColoRect-AdenoCA_TCGA	ENSG00000165672	PRDX3	chr10:120927232:-	0.622108	0.25542	-1.56842	chr10	120927249	A	T	N/A	1	1
g.chr10:121331078T>C	Lymph-BNHL_ICGC	ENSG00000151923	TIAL1	chr10:121331051:-	0.453983	0.130489	-1.71206	chr10	121331078	T	C	N/A	1	1
g.chr10:124274402T>G	ColoRect-AdenoCA_TCGA	ENSG00000166033	HTRA1	chr10:124274423:+	0.662401	0.402208	-1.07029	chr10	124274402	T	G	N/A	1	1
g.chr10:126443171T>C	Liver-HCC_ICGC	ENSG00000203791	RP11-12J10.3	chr10:126443143:-	0.457963	0.157851	-1.50576	chr10	126443171	T	C	N/A	1	1
g.chr10:126525215A>G	Liver-HCC_ICGC	ENSG00000165660	FAM175B	chr10:126525236:+	0.659094	0.244731	-1.78618	chr10	126525215	A	G	N/A	1	1
g.chr10:126674554A>C	ColoRect-AdenoCA_TCGA	ENSG00000019995	ZRANB1	chr10:126674583:+	0.341172	0.0791572	-1.79578	chr10	126674554	A	C	N/A	1	1
g.chr10:131978619A>G	Liver-HCC_ICGC	ENSG00000108010	GLRX3	chr10:131978667:+	0.575586	0.143967	-2.0874	chr10	131978619	A	G	N/A	1	1
g.chr10:13359456T>G	Skin-Melanoma_TCGA	ENSG00000086475	SEPHS1	chr10:13359465:-	0.211012	0.0397444	-1.86589	chr10	13359456	T	G	N/A	1	1
g.chr10:135156178T>A	Skin-Melanoma_ICGC	ENSG00000148803	ZNF511	chr10:135156139:-	0.454985	0.227409	-1.04245	chr10	135156178	T	A	N/A	1	1
g.chr10:13691178A>G	ColoRect-AdenoCA_TCGA	ENSG00000165630	FRMD4A	chr10:13691196:+	0.180233	0.030989	-1.92787	chr10	13691178	A	G	N/A	1	1
g.chr10:17182814T>G	ColoRect-AdenoCA_TCGA	ENSG00000107614	TRDMT1	chr10:17182798:-	0.186556	0.0777301	-1.00105	chr10	17182814	T	G	N/A	1	1
g.chr10:17279574T>G	Lymph-BNHL_TCGA	ENSG00000026025	VIM	chr10:17279592:+	0.677379	0.235908	-1.917	chr10	17279574	T	G	N/A	1	1
g.chr10:17362538T>G	ColoRect-AdenoCA_TCGA	ENSG00000148488	ST8SIA6	chr10:17362521:-	0.173245	0.0271316	-2.01675	chr10	17362538	T	G	N/A	1	2
g.chr10:17362541T>G	ColoRect-AdenoCA_TCGA	ENSG00000148488	ST8SIA6	chr10:17362521:-	0.173245	0.0261411	-2.05496	chr10	17362541	T	G	N/A	1	2
g.chr10:17632287T>A	Lung-SCC_TCGA	ENSG00000165996	PTPLA	chr10:17632272:-	0.375831	0.168302	-1.09042	chr10	17632287	T	A	N/A	1	1
g.chr10:25137569T>G	ColoRect-AdenoCA_TCGA	ENSG00000099256	PRTFDC1	chr10:25137554:-	0.852366	0.413289	-2.10367	chr10	25137569	T	G	N/A	1	1
g.chr10:27036170T>C	Liver-HCC_ICGC	ENSG00000136754	ABI1	chr10:27036152:-	0.497862	0.0289159	-3.50547	chr10	27036170	T	C	N/A	1	1
g.chr10:28909900A>C	ColoRect-AdenoCA_TCGA	ENSG00000095787	WAC	chr10:28909925:+	0.825481	0.595283	-1.16808	chr10	28909900	A	C	N/A	1	1
g.chr10:29746945T>C	Ovary-AdenoCA_ICGC	ENSG00000197321	SVIL	chr10:29746926:-	0.468248	0.0342618	-3.21168	chr10	29746945	T	C	N/A	1	1
g.chr10:30591778T>C	Liver-HCC_ICGC	ENSG00000107951	RP11-305E6.4	chr10:30591759:-	0.620158	0.22425	-1.73128	chr10	30591778	T	C	N/A	1	1
g.chr10:3181260T>A	Stomach-AdenoCA_TCGA	ENSG00000067057	PITRM1	chr10:3181278:+	0.159158	0.0147103	-2.53988	chr10	3181260	T	A	N/A	1	1
g.chr10:35927018T>G	Kidney-ChRCC_TCGA	ENSG00000177283	FZD8	chr10:35926996:-	0.119262	0.0463607	-1.0244	chr10	35927018	T	G	N/A	1	1
g.chr10:38240491T>G	Lung-SCC_TCGA	ENSG00000175395	ZNF25	chr10:38240469:-	0.15266	0.0377165	-1.52532	chr10	38240491	T	G	N/A	1	1
g.chr10:43881313T>G	ColoRect-AdenoCA_TCGA	ENSG00000169813	HNRNPF	chr10:43881363:-	0.416456	0.158228	-1.33413	chr10	43881313	T	G	N/A	1	1
g.chr10:45490139A>G	Stomach-AdenoCA_TCGA	ENSG00000107551	RASSF4	chr10:45490162:+	0.568192	0.0488076	-3.24431	chr10	45490139	A	G	N/A	1	1
g.chr10:5020127T>C	Panc-Endocrine_ICGC	ENSG00000187134	AKR1C1	chr10:5020158:+	0.419628	0.1661	-1.28922	chr10	5020127	T	C	N/A	1	1
g.chr10:50642946T>G	Stomach-AdenoCA_TCGA	N/A	RP11-123B3.2	chr10:50642927:-	0.935525	0.242165	-3.81569	chr10	50642946	T	G	N/A	1	1
g.chr10:58117836T>G	ColoRect-AdenoCA_TCGA	ENSG00000122952	ZWINT	chr10:58117818:-	0.161185	0.0280061	-1.89749	chr10	58117836	T	G	N/A	1	1
g.chr10:60166780A>G	Biliary-AdenoCA_ICGC	ENSG00000108064	TFAM	chr10:60166795:+	0.737723	0.339487	-1.69975	chr10	60166780	A	G	N/A	1	1
g.chr10:61007325A>C	ColoRect-AdenoCA_TCGA	ENSG00000165443	PHYHIPL	chr10:61007350:+	0.22991	0.0865931	-1.14714	chr10	61007325	A	C	N/A	1	1
g.chr10:63955118T>C	Eso-AdenoCa_ICGC	ENSG00000182010	RTKN2	chr10:63955099:-	0.700326	0.104236	-2.99987	chr10	63955118	T	C	N/A	1	1
g.chr10:69678116A>C	ColoRect-AdenoCA_TCGA	ENSG00000096717	SIRT1	chr10:69678143:+	0.448794	0.215021	-1.08938	chr10	69678116	A	C	N/A	1	1
g.chr10:70102013A>C	ColoRect-AdenoCA_TCGA	ENSG00000096746	HNRNPH3	chr10:70102028:+	0.881087	0.462507	-2.15302	chr10	70102013	A	C	N/A	1	1
g.chr10:70453228A>T	Panc-AdenoCA_ICGC	ENSG00000138336	TET1	chr10:70453245:+	0.305734	0.0965755	-1.41573	chr10	70453228	A	T	N/A	1	1
g.chr10:70968832A>G	Liver-HCC_ICGC	ENSG00000156502	SUPV3L1	chr10:70968849:+	0.64779	0.282013	-1.54384	chr10	70968832	A	G	N/A	1	1
g.chr10:72192221T>C	Eso-AdenoCa_ICGC	ENSG00000156574	NODAL	chr10:72192206:-	0.100243	0.00816129	-2.60563	chr10	72192221	T	C	N/A	1	1
g.chr10:73123123A>G	Panc-AdenoCA_ICGC	ENSG00000198246	SLC29A3	chr10:73123090:+	0.350284	0.103779	-1.53813	chr10	73123123	A	G	N/A	1	1
g.chr10:75391429T>G	ColoRect-AdenoCA_TCGA	ENSG00000177791	MYOZ1	chr10:75391412:-	0.320809	0.109196	-1.34892	chr10	75391429	T	G	N/A	1	1
g.chr10:75669751T>C	Panc-Endocrine_ICGC	ENSG00000222047	C10orf55	chr10:75669729:-	0.679116	0.102686	-2.91744	chr10	75669751	T	C	N/A	1	1
g.chr10:76941860A>G	ColoRect-AdenoCA_TCGA	ENSG00000156671	SAMD8	chr10:76941809:+	0.614862	0.35902	-1.04742	chr10	76941860	A	G	N/A	1	1
g.chr10:82281464A>G	Uterus-AdenoCA_TCGA	ENSG00000108219	TSPAN14	chr10:82281492:+	0.17712	0.0538435	-1.33035	chr10	82281464	A	G	N/A	1	1
g.chr10:90774840A>C	ColoRect-AdenoCA_TCGA	ENSG00000026103	FAS	chr10:90774860:+	0.582806	0.142824	-2.12634	chr10	90774840	A	C	N/A	1	1
g.chr10:90780240A>C	ColoRect-AdenoCA_TCGA	ENSG00000026103	FAS	chr10:90780258:+	0.941501	0.583362	-2.44187	chr10	90780240	A	C	N/A	1	1
g.chr10:91100418A>C	ColoRect-AdenoCA_TCGA	ENSG00000119917	IFIT3	chr10:91100434:+	0.451338	0.213498	-1.1087	chr10	91100418	A	C	N/A	1	1
g.chr10:91163724A>C	ColoRect-AdenoCA_TCGA	ENSG00000185745	IFIT1	chr10:91163740:+	0.380993	0.153391	-1.22292	chr10	91163724	A	C	N/A	1	1
g.chr10:93808416T>G	ColoRect-AdenoCA_TCGA	ENSG00000107864	CPEB3	chr10:93808397:-	0.370704	0.100912	-1.65794	chr10	93808416	T	G	N/A	1	1
g.chr10:94111277A>T	Breast-AdenoCa_TCGA	ENSG00000198060	MARCH5	chr10:94111216:+	0.204527	0.00916688	-3.32471	chr10	94111277	A	T	N/A	1	1
g.chr10:95420002T>C	Liver-HCC_ICGC	ENSG00000148690	PDE6C	chr10:95419975:-	0.880156	0.562753	-1.74157	chr10	95420002	T	C	N/A	1	1
g.chr10:96081610T>G	ColoRect-AdenoCA_TCGA	ENSG00000173145	PLCE1	chr10:96081585:-	0.308234	0.136752	-1.03415	chr10	96081610	T	G	N/A	1	1
g.chr10:96088457A>G	ColoRect-AdenoCA_TCGA	ENSG00000138193	PLCE1	chr10:96088477:+	0.514261	0.138954	-1.88107	chr10	96088457	A	G	N/A	1	1
g.chr10:96293133A>C	ColoRect-AdenoCA_TCGA	ENSG00000108239	TBC1D12	chr10:96293157:+	0.508708	0.227779	-1.25573	chr10	96293133	A	C	N/A	1	1
g.chr10:96373640A>G	Ovary-AdenoCA_ICGC	ENSG00000119969	RP11-119K6.6	chr10:96373662:+	0.774134	0.216452	-2.51827	chr10	96373640	A	G	N/A	1	2
g.chr10:96373642A>C	Prost-AdenoCA_ICGC	ENSG00000119969	RP11-119K6.6	chr10:96373662:+	0.774134	0.113481	-3.28747	chr10	96373642	A	C	N/A	1	2
g.chr10:98746882A>C	ColoRect-AdenoCA_TCGA	ENSG00000196233	C10orf12	chr10:98746938:+	0.259512	0.0652638	-1.61332	chr10	98746882	A	C	N/A	1	1
g.chr10:99196018T>C	Skin-Melanoma_ICGC	ENSG00000171311	EXOSC1	chr10:99195998:-	0.600433	0.212101	-1.71958	chr10	99196018	T	C	N/A	1	1
g.chr10:99627768A>G	ColoRect-AdenoCA_TCGA	ENSG00000155265	GOLGA7B	chr10:99627782:+	0.193246	0.0556426	-1.4025	chr10	99627768	A	G	N/A	1	1
g.chr10:99630364A>G	ColoRect-AdenoCA_TCGA	ENSG00000155265	CRTAC1	chr10:99630408:+	0.43721	0.110927	-1.82882	chr10	99630364	A	G	N/A	1	1
g.chr11:1012841T>A	Skin-Melanoma_TCGA	ENSG00000184956	MUC6	chr11:1012823:-	0.230234	0.0261705	-2.40961	chr11	1012841	T	A	N/A	1	1
g.chr11:101955197A>T	Liver-HCC_TCGA	ENSG00000137691	C11orf70	chr11:101955217:+	0.213507	0.061518	-1.42102	chr11	101955197	A	T	N/A	1	1
g.chr11:102706558T>C	Liver-HCC_ICGC	ENSG00000149968	MMP3	chr11:102706537:-	0.733284	0.164	-2.64011	chr11	102706558	T	C	N/A	1	1
g.chr11:10579897T>C	Kidney-RCC_ICGC	ENSG00000133800	LYVE1	chr11:10579877:-	0.632056	0.299551	-1.39049	chr11	10579897	T	C	N/A	1	1
g.chr11:107182876T>A	Bladder-TCC_TCGA	ENSG00000152404	RP11-819C21.1	chr11:107182857:-	0.466187	0.175126	-1.41426	chr11	107182876	T	A	N/A	1	1
g.chr11:107977179A>T	Prost-AdenoCA_ICGC	ENSG00000166266	CUL5	chr11:107977204:+	0.360765	0.127565	-1.35062	chr11	107977179	A	T	N/A	1	1
g.chr11:10818616T>C	Lymph-BNHL_ICGC	ENSG00000110321	EIF4G2	chr11:10818574:-	0.785621	0.121385	-3.2781	chr11	10818616	T	C	N/A	1	1
g.chr11:108240221A>G	ColoRect-AdenoCA_TCGA	ENSG00000149311	ATM	chr11:108240237:+	0.35624	0.148201	-1.15706	chr11	108240221	A	G	tsg	1	1
g.chr11:111934960A>G	Ovary-AdenoCA_ICGC	ENSG00000150768	DLAT	chr11:111934981:+	0.562818	0.317637	-1.01726	chr11	111934960	A	G	N/A	1	1
g.chr11:112091051A>C	ColoRect-AdenoCA_TCGA	ENSG00000197580	BCO2	chr11:112091065:+	0.13485	0.0460425	-1.17231	chr11	112091051	A	C	N/A	1	1
g.chr11:118033540A>C	Ovary-AdenoCA_ICGC	ENSG00000149575	SCN2B	chr11:118033521:-	0.946333	0.163899	-4.4993	chr11	118033540	A	C	N/A	1	1
g.chr11:118967062T>G	ColoRect-AdenoCA_TCGA	ENSG00000172269	H2AFX	chr11:118967047:-	0.121018	0.0169954	-2.07485	chr11	118967062	T	G	N/A	1	1
g.chr11:120357321A>G	Liver-HCC_ICGC	ENSG00000196914	ARHGEF12	chr11:120357350:+	0.441437	0.086305	-2.12428	chr11	120357321	A	G	N/A	1	1
g.chr11:121986127T>G	Stomach-AdenoCA_TCGA	ENSG00000259571	BLID	chr11:121986108:-	0.658532	0.29572	-1.52452	chr11	121986127	T	G	N/A	1	1
g.chr11:124751346A>C	ColoRect-AdenoCA_TCGA	ENSG00000154134	ROBO3	chr11:124751340:+	0.833127	0.164422	-3.23365	chr11	124751346	A	C	N/A	1	1
g.chr11:124960396A>T	ColoRect-AdenoCA_TCGA	ENSG00000134955	SLC37A2	chr11:124960412:+	0.394444	0.129162	-1.47972	chr11	124960396	A	T	N/A	1	1
g.chr11:128791040A>C	ColoRect-AdenoCA_TCGA	ENSG00000120457	KCNJ5	chr11:128791058:+	0.313138	0.0622115	-1.92749	chr11	128791040	A	C	N/A	1	1
g.chr11:132284893T>G	ColoRect-AdenoCA_TCGA	ENSG00000183715	OPCML	chr11:132284875:-	0.604837	0.171832	-1.99836	chr11	132284893	T	G	N/A	1	2
g.chr11:132284896T>C	Liver-HCC_ICGC	ENSG00000183715	OPCML	chr11:132284875:-	0.604837	0.224727	-1.66399	chr11	132284896	T	C	N/A	1	2
g.chr11:132288098A>G	ColoRect-AdenoCA_TCGA	ENSG00000183715	OPCML	chr11:132288076:-	0.609825	0.0587852	-3.21986	chr11	132288098	A	G	N/A	1	1
g.chr11:18251295T>G	ColoRect-AdenoCA_TCGA	ENSG00000255071	SAA4	chr11:18251274:-	0.151848	0.0338447	-1.63136	chr11	18251295	T	G	N/A	1	1
g.chr11:18630838T>G	ColoRect-AdenoCA_TCGA	ENSG00000179119	SPTY2D1	chr11:18630822:-	0.510223	0.186683	-1.5126	chr11	18630838	T	G	N/A	1	1
g.chr11:19245971T>G	Liver-HCC_ICGC	ENSG00000129173	E2F8	chr11:19245951:-	0.570335	0.234093	-1.46856	chr11	19245971	T	G	N/A	1	1
g.chr11:20533223T>C	Kidney-RCC_TCGA	ENSG00000185238	PRMT3	chr11:20533243:+	0.162641	0.0457881	-1.39815	chr11	20533223	T	C	N/A	1	1
g.chr11:21596985A>G	Liver-HCC_ICGC	ENSG00000165973	NELL1	chr11:21597001:+	0.340397	0.0597912	-2.09372	chr11	21596985	A	G	N/A	1	1
g.chr11:27518694T>A	ColoRect-AdenoCA_TCGA	ENSG00000148943	LIN7C	chr11:27518669:-	0.488833	0.0774419	-2.43295	chr11	27518694	T	A	N/A	1	1
g.chr11:28042561T>C	ColoRect-AdenoCA_TCGA	ENSG00000121621	KIF18A	chr11:28042546:-	0.647863	0.317789	-1.37361	chr11	28042561	T	C	N/A	1	1
g.chr11:28357141T>C	Skin-Melanoma_TCGA	ENSG00000169519	METTL15	chr11:28357163:+	0.274276	0.0229402	-2.77862	chr11	28357141	T	C	N/A	1	1
g.chr11:2965687T>C	Liver-HCC_ICGC	ENSG00000205531	NAP1L4	chr11:2965667:-	0.525605	0.0870613	-2.45257	chr11	2965687	T	C	N/A	1	1
g.chr11:31806232T>A	ColoRect-AdenoCA_TCGA	ENSG00000007372	ELP4	chr11:31806145:-	0.537373	0.251523	-1.24028	chr11	31806232	T	A	N/A	1	1
g.chr11:32879272A>C	ColoRect-AdenoCA_TCGA	ENSG00000135378	PRRG4	chr11:32879286:+	0.282139	0.0894707	-1.38624	chr11	32879272	A	C	N/A	1	1
g.chr11:36506127T>G	Skin-Melanoma_TCGA	ENSG00000175104	TRAF6	chr11:36506109:-	0.221534	0.0806614	-1.17665	chr11	36506127	T	G	N/A	1	1
g.chr11:43882859A>G	Liver-HCC_ICGC	ENSG00000149084	RP11-613D13.5	chr11:43882896:+	0.547305	0.160378	-1.84521	chr11	43882859	A	G	N/A	1	1
g.chr11:46623268T>C	Panc-AdenoCA_ICGC	ENSG00000180423	HARBI1	chr11:46623246:-	0.170757	0.0642564	-1.09819	chr11	46623268	T	C	N/A	1	1
g.chr11:47593768T>G	Liver-HCC_ICGC	ENSG00000123444	KBTBD4	chr11:47593749:-	0.725078	0.323203	-1.70888	chr11	47593768	T	G	N/A	1	1
g.chr11:47626154T>G	Lung-SCC_TCGA	ENSG00000109919	MTCH2	chr11:47626126:-	0.266415	0.115242	-1.02539	chr11	47626154	T	G	N/A	1	1
g.chr11:5634164A>G	ColoRect-AdenoCA_TCGA	ENSG00000121236	TRIM6	chr11:5634182:+	0.745342	0.431303	-1.35046	chr11	5634164	A	G	N/A	1	1
g.chr11:57412582A>G	Biliary-AdenoCA_ICGC	ENSG00000166793	YPEL4	chr11:57412560:-	0.661391	0.158592	-2.33824	chr11	57412582	A	G	N/A	1	1
g.chr11:58895832A>C	ColoRect-AdenoCA_TCGA	ENSG00000189057	FAM111B	chr11:58895853:+	0.261354	0.0439618	-2.04053	chr11	58895832	A	C	N/A	1	1
g.chr11:61664792T>G	ColoRect-AdenoCA_TCGA	ENSG00000167994	RAB3IL1	chr11:61664773:-	0.335844	0.0229925	-3.06746	chr11	61664792	T	G	N/A	1	1
g.chr11:61919784A>C	ColoRect-AdenoCA_TCGA	ENSG00000149503	INCENP	chr11:61919798:+	0.387917	0.017539	-3.56956	chr11	61919784	A	C	N/A	1	1
g.chr11:62554795A>G	Breast-AdenoCa_ICGC	ENSG00000162227	TAF6L	chr11:62554814:+	0.105197	0.024157	-1.55796	chr11	62554795	A	G	N/A	1	1
g.chr11:63597400A>G	Stomach-AdenoCA_TCGA	ENSG00000168005	C11orf84	chr11:63597426:+	0.76793	0.168298	-2.7944	chr11	63597400	A	G	N/A	1	1
g.chr11:64124983T>C	CNS-GBM_TCGA	ENSG00000168071	CCDC88B	chr11:64124997:+	0.244706	0.018591	-2.83926	chr11	64124983	T	C	N/A	1	1
g.chr11:64812276A>G	Liver-HCC_ICGC	ENSG00000168061	NAALADL1	chr11:64812300:+	0.851395	0.379461	-2.23742	chr11	64812276	A	G	N/A	1	1
g.chr11:64879164A>T	Lung-SCC_TCGA	ENSG00000149823	VPS51	chr11:64879151:+	0.0604617	0.0119352	-1.67287	chr11	64879164	A	T	N/A	1	1
g.chr11:65306160T>C	Liver-HCC_ICGC	ENSG00000142186	SCYL1	chr11:65306175:+	0.184099	0.0214819	-2.33001	chr11	65306160	T	C	N/A	1	1
g.chr11:65482490A>T	Skin-Melanoma_TCGA	ENSG00000172922	KAT5	chr11:65482440:-	0.0960707	0.00401756	-3.27139	chr11	65482490	A	T	N/A	1	1
g.chr11:65668360A>C	ColoRect-AdenoCA_TCGA	ENSG00000175602	FOSL1	chr11:65668383:+	0.388181	0.12452	-1.49534	chr11	65668360	A	C	N/A	1	1
g.chr11:6609678T>G	ColoRect-AdenoCA_TCGA	ENSG00000132275	RRP8	chr11:6609654:-	0.219206	0.0850821	-1.10492	chr11	6609678	T	G	N/A	1	1
g.chr11:66288115T>C	Biliary-AdenoCA_ICGC	ENSG00000174165	BBS1	chr11:66288096:-	0.461941	0.105662	-1.98331	chr11	66288115	T	C	N/A	1	1
g.chr11:66602056A>G	ColoRect-AdenoCA_TCGA	ENSG00000173599	C11orf80	chr11:66602023:-	0.606279	0.187504	-1.89801	chr11	66602056	A	G	N/A	1	1
g.chr11:67081452A>C	Kidney-RCC_ICGC	ENSG00000172830	SSH3	chr11:67081469:+	0.336267	0.0824737	-1.72923	chr11	67081452	A	C	N/A	1	1
g.chr11:67165672T>G	Skin-Melanoma_ICGC	ENSG00000172531	RAD9A	chr11:67165654:-	0.116911	0.0046337	-3.34774	chr11	67165672	T	G	N/A	1	1
g.chr11:67354107A>C	ColoRect-AdenoCA_TCGA	ENSG00000084207	GSTP1	chr11:67354124:+	0.656825	0.24358	-1.78233	chr11	67354107	A	C	N/A	1	1
g.chr11:68028823T>C	Eso-AdenoCa_ICGC	ENSG00000171067	C11orf24	chr11:68028806:-	0.301791	0.00268718	-5.07779	chr11	68028823	T	C	N/A	1	1
g.chr11:72465794T>C	Liver-HCC_ICGC	ENSG00000214530	STARD10	chr11:72465774:-	0.106546	0.0179837	-1.87362	chr11	72465794	T	C	N/A	1	1
g.chr11:73107671A>G	Lymph-BNHL_ICGC	ENSG00000054967	RELT	chr11:73107690:+	0.554354	0.0478188	-3.20962	chr11	73107671	A	G	N/A	1	1
g.chr11:73119463A>C	ColoRect-AdenoCA_TCGA	ENSG00000054967	FAM168A	chr11:73119481:+	0.515031	0.109471	-2.15629	chr11	73119463	A	C	N/A	1	1
g.chr11:73970828T>G	ColoRect-AdenoCA_TCGA	ENSG00000149380	P4HA3	chr11:73970812:-	0.15079	0.054361	-1.1278	chr11	73970828	T	G	N/A	1	1
g.chr11:74695079A>C	ColoRect-AdenoCA_TCGA	ENSG00000118363	SPCS2	chr11:74695094:+	0.824844	0.590413	-1.18384	chr11	74695079	A	C	N/A	1	1
g.chr11:75133328A>C	ColoRect-AdenoCA_TCGA	ENSG00000149273	RPS3	chr11:75133310:+	0.115927	0.0292726	-1.46982	chr11	75133328	A	C	N/A	1	1
g.chr11:75283809A>G	Lymph-CLL_ICGC	ENSG00000149257	SERPINH1	chr11:75283862:+	0.75039	0.189324	-2.5551	chr11	75283809	A	G	N/A	1	1
g.chr11:75853678A>T	Lymph-BNHL_ICGC	ENSG00000198382	UVRAG	chr11:75853695:+	0.530212	0.213652	-1.42405	chr11	75853678	A	T	N/A	1	1
g.chr11:76837182A>C	ColoRect-AdenoCA_TCGA	ENSG00000149260	CAPN5	chr11:76837201:+	0.885355	0.359306	-2.62252	chr11	76837182	A	C	N/A	1	1
g.chr11:77319743T>G	ColoRect-AdenoCA_TCGA	ENSG00000074201	AQP11	chr11:77319725:-	0.528857	0.1357	-1.96703	chr11	77319743	T	G	N/A	1	1
g.chr11:82689159A>G	Uterus-AdenoCA_TCGA	ENSG00000137502	RAB30	chr11:82689141:-	0.378251	0.0236744	-3.22243	chr11	82689159	A	G	N/A	1	1
g.chr11:82690336T>G	Liver-HCC_ICGC	ENSG00000137502	RAB30	chr11:82690310:-	0.699222	0.249527	-1.94473	chr11	82690336	T	G	N/A	1	1
g.chr11:82896816A>C	Liver-HCC_ICGC	ENSG00000165494	PCF11	chr11:82896836:+	0.640913	0.147029	-2.33742	chr11	82896816	A	C	N/A	1	1
g.chr11:82970152T>C	Liver-HCC_ICGC	ENSG00000137500	CCDC90B	chr11:82970134:-	0.319446	0.0973947	-1.47019	chr11	82970152	T	C	N/A	1	1
g.chr11:85668645T>C	Stomach-AdenoCA_ICGC	ENSG00000073921	PICALM	chr11:85668622:-	0.349017	0.0954946	-1.62496	chr11	85668645	T	C	fusion	1	1
g.chr11:85990834A>T	Breast-AdenoCa_TCGA	ENSG00000074266	EED	chr11:85990853:+	0.495721	0.116486	-2.00902	chr11	85990834	A	T	tsg	1	1
g.chr11:8723101A>G	Liver-HCC_TCGA	ENSG00000166441	ST5	chr11:8723126:+	0.881397	0.0653249	-4.66655	chr11	8723101	A	G	N/A	1	1
g.chr11:92877355T>G	ColoRect-AdenoCA_TCGA	ENSG00000180773	SLC36A4	chr11:92877340:-	0.823134	0.237819	-2.7024	chr11	92877355	T	G	N/A	1	1
g.chr11:93496234A>C	ColoRect-AdenoCA_TCGA	ENSG00000182919	C11orf54	chr11:93496250:+	0.541853	0.164423	-1.79349	chr11	93496234	A	C	N/A	1	1
g.chr11:94151398T>G	ColoRect-AdenoCA_TCGA	ENSG00000020922	MRE11A	chr11:94151379:-	0.428933	0.17033	-1.29708	chr11	94151398	T	G	N/A	1	1
g.chr11:9469342A>G	Liver-HCC_TCGA	ENSG00000205339	IPO7	chr11:9469377:+	0.47329	0.243398	-1.0272	chr11	9469342	A	G	N/A	1	1
g.chr11:96126402A>C	ColoRect-AdenoCA_TCGA	ENSG00000183340	JRKL	chr11:96126421:+	0.762674	0.309052	-1.97196	chr11	96126402	A	C	N/A	1	1
g.chr12:101022050A>T	Liver-HCC_ICGC	ENSG00000139354	GAS2L3	chr12:101022064:+	0.863247	0.194541	-3.2633	chr12	101022050	A	T	N/A	1	1
g.chr12:103232335T>G	ColoRect-AdenoCA_TCGA	ENSG00000171759	PAH	chr12:103232312:-	0.784918	0.388361	-1.74877	chr12	103232335	T	G	N/A	1	2
g.chr12:103232338T>C	Liver-HCC_ICGC	ENSG00000171759	PAH	chr12:103232312:-	0.784918	0.423212	-1.60416	chr12	103232338	T	C	N/A	1	2
g.chr12:103354265A>C	ColoRect-AdenoCA_TCGA	ENSG00000139352	ASCL1	chr12:103354291:+	0.699441	0.244541	-1.97258	chr12	103354265	A	C	N/A	1	1
g.chr12:104157120T>G	ColoRect-AdenoCA_TCGA	ENSG00000111696	STAB2	chr12:104157105:-	0.616524	0.0932095	-2.74988	chr12	104157120	T	G	N/A	1	1
g.chr12:106631682T>C	Liver-HCC_ICGC	ENSG00000136026	CKAP4	chr12:106631659:-	0.771669	0.325891	-1.94459	chr12	106631682	T	C	N/A	1	1
g.chr12:107156566A>C	ColoRect-AdenoCA_TCGA	ENSG00000111783	RFX4	chr12:107156581:+	0.981346	0.731447	-2.96092	chr12	107156566	A	C	N/A	1	1
g.chr12:107281043A>G	Liver-HCC_ICGC	ENSG00000111785	RIC8B	chr12:107281062:+	0.956053	0.827026	-1.51512	chr12	107281043	A	G	N/A	1	1
g.chr12:10753355T>C	Lung-SCC_TCGA	ENSG00000111196	KLRAP1	chr12:10753334:-	0.211115	0.0754141	-1.18813	chr12	10753355	T	C	N/A	1	1
g.chr12:110971071T>C	Liver-HCC_ICGC	ENSG00000196850	PPTC7	chr12:110971050:-	0.917588	0.777453	-1.15912	chr12	110971071	T	C	N/A	1	1
g.chr12:112464165T>G	ColoRect-AdenoCA_TCGA	ENSG00000111300	NAA25	chr12:112464146:-	0.235946	0.0768944	-1.31028	chr12	112464165	T	G	N/A	1	1
g.chr12:11325708A>G	Liver-HCC_ICGC	ENSG00000256537	TAS2R14	chr12:11325736:+	0.20459	0.0446104	-1.7063	chr12	11325708	A	G	N/A	1	1
g.chr12:113876066A>G	ColoRect-AdenoCA_TCGA	ENSG00000139410	SDSL	chr12:113876081:+	0.138985	0.0195865	-2.08938	chr12	113876066	A	G	N/A	1	1
g.chr12:117293969T>G	ColoRect-AdenoCA_TCGA	ENSG00000135116	HRK	chr12:117293949:-	0.792751	0.190721	-2.78692	chr12	117293969	T	G	N/A	1	1
g.chr12:12048315A>T	ColoRect-AdenoCA_TCGA	ENSG00000139083	ETV6	chr12:12048336:+	0.817432	0.502044	-1.49087	chr12	12048315	A	T	tsg	1	1
g.chr12:120878337A>G	Liver-HCC_TCGA	ENSG00000111775	COX6A1	chr12:120878402:+	0.0725482	0.00627121	-2.51731	chr12	120878337	A	G	N/A	1	1
g.chr12:121677659T>C	ColoRect-AdenoCA_TCGA	ENSG00000110931	CAMKK2	chr12:121677630:-	0.599722	0.218972	-1.67597	chr12	121677659	T	C	N/A	1	1
g.chr12:123353779A>G	Eso-AdenoCa_ICGC	ENSG00000130787	VPS37B	chr12:123353802:+	0.684451	0.0515875	-3.68581	chr12	123353779	A	G	N/A	1	1
g.chr12:124145816A>C	Panc-AdenoCA_ICGC	ENSG00000111358	GTF2H3	chr12:124145838:+	0.735298	0.228673	-2.23749	chr12	124145816	A	C	N/A	1	1
g.chr12:124245908A>C	ColoRect-AdenoCA_TCGA	ENSG00000185344	ATP6V0A2	chr12:124245930:+	0.639027	0.21223	-1.88268	chr12	124245908	A	C	N/A	2	2
g.chr12:124245908A>C	ColoRect-AdenoCA_TCGA	ENSG00000185344	ATP6V0A2	chr12:124245930:+	0.639027	0.21223	-1.88268	chr12	124245908	A	C	N/A	2	2
g.chr12:125394621T>C	Skin-Melanoma_TCGA	ENSG00000150991	UBC	chr12:125394602:-	0.220274	0.0311735	-2.17245	chr12	125394621	T	C	N/A	1	1
g.chr12:12802632A>C	Liver-HCC_ICGC	ENSG00000111269	CREBL2	chr12:12802648:+	0.629342	0.0464462	-3.5513	chr12	12802632	A	C	N/A	1	1
g.chr12:130880696T>G	ColoRect-AdenoCA_TCGA	ENSG00000060709	RIMBP2	chr12:130880678:-	0.779281	0.186535	-2.73416	chr12	130880696	T	G	N/A	1	1
g.chr12:132407679A>C	Head-SCC_TCGA	ENSG00000177169	ULK1	chr12:132407632:+	0.30097	0.0180684	-3.15267	chr12	132407679	A	C	N/A	1	1
g.chr12:133281547A>G	Stomach-AdenoCA_TCGA	ENSG00000176894	PXMP2	chr12:133281615:+	0.240114	0.0654114	-1.50735	chr12	133281547	A	G	N/A	1	1
g.chr12:13693205A>C	Skin-Melanoma_TCGA	ENSG00000273079	GRIN2B	chr12:13693168:-	0.487994	0.222943	-1.20056	chr12	13693205	A	C	N/A	1	1
g.chr12:14655845T>G	Skin-Melanoma_ICGC	ENSG00000171681	PLBD1	chr12:14655864:+	0.873439	0.261026	-2.97235	chr12	14655845	T	G	N/A	1	1
g.chr12:14930917T>G	ColoRect-AdenoCA_TCGA	ENSG00000246705	H2AFJ	chr12:14930936:+	0.910068	0.721323	-1.36343	chr12	14930917	T	G	N/A	1	1
g.chr12:1895413A>C	ColoRect-AdenoCA_TCGA	ENSG00000006831	ADIPOR2	chr12:1895459:+	0.165514	0.0389908	-1.5869	chr12	1895413	A	C	N/A	1	2
g.chr12:1895417A>T	Head-SCC_TCGA	ENSG00000006831	ADIPOR2	chr12:1895459:+	0.165514	0.0326546	-1.77081	chr12	1895417	A	T	N/A	1	2
g.chr12:22346679T>C	Liver-HCC_ICGC	ENSG00000111728	ST8SIA1	chr12:22346641:-	0.486174	0.249242	-1.04734	chr12	22346679	T	C	N/A	1	1
g.chr12:23680882T>G	ColoRect-AdenoCA_TCGA	ENSG00000134532	SOX5	chr12:23680863:-	0.632622	0.150431	-2.2747	chr12	23680882	T	G	N/A	1	1
g.chr12:23682463T>C	ColoRect-AdenoCA_TCGA	ENSG00000134532	SOX5	chr12:23682438:-	0.659589	0.176096	-2.20449	chr12	23682463	T	C	N/A	1	1
g.chr12:24966487T>G	ColoRect-AdenoCA_TCGA	ENSG00000060982	BCAT1	chr12:24966473:-	0.489605	0.243166	-1.09381	chr12	24966487	T	G	N/A	1	1
g.chr12:26490555T>C	Kidney-RCC_TCGA	ENSG00000123104	ITPR2	chr12:26490540:-	0.391722	0.102106	-1.73396	chr12	26490555	T	C	N/A	1	1
g.chr12:32531709A>G	Prost-AdenoCA_ICGC	ENSG00000151746	BICD1	chr12:32531743:+	0.279164	0.104404	-1.20061	chr12	32531709	A	G	N/A	1	1
g.chr12:32944782T>C	Uterus-AdenoCA_TCGA	ENSG00000057294	PKP2	chr12:32944767:-	0.461152	0.0891221	-2.16869	chr12	32944782	T	C	N/A	1	1
g.chr12:34184144A>C	ColoRect-AdenoCA_TCGA	ENSG00000139133	ALG10	chr12:34184166:+	0.553728	0.158057	-1.8885	chr12	34184144	A	C	N/A	1	1
g.chr12:34189020A>C	ColoRect-AdenoCA_TCGA	ENSG00000139133	RP11-847H18.2	chr12:34189037:+	0.569186	0.107918	-2.39072	chr12	34189020	A	C	N/A	1	1
g.chr12:39046175T>G	ColoRect-AdenoCA_TCGA	ENSG00000139117	CPNE8	chr12:39046160:-	0.800849	0.166725	-3.00062	chr12	39046175	T	G	N/A	1	1
g.chr12:41464029A>G	Liver-HCC_ICGC	ENSG00000018236	CNTN1	chr12:41464093:+	0.495478	0.090328	-2.29155	chr12	41464029	A	G	N/A	1	1
g.chr12:42554395T>G	Breast-AdenoCa_ICGC	ENSG00000015153	YAF2	chr12:42554375:-	0.358321	0.119452	-1.41497	chr12	42554395	T	G	N/A	1	1
g.chr12:46301802A>G	Uterus-AdenoCA_TCGA	ENSG00000189079	ARID2	chr12:46301820:+	0.878165	0.109949	-4.06643	chr12	46301802	A	G	tsg	1	1
g.chr12:46309803T>A	Cervix-AdenoCA_TCGA	ENSG00000139218	SCAF11	chr12:46309785:-	0.565478	0.113203	-2.32186	chr12	46309803	T	A	N/A	1	1
g.chr12:46582040A>G	ColoRect-AdenoCA_TCGA	ENSG00000111371	SLC38A1	chr12:46582012:-	0.153161	0.0537502	-1.15814	chr12	46582040	A	G	N/A	1	1
g.chr12:4668773A>C	ColoRect-AdenoCA_TCGA	ENSG00000111247	RAD51AP1	chr12:4668791:+	0.660823	0.172588	-2.23436	chr12	4668773	A	C	N/A	1	1
g.chr12:46752655A>G	Uterus-AdenoCA_TCGA	ENSG00000134294	SLC38A2	chr12:46752632:-	0.474366	0.171228	-1.47432	chr12	46752655	A	G	N/A	1	1
g.chr12:47158565T>C	Liver-HCC_ICGC	ENSG00000139209	SLC38A4	chr12:47158545:-	0.891001	0.460225	-2.26045	chr12	47158565	T	C	N/A	1	1
g.chr12:48362254A>C	ColoRect-AdenoCA_TCGA	ENSG00000134291	TMEM106C	chr12:48362271:+	0.638784	0.075066	-3.08145	chr12	48362254	A	C	N/A	1	1
g.chr12:48541588T>G	Lung-AdenoCA_TCGA	ENSG00000177981	ASB8	chr12:48541572:-	0.575722	0.268014	-1.30996	chr12	48541588	T	G	N/A	1	1
g.chr12:48729297T>C	ColoRect-AdenoCA_TCGA	ENSG00000167528	ZNF641	chr12:48729274:-	0.420616	0.158951	-1.34581	chr12	48729297	T	C	N/A	1	1
g.chr12:48733828T>A	Liver-HCC_ICGC	ENSG00000167528	ZNF641	chr12:48733770:-	0.323839	0.0606586	-2.00373	chr12	48733828	T	A	N/A	1	1
g.chr12:49321676T>C	Lung-AdenoCA_TCGA	ENSG00000134287	FKBP11	chr12:49321624:-	0.192387	0.0187136	-2.52504	chr12	49321676	T	C	N/A	1	1
g.chr12:49965613A>C	ColoRect-AdenoCA_TCGA	ENSG00000135519	KCNH3	chr12:49965631:+	0.433236	0.123343	-1.69249	chr12	49965613	A	C	N/A	1	1
g.chr12:50033723T>G	ColoRect-AdenoCA_TCGA	ENSG00000161791	PRPF40B	chr12:50033706:-	0.450418	0.151213	-1.52613	chr12	50033723	T	G	N/A	1	1
g.chr12:50260700A>G	ColoRect-AdenoCA_TCGA	ENSG00000135472	FAIM2	chr12:50260679:-	0.481744	0.0998693	-2.12562	chr12	50260700	A	G	N/A	1	1
g.chr12:50494408A>T	Kidney-RCC_TCGA	ENSG00000066117	SMARCD1	chr12:50494490:+	0.348655	0.147145	-1.13222	chr12	50494408	A	T	tsg	1	1
g.chr12:51326033A>C	ColoRect-AdenoCA_TCGA	ENSG00000185432	METTL7A	chr12:51326059:+	0.420722	0.160776	-1.33265	chr12	51326033	A	C	N/A	1	1
g.chr12:51373584T>G	ColoRect-AdenoCA_TCGA	ENSG00000110911	SLC11A2	chr12:51373567:-	0.950054	0.580863	-2.61926	chr12	51373584	T	G	N/A	1	1
g.chr12:52203502T>G	ColoRect-AdenoCA_TCGA	ENSG00000261308	SCN8A	chr12:52203486:-	0.404426	0.179656	-1.13162	chr12	52203502	T	G	N/A	1	1
g.chr12:52563335A>T	Lymph-CLL_ICGC	ENSG00000167767	KRT80	chr12:52563307:-	0.724758	0.0269135	-4.55603	chr12	52563335	A	T	N/A	1	1
g.chr12:53290996T>C	Skin-Melanoma_ICGC	ENSG00000170421	KRT8	chr12:53290975:-	0.567816	0.0834012	-2.66995	chr12	53290996	T	C	N/A	1	1
g.chr12:53808539A>C	ColoRect-AdenoCA_TCGA	ENSG00000185591	SP1	chr12:53808553:+	0.455473	0.202753	-1.1906	chr12	53808539	A	C	N/A	1	1
g.chr12:53810210A>C	Lymph-BNHL_ICGC	ENSG00000185591	SP1	chr12:53810256:+	0.759526	0.366766	-1.6962	chr12	53810210	A	C	N/A	1	1
g.chr12:53844479A>C	ColoRect-AdenoCA_TCGA	ENSG00000205352	PCBP2	chr12:53844498:+	0.240078	0.0953567	-1.09766	chr12	53844479	A	C	N/A	1	1
g.chr12:54568795T>A	Liver-HCC_ICGC	ENSG00000123415	SMUG1	chr12:54568781:-	0.147149	0.046836	-1.256	chr12	54568795	T	A	N/A	1	1
g.chr12:54630005T>G	Bone-Leiomyo_TCGA	ENSG00000094916	CBX5	chr12:54629961:-	0.387636	0.10435	-1.69254	chr12	54630005	T	G	N/A	1	1
g.chr12:54973008A>C	ColoRect-AdenoCA_TCGA	ENSG00000123360	PDE1B	chr12:54973023:+	0.370068	0.0666594	-2.10725	chr12	54973008	A	C	N/A	1	1
g.chr12:56432201A>G	ColoRect-AdenoCA_TCGA	ENSG00000123411	IKZF4	chr12:56432219:+	0.936098	0.39892	-3.09434	chr12	56432201	A	G	N/A	1	1
g.chr12:56551744T>C	Head-SCC_ICGC	ENSG00000196465	MYL6B	chr12:56551725:+	0.220815	0.0174499	-2.76989	chr12	56551744	T	C	N/A	1	1
g.chr12:5667761T>C	Kidney-RCC_ICGC	ENSG00000047617	ANO2	chr12:5667727:-	0.493819	0.123011	-1.9395	chr12	5667761	T	C	N/A	1	1
g.chr12:56873201A>G	Skin-Melanoma_ICGC	ENSG00000176422	GLS2	chr12:56873214:+	0.25498	0.0927394	-1.20841	chr12	56873201	A	G	N/A	1	1
g.chr12:58350900A>C	ColoRect-AdenoCA_TCGA	ENSG00000166896	XRCC6BP1	chr12:58350924:+	0.734622	0.367848	-1.55966	chr12	58350900	A	C	N/A	1	1
g.chr12:60181465A>C	ColoRect-AdenoCA_TCGA	ENSG00000118596	SLC16A7	chr12:60181482:+	0.649647	0.212978	-1.92456	chr12	60181465	A	C	N/A	1	1
g.chr12:62798407A>G	Stomach-AdenoCA_TCGA	ENSG00000135655	USP15	chr12:62798423:+	0.598651	0.289562	-1.29736	chr12	62798407	A	G	N/A	1	1
g.chr12:64660779T>G	ColoRect-AdenoCA_TCGA	ENSG00000185306	C12orf56	chr12:64660754:-	0.788474	0.475341	-1.41447	chr12	64660779	T	G	N/A	1	1
g.chr12:65641016A>C	ColoRect-AdenoCA_TCGA	ENSG00000174106	LEMD3	chr12:65641042:+	0.543087	0.173596	-1.73313	chr12	65641016	A	C	N/A	1	1
g.chr12:65860667T>A	CNS-Medullo_ICGC	ENSG00000174099	MSRB3	chr12:65860687:+	0.712304	0.358166	-1.48993	chr12	65860667	T	A	N/A	1	1
g.chr12:66530734A>G	ColoRect-AdenoCA_TCGA	ENSG00000155957	TMBIM4	chr12:66530717:-	0.416207	0.158457	-1.33139	chr12	66530734	A	G	N/A	1	1
g.chr12:69244445A>C	ColoRect-AdenoCA_TCGA	ENSG00000135679	CPM	chr12:69244466:+	0.564526	0.121831	-2.23475	chr12	69244445	A	C	oncogene	1	1
g.chr12:69972832A>G	Skin-Melanoma_TCGA	ENSG00000166225	FRS2	chr12:69972852:+	0.374143	0.173588	-1.04592	chr12	69972832	A	G	N/A	1	1
g.chr12:7187543T>A	ColoRect-AdenoCA_TCGA	ENSG00000159403	C1R	chr12:7187523:-	0.49813	0.197968	-1.39156	chr12	7187543	T	A	N/A	1	1
g.chr12:72073755T>C	Liver-HCC_ICGC	ENSG00000173451	THAP2	chr12:72073776:+	0.652576	0.280513	-1.5723	chr12	72073755	T	C	N/A	1	1
g.chr12:75887723T>C	ColoRect-AdenoCA_TCGA	ENSG00000111615	GLIPR1	chr12:75887710:-	0.397301	0.124005	-1.53831	chr12	75887723	T	C	N/A	1	2
g.chr12:75887725T>C	ColoRect-AdenoCA_TCGA	ENSG00000111615	GLIPR1	chr12:75887710:-	0.397301	0.154925	-1.27976	chr12	75887725	T	C	N/A	1	2
g.chr12:75894378A>G	Panc-AdenoCA_ICGC	ENSG00000139278	GLIPR1	chr12:75894398:+	0.270643	0.0721336	-1.563	chr12	75894378	A	G	N/A	1	1
g.chr12:79981593T>G	ColoRect-AdenoCA_TCGA	ENSG00000177425	PAWR	chr12:79981571:-	0.920231	0.41327	-2.79596	chr12	79981593	T	G	N/A	1	1
g.chr12:80772844A>C	ColoRect-AdenoCA_TCGA	ENSG00000165899	OTOGL	chr12:80772874:+	0.275912	0.112326	-1.10237	chr12	80772844	A	C	N/A	1	1
g.chr12:80773507A>G	Lymph-CLL_ICGC	ENSG00000165899	OTOGL	chr12:80773529:+	0.556984	0.0857201	-2.59598	chr12	80773507	A	G	N/A	1	1
g.chr12:81191206T>G	Eso-AdenoCa_ICGC	ENSG00000111052	LIN7A	chr12:81191186:-	0.453292	0.140881	-1.62061	chr12	81191206	T	G	N/A	1	1
g.chr12:85253509T>G	ColoRect-AdenoCA_TCGA	ENSG00000072041	SLC6A15	chr12:85253481:-	0.80565	0.16599	-3.03631	chr12	85253509	T	G	N/A	1	1
g.chr12:8687106T>G	ColoRect-AdenoCA_TCGA	ENSG00000166523	CLEC4E	chr12:8687080:-	0.425748	0.127422	-1.62473	chr12	8687106	T	G	N/A	1	1
g.chr12:88442820T>A	Myeloid-MPN_ICGC	ENSG00000198707	C12orf29	chr12:88442793:-	0.604654	0.180279	-1.93935	chr12	88442820	T	A	N/A	1	1
g.chr12:88589730A>G	Liver-HCC_ICGC	ENSG00000139324	TMTC3	chr12:88589749:+	0.325764	0.108128	-1.3826	chr12	88589730	A	G	N/A	1	1
g.chr12:89981458T>C	Liver-HCC_ICGC	ENSG00000070961	ATP2B1	chr12:89981430:-	0.621525	0.351039	-1.1105	chr12	89981458	T	C	N/A	1	1
g.chr12:93166651T>G	ColoRect-AdenoCA_TCGA	ENSG00000102189	EEA1	chr12:93166635:-	0.698179	0.255934	-1.90585	chr12	93166651	T	G	N/A	1	1
g.chr12:94963925T>G	ColoRect-AdenoCA_TCGA	ENSG00000057704	TMCC3	chr12:94963903:-	0.111613	0.00791643	-2.7565	chr12	94963925	T	G	N/A	1	1
g.chr12:96663582A>C	ColoRect-AdenoCA_TCGA	ENSG00000111145	ELK3	chr12:96663602:+	0.713471	0.34043	-1.57368	chr12	96663582	A	C	N/A	1	1
g.chr12:97347337A>G	Breast-AdenoCa_ICGC	ENSG00000139350	NEDD1	chr12:97347360:+	0.579551	0.33192	-1.02044	chr12	97347337	A	G	N/A	1	1
g.chr12:98995466A>C	ColoRect-AdenoCA_TCGA	ENSG00000075415	SLC25A3	chr12:98995412:+	0.658513	0.115982	-2.68772	chr12	98995466	A	C	N/A	1	1
g.chr13:107142117T>C	Liver-HCC_ICGC	ENSG00000125266	EFNB2	chr13:107142093:-	0.908838	0.290599	-3.19201	chr13	107142117	T	C	N/A	1	1
g.chr13:107819332T>G	Eso-AdenoCa_ICGC	ENSG00000204442	FAM155A	chr13:107819306:-	0.409618	0.179497	-1.15421	chr13	107819332	T	G	N/A	1	1
g.chr13:108883238A>C	Skin-Melanoma_ICGC	ENSG00000139826	ABHD13	chr13:108883258:+	0.359368	0.0816739	-1.84171	chr13	108883238	A	C	N/A	1	1
g.chr13:110801425T>G	ColoRect-AdenoCA_TCGA	ENSG00000187498	COL4A1	chr13:110801347:-	0.787601	0.452689	-1.50034	chr13	110801425	T	G	N/A	1	1
g.chr13:21727491A>T	Liver-HCC_ICGC	ENSG00000165480	SKA3	chr13:21727454:-	0.234839	0.0303844	-2.28179	chr13	21727491	A	T	N/A	1	1
g.chr13:21949289T>A	Liver-HCC_ICGC	ENSG00000180776	ZDHHC20	chr13:21949273:-	0.358597	0.0317471	-2.83623	chr13	21949289	T	A	N/A	1	1
g.chr13:25821425T>G	ColoRect-AdenoCA_TCGA	ENSG00000139505	MTMR6	chr13:25821410:-	0.636653	0.211279	-1.8781	chr13	25821425	T	G	N/A	1	1
g.chr13:30337743T>C	ColoRect-AdenoCA_TCGA	ENSG00000122042	UBL3	chr13:30337721:-	0.339758	0.0747048	-1.8522	chr13	30337743	T	C	N/A	1	1
g.chr13:30339769T>C	Liver-HCC_ICGC	ENSG00000122042	UBL3	chr13:30339712:-	0.885484	0.473432	-2.15179	chr13	30339769	T	C	N/A	1	1
g.chr13:33677311T>G	ColoRect-AdenoCA_TCGA	ENSG00000133121	STARD13	chr13:33677274:-	0.787356	0.575355	-1.00533	chr13	33677311	T	G	N/A	1	1
g.chr13:34540547A>T	ColoRect-AdenoCA_TCGA	ENSG00000133119	RFC3	chr13:34540564:+	0.195405	0.0115703	-3.03241	chr13	34540547	A	T	N/A	1	1
g.chr13:37580187A>G	Liver-HCC_ICGC	ENSG00000102710	EXOSC8	chr13:37580164:-	0.494532	0.244969	-1.10375	chr13	37580187	A	G	N/A	1	1
g.chr13:38934951A>G	ColoRect-AdenoCA_TCGA	ENSG00000120686	UFM1	chr13:38934981:+	0.420152	0.17191	-1.25	chr13	38934951	A	G	N/A	1	1
g.chr13:38936911A>G	Liver-HCC_ICGC	ENSG00000120686	UFM1	chr13:38936935:+	0.689047	0.231139	-1.99756	chr13	38936911	A	G	N/A	1	1
g.chr13:39460057A>G	Liver-HCC_ICGC	ENSG00000150893	FREM2	chr13:39460074:+	0.757	0.346722	-1.76978	chr13	39460057	A	G	N/A	1	1
g.chr13:41130185T>A	Eso-AdenoCa_ICGC	ENSG00000150907	FOXO1	chr13:41130154:-	0.190193	0.068475	-1.1616	chr13	41130185	T	A	both	2	2
g.chr13:41130185T>A	Lymph-BNHL_ICGC	ENSG00000150907	FOXO1	chr13:41130154:-	0.190193	0.068475	-1.1616	chr13	41130185	T	A	both	2	2
g.chr13:41385857A>G	Skin-Melanoma_ICGC	ENSG00000102743	SLC25A15	chr13:41385877:+	0.482251	0.0306334	-3.38353	chr13	41385857	A	G	N/A	1	1
g.chr13:41765893T>C	Liver-HCC_ICGC	ENSG00000120696	KBTBD7	chr13:41765872:-	0.562256	0.279723	-1.19616	chr13	41765893	T	C	N/A	1	1
g.chr13:42897385A>C	ColoRect-AdenoCA_TCGA	ENSG00000023516	AKAP11	chr13:42897397:+	0.544473	0.156404	-1.86359	chr13	42897385	A	C	N/A	1	1
g.chr13:43460553T>G	ColoRect-AdenoCA_TCGA	ENSG00000133106	EPSTI1	chr13:43460528:-	0.865193	0.693768	-1.04131	chr13	43460553	T	G	N/A	1	1
g.chr13:43462141T>G	ColoRect-AdenoCA_TCGA	ENSG00000133106	EPSTI1	chr13:43462118:-	0.894803	0.591713	-1.76972	chr13	43462141	T	G	N/A	1	1
g.chr13:48835504A>G	Prost-AdenoCA_ICGC	ENSG00000136156	ITM2B	chr13:48835524:+	0.576264	0.0520893	-3.20875	chr13	48835504	A	G	N/A	1	1
g.chr13:49883955T>G	ColoRect-AdenoCA_TCGA	ENSG00000102547	CAB39L	chr13:49883903:-	0.517649	0.141908	-1.87016	chr13	49883955	T	G	N/A	1	1
g.chr13:53277426T>G	ColoRect-AdenoCA_TCGA	ENSG00000136110	LECT1	chr13:53277399:-	0.50301	0.192743	-1.44432	chr13	53277426	T	G	N/A	1	1
g.chr13:73283218T>G	ColoRect-AdenoCA_TCGA	ENSG00000204899	MZT1	chr13:73283144:-	0.619848	0.217208	-1.77091	chr13	73283218	T	G	N/A	1	1
g.chr13:73320424T>C	Kidney-RCC_ICGC	ENSG00000083520	BORA	chr13:73320405:-	0.396711	0.085414	-1.95177	chr13	73320424	T	C	N/A	1	1
g.chr13:74268446T>C	CNS-GBM_TCGA	ENSG00000118922	KLF12	chr13:74268425:-	0.513683	0.0168275	-4.12252	chr13	74268446	T	C	N/A	1	1
g.chr13:77581230T>G	Liver-HCC_ICGC	ENSG00000005812	FBXL3	chr13:77581213:-	0.331819	0.0672162	-1.93029	chr13	77581230	T	G	N/A	1	1
g.chr13:78338232A>C	Eso-AdenoCa_ICGC	ENSG00000139737	SLAIN1	chr13:78338259:+	0.464875	0.130142	-1.75898	chr13	78338232	A	C	N/A	1	1
g.chr13:95056828A>C	Eso-AdenoCa_ICGC	ENSG00000183098	GPC6	chr13:95056842:+	0.178305	0.0678619	-1.09213	chr13	95056828	A	C	N/A	1	1
g.chr13:95280922T>G	CNS-Medullo_ICGC	ENSG00000152749	GPR180	chr13:95280939:+	0.173438	0.0451403	-1.49033	chr13	95280922	T	G	N/A	1	1
g.chr13:95281367T>C	ColoRect-AdenoCA_TCGA	ENSG00000152749	GPR180	chr13:95281384:+	0.196527	0.0677601	-1.21347	chr13	95281367	T	C	N/A	1	1
g.chr13:96230483A>G	ColoRect-AdenoCA_TCGA	ENSG00000134874	CLDN10	chr13:96230460:-	0.474022	0.189196	-1.35123	chr13	96230483	A	G	N/A	1	1
g.chr13:97637989A>T	Biliary-AdenoCA_ICGC	ENSG00000165621	OXGR1	chr13:97637967:-	0.785771	0.190649	-2.74542	chr13	97637989	A	T	N/A	1	1
g.chr13:99104430T>G	ColoRect-AdenoCA_TCGA	ENSG00000102572	STK24	chr13:99104439:-	0.628667	0.158261	-2.19773	chr13	99104430	T	G	N/A	1	1
g.chr14:104024943T>C	Bladder-TCC_TCGA	ENSG00000166170	BAG5	chr14:104024925:-	0.160247	0.0271095	-1.924	chr14	104024943	T	C	N/A	1	1
g.chr14:21927109T>C	Liver-HCC_ICGC	ENSG00000129472	CHD8	chr14:21927095:-	0.183292	0.0266124	-2.1052	chr14	21927109	T	C	N/A	1	1
g.chr14:21965567A>C	ColoRect-AdenoCA_TCGA	ENSG00000092203	TOX4	chr14:21965598:+	0.274027	0.117346	-1.04352	chr14	21965567	A	C	N/A	1	1
g.chr14:21966302T>C	ColoRect-AdenoCA_TCGA	ENSG00000165819	TOX4	chr14:21966282:-	0.685226	0.0834973	-3.17365	chr14	21966302	T	C	N/A	1	2
g.chr14:21966307T>G	Liver-HCC_ICGC	ENSG00000165819	TOX4	chr14:21966282:-	0.685226	0.134419	-2.64034	chr14	21966307	T	G	N/A	1	2
g.chr14:23823993T>C	Skin-Melanoma_ICGC	ENSG00000100842	SLC22A17	chr14:23823972:-	0.316227	0.0487071	-2.20083	chr14	23823993	T	C	N/A	1	1
g.chr14:23848965A>G	Prost-AdenoCA_ICGC	ENSG00000166091	CMTM5	chr14:23848981:+	0.780951	0.0220092	-5.06526	chr14	23848965	A	G	N/A	1	1
g.chr14:24677429A>G	Skin-Melanoma_TCGA	ENSG00000139908	TSSK4	chr14:24677454:+	0.570701	0.127197	-2.21069	chr14	24677429	A	G	N/A	1	1
g.chr14:24683186A>T	ColoRect-AdenoCA_TCGA	ENSG00000139908	MDP1	chr14:24683206:+	0.833354	0.396052	-2.03153	chr14	24683186	A	T	N/A	1	1
g.chr14:24787594T>C	Myeloid-MPN_ICGC	ENSG00000129467	ADCY4	chr14:24787570:-	0.102207	0.0158767	-1.95396	chr14	24787594	T	C	N/A	1	1
g.chr14:25278681T>G	Uterus-AdenoCA_TCGA	ENSG00000168952	STXBP6	chr14:25278660:-	0.505445	0.217891	-1.29978	chr14	25278681	T	G	N/A	1	1
g.chr14:29238854A>C	Stomach-AdenoCA_TCGA	ENSG00000176165	FOXG1	chr14:29238871:+	0.805207	0.389315	-1.86935	chr14	29238854	A	C	N/A	1	1
g.chr14:33300538A>C	ColoRect-AdenoCA_TCGA	ENSG00000151320	AKAP6	chr14:33300570:+	0.705084	0.401331	-1.27155	chr14	33300538	A	C	N/A	1	1
g.chr14:35552076A>C	ColoRect-AdenoCA_TCGA	N/A	FAM177A1	chr14:35552102:+	0.194718	0.0234606	-2.30905	chr14	35552076	A	C	N/A	1	1
g.chr14:35869966T>G	ColoRect-AdenoCA_TCGA	ENSG00000100906	NFKBIA	chr14:35869949:-	0.279086	0.0397802	-2.23479	chr14	35869966	T	G	N/A	1	1
g.chr14:38311642A>C	ColoRect-AdenoCA_TCGA	ENSG00000139865	TTC6	chr14:38311660:+	0.5977	0.153734	-2.1015	chr14	38311642	A	C	N/A	1	1
g.chr14:45673077A>G	ColoRect-AdenoCA_TCGA	ENSG00000129534	MIS18BP1	chr14:45673051:-	0.84174	0.571238	-1.38433	chr14	45673077	A	G	N/A	1	1
g.chr14:50089400A>C	Liver-HCC_ICGC	ENSG00000168282	MGAT2	chr14:50089442:+	0.439082	0.132001	-1.63849	chr14	50089400	A	C	N/A	1	1
g.chr14:50091912T>G	ColoRect-AdenoCA_TCGA	ENSG00000165506	DNAAF2	chr14:50091892:-	0.881467	0.396329	-2.42718	chr14	50091912	T	G	N/A	1	1
g.chr14:50793413T>G	Liver-HCC_ICGC	ENSG00000125375	ATP5S	chr14:50793433:+	0.612944	0.201369	-1.83746	chr14	50793413	T	G	N/A	1	1
g.chr14:53109501T>G	ColoRect-AdenoCA_TCGA	ENSG00000197930	ERO1L	chr14:53109486:-	0.344216	0.11289	-1.41699	chr14	53109501	T	G	N/A	1	1
g.chr14:54890296T>G	ColoRect-AdenoCA_TCGA	ENSG00000100528	NA	chr14:54890279:-	0.772946	0.293385	-2.10402	chr14	54890296	T	G	N/A	1	1
g.chr14:56151104A>G	Liver-HCC_ICGC	ENSG00000126777	KTN1	chr14:56151157:+	0.238133	0.0978227	-1.05871	chr14	56151104	A	G	fusion	1	1
g.chr14:57115013A>C	ColoRect-AdenoCA_TCGA	ENSG00000070269	TMEM260	chr14:57115033:+	0.376183	0.149966	-1.22909	chr14	57115013	A	C	N/A	1	1
g.chr14:57882883A>G	ColoRect-AdenoCA_TCGA	ENSG00000139977	NAA30	chr14:57882907:+	0.382883	0.115293	-1.56045	chr14	57882883	A	G	N/A	1	1
g.chr14:58461521T>C	Liver-HCC_ICGC	ENSG00000139971	RP11-999E24.3	chr14:58461504:-	0.599208	0.232104	-1.59864	chr14	58461521	T	C	N/A	1	1
g.chr14:59970832A>G	Liver-HCC_ICGC	ENSG00000050130	CCDC175	chr14:59970855:+	0.447406	0.100867	-1.97647	chr14	59970832	A	G	N/A	1	1
g.chr14:60062717T>C	ColoRect-AdenoCA_TCGA	ENSG00000139970	RTN1	chr14:60062701:-	0.435345	0.116025	-1.77055	chr14	60062717	T	C	N/A	1	1
g.chr14:60978494A>G	CNS-Medullo_ICGC	ENSG00000184302	SIX6	chr14:60978521:+	0.290686	0.0528534	-1.99387	chr14	60978494	A	G	N/A	1	1
g.chr14:61441758T>G	ColoRect-AdenoCA_TCGA	ENSG00000126814	TRMT5	chr14:61441729:-	0.870599	0.390874	-2.34991	chr14	61441758	T	G	N/A	1	1
g.chr14:62262165A>G	Kidney-RCC_ICGC	ENSG00000023608	SNAPC1	chr14:62262215:+	0.949432	0.475004	-3.03262	chr14	62262165	A	G	N/A	1	1
g.chr14:62263124A>C	ColoRect-AdenoCA_TCGA	ENSG00000023608	SNAPC1	chr14:62263146:+	0.783155	0.272839	-2.26441	chr14	62263124	A	C	N/A	1	1
g.chr14:62578952A>C	ColoRect-AdenoCA_TCGA	ENSG00000139973	RP11-355I22.7	chr14:62578969:+	0.571931	0.0986376	-2.50219	chr14	62578952	A	C	N/A	1	1
g.chr14:69340863A>G	Skin-Melanoma_TCGA	ENSG00000072110	ACTN1	chr14:69340904:-	0.38183	0.137575	-1.35379	chr14	69340863	A	G	N/A	1	1
g.chr14:69826010A>C	ColoRect-AdenoCA_TCGA	ENSG00000100626	GALNT16	chr14:69826032:+	0.724653	0.365655	-1.51856	chr14	69826010	A	C	N/A	1	1
g.chr14:70181838A>T	ColoRect-AdenoCA_TCGA	ENSG00000100647	KIAA0247	chr14:70181861:+	0.824336	0.258017	-2.6023	chr14	70181838	A	T	N/A	1	1
g.chr14:74181848T>C	Eso-AdenoCa_ICGC	ENSG00000156030	ELMSAN1	chr14:74181829:-	0.693095	0.19363	-2.24122	chr14	74181848	T	C	N/A	1	1
g.chr14:74966442T>G	Stomach-AdenoCA_TCGA	ENSG00000165898	LTBP2	chr14:74966459:+	0.245332	0.0792768	-1.32855	chr14	74966442	T	G	N/A	1	1
g.chr14:75407686T>G	ColoRect-AdenoCA_TCGA	ENSG00000119630	PGF	chr14:75407666:-	0.494022	0.122897	-1.94136	chr14	75407686	T	G	N/A	1	2
g.chr14:75407687T>A	Eso-AdenoCa_ICGC	ENSG00000119630	PGF	chr14:75407666:-	0.494022	0.0247932	-3.64816	chr14	75407687	T	A	N/A	1	2
g.chr14:75598192T>A	Stomach-AdenoCA_TCGA	ENSG00000170348	TMED10	chr14:75598155:-	0.941114	0.518538	-2.69727	chr14	75598192	T	A	N/A	1	1
g.chr14:77805163A>G	Biliary-AdenoCA_ICGC	ENSG00000100577	TMED8	chr14:77805182:+	0.458487	0.15962	-1.49463	chr14	77805163	A	G	N/A	1	1
g.chr14:81644066T>C	Lung-SCC_TCGA	ENSG00000165417	GTF2A1	chr14:81644041:-	0.287155	0.120807	-1.07556	chr14	81644066	T	C	N/A	1	1
g.chr14:86096044A>C	ColoRect-AdenoCA_TCGA	ENSG00000185070	FLRT2	chr14:86096065:+	0.624028	0.195468	-1.92154	chr14	86096044	A	C	N/A	1	1
g.chr14:88932318A>C	Liver-HCC_ICGC	ENSG00000070778	PTPN21	chr14:88932300:-	0.39087	0.188695	-1.01486	chr14	88932318	A	C	N/A	1	1
g.chr14:88934138T>C	Lung-SCC_TCGA	ENSG00000070778	PTPN21	chr14:88934114:-	0.54924	0.0061181	-5.28797	chr14	88934138	T	C	N/A	1	1
g.chr14:92245226T>G	ColoRect-AdenoCA_TCGA	ENSG00000165929	TC2N	chr14:92245203:-	0.69982	0.302556	-1.68159	chr14	92245226	T	G	N/A	1	1
g.chr14:92247164T>G	Skin-Melanoma_ICGC	ENSG00000165929	TC2N	chr14:92247081:-	0.311325	0.128409	-1.12117	chr14	92247164	T	G	N/A	1	1
g.chr14:92247556A>G	Stomach-AdenoCA_TCGA	ENSG00000165929	TC2N	chr14:92247466:-	0.575011	0.141652	-2.10396	chr14	92247556	A	G	N/A	1	1
g.chr14:93648561T>C	ColoRect-AdenoCA_TCGA	ENSG00000165943	MOAP1	chr14:93648470:-	0.888615	0.46134	-2.23162	chr14	93648561	T	C	N/A	1	1
g.chr14:94770603T>G	ColoRect-AdenoCA_TCGA	ENSG00000170099	SERPINA6	chr14:94770585:-	0.357826	0.0426821	-2.52554	chr14	94770603	T	G	N/A	1	1
g.chr14:94844726T>C	Liver-HCC_ICGC	ENSG00000197249	SERPINA1	chr14:94844710:-	0.0651736	0.0195889	-1.2497	chr14	94844726	T	C	N/A	1	1
g.chr14:94953641T>C	ColoRect-AdenoCA_TCGA	ENSG00000165953	SERPINA12	chr14:94953616:-	0.2296	0.0205877	-2.65169	chr14	94953641	T	C	N/A	1	1
g.chr14:97031364A>G	Liver-HCC_ICGC	ENSG00000090060	PAPOLA	chr14:97031428:+	0.321548	0.0974386	-1.47935	chr14	97031364	A	G	N/A	1	1
g.chr15:100267634T>G	ColoRect-AdenoCA_TCGA	ENSG00000183060	LYSMD4	chr15:100267610:-	0.762045	0.205311	-2.51735	chr15	100267634	T	G	N/A	1	1
g.chr15:23004698T>G	ColoRect-AdenoCA_TCGA	ENSG00000140157	NIPA2	chr15:23004602:-	0.46174	0.204558	-1.20471	chr15	23004698	T	G	N/A	1	1
g.chr15:25917521T>G	ColoRect-AdenoCA_TCGA	ENSG00000206190	ATP10A	chr15:25917503:-	0.229313	0.0471399	-1.79416	chr15	25917521	T	G	N/A	1	1
g.chr15:32989278A>T	Lung-SCC_TCGA	ENSG00000166922	SCG5	chr15:32989293:+	0.520256	0.163907	-1.71051	chr15	32989278	A	T	N/A	1	1
g.chr15:34633940T>G	ColoRect-AdenoCA_TCGA	ENSG00000182117	NOP10	chr15:34633920:-	0.631712	0.261612	-1.57717	chr15	34633940	T	G	N/A	1	1
g.chr15:38788809A>T	Skin-Melanoma_TCGA	ENSG00000171262	RASGRP1	chr15:38788828:+	0.718095	0.37126	-1.46184	chr15	38788809	A	T	N/A	1	1
g.chr15:39892253T>G	ColoRect-AdenoCA_TCGA	ENSG00000150667	FSIP1	chr15:39892232:-	0.448759	0.182928	-1.29095	chr15	39892253	T	G	N/A	1	1
g.chr15:41026741A>T	Panc-AdenoCA_ICGC	ENSG00000051180	RAD51	chr15:41026768:+	0.387215	0.0981888	-1.75848	chr15	41026741	A	T	N/A	1	1
g.chr15:41601486T>G	ColoRect-AdenoCA_TCGA	ENSG00000104147	OIP5	chr15:41601402:-	0.666693	0.349088	-1.31631	chr15	41601486	T	G	N/A	1	1
g.chr15:42061953A>C	ColoRect-AdenoCA_TCGA	ENSG00000174197	MGA	chr15:42061973:+	0.499676	0.222147	-1.2519	chr15	42061953	A	C	N/A	1	1
g.chr15:42151298A>C	Eso-AdenoCa_ICGC	ENSG00000243708	SPTBN5	chr15:42151314:+	0.376758	0.113973	-1.54745	chr15	42151298	A	C	N/A	1	1
g.chr15:42830538T>C	ColoRect-AdenoCA_TCGA	ENSG00000180979	LRRC57	chr15:42830472:-	0.532561	0.257624	-1.18878	chr15	42830538	T	C	N/A	1	1
g.chr15:43237390T>G	ColoRect-AdenoCA_TCGA	ENSG00000159459	UBR1	chr15:43237333:-	0.586886	0.0840591	-2.73954	chr15	43237390	T	G	N/A	1	1
g.chr15:44821220A>C	ColoRect-AdenoCA_TCGA	ENSG00000137770	CTDSPL2	chr15:44821236:+	0.686497	0.31758	-1.54871	chr15	44821220	A	C	N/A	1	1
g.chr15:44858516T>A	ColoRect-AdenoCA_TCGA	ENSG00000104131	SPG11	chr15:44858532:+	0.235049	0.0516642	-1.72993	chr15	44858516	T	A	N/A	1	1
g.chr15:48431810T>C	Head-SCC_TCGA	ENSG00000104177	MYEF2	chr15:48431765:-	0.558401	0.209061	-1.56527	chr15	48431810	T	C	N/A	1	1
g.chr15:50852837T>C	Prost-AdenoCA_ICGC	ENSG00000092439	TRPM7	chr15:50852817:-	0.264636	0.112536	-1.04308	chr15	50852837	T	C	N/A	1	1
g.chr15:52012174A>C	ColoRect-AdenoCA_TCGA	ENSG00000104112	SCG3	chr15:52012194:+	0.535514	0.215545	-1.43412	chr15	52012174	A	C	N/A	1	1
g.chr15:52230238T>G	ColoRect-AdenoCA_TCGA	ENSG00000166477	LEO1	chr15:52230222:-	0.782161	0.322913	-2.01872	chr15	52230238	T	G	N/A	1	1
g.chr15:55473402T>G	Lung-SCC_TCGA	ENSG00000137876	RSL24D1	chr15:55473383:-	0.404004	0.171869	-1.18363	chr15	55473402	T	G	N/A	1	1
g.chr15:55474003T>A	Liver-HCC_ICGC	ENSG00000137876	RSL24D1	chr15:55473928:-	0.503543	0.181476	-1.52055	chr15	55474003	T	A	N/A	1	1
g.chr15:55831108T>G	ColoRect-AdenoCA_TCGA	ENSG00000171016	PYGO1	chr15:55831082:-	0.756789	0.407823	-1.50812	chr15	55831108	T	G	N/A	2	2
g.chr15:55831108T>G	ColoRect-AdenoCA_TCGA	ENSG00000171016	PYGO1	chr15:55831082:-	0.756789	0.407823	-1.50812	chr15	55831108	T	G	N/A	2	2
g.chr15:55831682T>C	Uterus-AdenoCA_TCGA	ENSG00000171016	PYGO1	chr15:55831659:-	0.79866	0.370054	-1.90993	chr15	55831682	T	C	N/A	1	1
g.chr15:58879305A>G	Liver-HCC_ICGC	ENSG00000137845	RP11-50C13.1	chr15:58879286:-	0.629925	0.353395	-1.13604	chr15	58879305	A	G	N/A	1	1
g.chr15:59388606A>G	Liver-HCC_ICGC	ENSG00000157450	RNF111	chr15:59388630:+	0.863771	0.504485	-1.82903	chr15	59388606	A	G	N/A	1	1
g.chr15:60715339T>C	Prost-AdenoCA_ICGC	ENSG00000128915	NARG2	chr15:60715320:-	0.52195	0.24324	-1.22285	chr15	60715339	T	C	N/A	1	1
g.chr15:62455752T>C	Skin-Melanoma_ICGC	ENSG00000205502	C2CD4B	chr15:62455734:-	0.831453	0.061038	-4.32924	chr15	62455752	T	C	N/A	1	2
g.chr15:62455754T>C	Skin-Melanoma_ICGC	ENSG00000205502	C2CD4B	chr15:62455734:-	0.831453	0.0498682	-4.54318	chr15	62455754	T	C	N/A	1	2
g.chr15:64658119T>G	ColoRect-AdenoCA_TCGA	ENSG00000166803	KIAA0101	chr15:64658025:-	0.489725	0.24195	-1.10091	chr15	64658119	T	G	N/A	1	1
g.chr15:65871138T>C	Eso-AdenoCa_ICGC	ENSG00000138614	VWA9	chr15:65871116:-	0.675187	0.199483	-2.12127	chr15	65871138	T	C	N/A	1	1
g.chr15:67484088T>G	Liver-HCC_ICGC	ENSG00000166949	SMAD3	chr15:67484112:+	0.269337	0.0534516	-1.87606	chr15	67484088	T	G	tsg	1	1
g.chr15:67492818T>C	Breast-AdenoCa_TCGA	ENSG00000103591	AAGAB	chr15:67492794:-	0.412571	0.137461	-1.4832	chr15	67492818	T	C	N/A	1	1
g.chr15:68585909A>C	ColoRect-AdenoCA_TCGA	ENSG00000169018	FEM1B	chr15:68585932:+	0.264843	0.0909826	-1.28075	chr15	68585909	A	C	N/A	1	1
g.chr15:69071260T>G	ColoRect-AdenoCA_TCGA	ENSG00000140350	ANP32A	chr15:69071313:-	0.587301	0.243545	-1.48616	chr15	69071260	T	G	N/A	1	1
g.chr15:72491388T>C	ColoRect-AdenoCA_TCGA	ENSG00000067225	PKM	chr15:72491372:-	0.650413	0.129335	-2.52771	chr15	72491388	T	C	N/A	1	1
g.chr15:72635798A>C	ColoRect-AdenoCA_TCGA	ENSG00000213614	HEXA	chr15:72635778:-	0.650151	0.36417	-1.17702	chr15	72635798	A	C	N/A	1	1
g.chr15:73612214T>G	ColoRect-AdenoCA_TCGA	ENSG00000138622	HCN4	chr15:73612200:-	0.230002	0.0683051	-1.40472	chr15	73612214	T	G	N/A	1	1
g.chr15:75124117T>A	Uterus-AdenoCA_TCGA	ENSG00000213578	CPLX3	chr15:75124112:+	0.727276	0.305128	-1.80384	chr15	75124117	T	A	N/A	1	1
g.chr15:75342063A>C	ColoRect-AdenoCA_TCGA	ENSG00000138621	PPCDC	chr15:75342081:+	0.262726	0.0706542	-1.54484	chr15	75342063	A	C	N/A	1	1
g.chr15:75348347A>C	ColoRect-AdenoCA_TCGA	ENSG00000138621	PPCDC	chr15:75348378:+	0.38672	0.0682607	-2.1526	chr15	75348347	A	C	N/A	1	1
g.chr15:76192617A>C	ColoRect-AdenoCA_TCGA	ENSG00000140367	UBE2Q2	chr15:76192640:+	0.382787	0.112255	-1.59017	chr15	76192617	A	C	N/A	1	1
g.chr15:76233724A>C	ColoRect-AdenoCA_TCGA	ENSG00000167196	NRG4	chr15:76233743:+	0.365954	0.135893	-1.30021	chr15	76233724	A	C	N/A	1	1
g.chr15:76634800A>C	ColoRect-AdenoCA_TCGA	ENSG00000159556	ISL2	chr15:76634816:+	0.331821	0.100201	-1.49503	chr15	76634800	A	C	N/A	1	1
g.chr15:78893579A>C	ColoRect-AdenoCA_TCGA	ENSG00000169684	CHRNA3	chr15:78893593:+	0.601116	0.348687	-1.03493	chr15	78893579	A	C	N/A	1	1
g.chr15:80430274T>G	ColoRect-AdenoCA_TCGA	ENSG00000086666	ZFAND6	chr15:80430291:+	0.4324	0.0312416	-3.1622	chr15	80430274	T	G	N/A	1	1
g.chr15:83659771A>T	Ovary-AdenoCA_ICGC	ENSG00000169612	FAM103A1	chr15:83659788:+	0.608258	0.362606	-1.00407	chr15	83659771	A	T	N/A	1	1
g.chr15:83790536T>G	ColoRect-AdenoCA_TCGA	ENSG00000166503	TM6SF1	chr15:83790522:-	0.194903	0.0750149	-1.09363	chr15	83790536	T	G	N/A	1	1
g.chr15:83806574T>C	Panc-AdenoCA_ICGC	ENSG00000166503	HDGFRP3	chr15:83806550:-	0.480644	0.100824	-2.11064	chr15	83806574	T	C	N/A	1	1
g.chr15:85346512A>C	ColoRect-AdenoCA_TCGA	ENSG00000166716	ZNF592	chr15:85346531:+	0.40438	0.070968	-2.18467	chr15	85346512	A	C	N/A	1	1
g.chr15:89175492T>G	ColoRect-AdenoCA_TCGA	ENSG00000181026	AEN	chr15:89175512:+	0.659862	0.0913655	-2.95975	chr15	89175492	T	G	N/A	1	1
g.chr16:104283T>C	ColoRect-AdenoCA_TCGA	ENSG00000007384	SNRNP25	chr16:104262:-	0.419618	0.0778444	-2.14766	chr16	104283	T	C	N/A	1	1
g.chr16:10576283A>C	Liver-HCC_ICGC	ENSG00000166669	ATF7IP2	chr16:10576302:+	0.0541744	0.0177201	-1.15533	chr16	10576283	A	C	N/A	1	1
g.chr16:12758482A>C	Eso-AdenoCa_ICGC	ENSG00000103381	CPPED1	chr16:12758455:-	0.291929	0.0381356	-2.34169	chr16	12758482	A	C	N/A	1	1
g.chr16:13334257A>C	ColoRect-AdenoCA_TCGA	ENSG00000237515	SHISA9	chr16:13334273:+	0.679192	0.189678	-2.20217	chr16	13334257	A	C	N/A	1	1
g.chr16:13338623A>G	Lung-SCC_TCGA	ENSG00000237515	U91319.1	chr16:13338647:+	0.590334	0.176562	-1.90516	chr16	13338623	A	G	N/A	1	1
g.chr16:17196205A>G	Liver-HCC_ICGC	ENSG00000103489	XYLT1	chr16:17196181:-	0.482328	0.189994	-1.37933	chr16	17196205	A	G	N/A	1	1
g.chr16:19509519A>G	Uterus-AdenoCA_TCGA	ENSG00000103534	TMC5	chr16:19509540:+	0.301089	0.0920274	-1.44701	chr16	19509519	A	G	N/A	1	1
g.chr16:19699748T>C	Stomach-AdenoCA_TCGA	ENSG00000103550	C16orf62	chr16:19699724:-	0.318139	0.0380894	-2.46665	chr16	19699748	T	C	N/A	1	1
g.chr16:20744856T>G	ColoRect-AdenoCA_TCGA	ENSG00000066654	THUMPD1	chr16:20744837:-	0.547932	0.288563	-1.09469	chr16	20744856	T	G	N/A	1	1
g.chr16:23474879T>G	Liver-HCC_ICGC	ENSG00000103365	GGA2	chr16:23474863:-	0.716176	0.163651	-2.55688	chr16	23474879	T	G	N/A	1	1
g.chr16:2553523A>G	Eso-AdenoCa_ICGC	ENSG00000162065	TBC1D24	chr16:2553550:+	0.604365	0.212873	-1.73138	chr16	2553523	A	G	N/A	1	1
g.chr16:2553899A>G	Liver-HCC_ICGC	ENSG00000162065	TBC1D24	chr16:2553987:+	0.551237	0.29605	-1.07185	chr16	2553899	A	G	N/A	1	1
g.chr16:28910078T>G	Liver-HCC_ICGC	ENSG00000177548	ATP2A1	chr16:28910062:-	0.743118	0.183782	-2.55317	chr16	28910078	T	G	N/A	1	1
g.chr16:29827184A>C	ColoRect-AdenoCA_TCGA	ENSG00000167371	PRRT2	chr16:29827200:+	0.637793	0.0458155	-3.60203	chr16	29827184	A	C	N/A	1	1
g.chr16:30004337T>C	Ovary-AdenoCA_ICGC	ENSG00000149929	HIRIP3	chr16:30004316:-	0.440604	0.00841959	-4.53003	chr16	30004337	T	C	N/A	1	1
g.chr16:3069761T>G	ColoRect-AdenoCA_TCGA	ENSG00000103145	CLDN6	chr16:3069773:-	0.61166	0.358165	-1.03763	chr16	3069761	T	G	N/A	1	1
g.chr16:30772474A>G	Lymph-BNHL_ICGC	ENSG00000156873	PHKG2	chr16:30772497:+	0.518828	0.071932	-2.63273	chr16	30772474	A	G	N/A	1	1
g.chr16:31478468T>G	ColoRect-AdenoCA_TCGA	ENSG00000140691	ARMC5	chr16:31478486:+	0.55058	0.00961476	-4.83781	chr16	31478468	T	G	N/A	1	1
g.chr16:3256483A>T	Breast-AdenoCa_TCGA	ENSG00000168124	OR1F1	chr16:3256506:+	0.292886	0.064482	-1.79331	chr16	3256483	A	T	N/A	1	2
g.chr16:3256484A>C	ColoRect-AdenoCA_TCGA	ENSG00000168124	OR1F1	chr16:3256506:+	0.292886	0.0440939	-2.19493	chr16	3256484	A	C	N/A	1	2
g.chr16:3341440A>C	ColoRect-AdenoCA_TCGA	ENSG00000006194	ZNF263	chr16:3341460:+	0.503817	0.201003	-1.39531	chr16	3341440	A	C	N/A	1	1
g.chr16:3368556A>G	Kidney-RCC_TCGA	ENSG00000162086	ZNF75A	chr16:3368576:+	0.251469	0.108949	-1.01073	chr16	3368556	A	G	N/A	1	1
g.chr16:337458T>G	Prost-AdenoCA_ICGC	ENSG00000103126	AXIN1	chr16:337440:-	0.864291	0.477471	-1.94157	chr16	337458	T	G	tsg	1	1
g.chr16:3586810A>T	Bone-Leiomyo_TCGA	ENSG00000103351	CLUAP1	chr16:3586859:+	0.264082	0.0991354	-1.18201	chr16	3586810	A	T	N/A	1	1
g.chr16:4014919T>A	Panc-AdenoCA_ICGC	ENSG00000162104	ADCY9	chr16:4014904:-	0.434663	0.195056	-1.15464	chr16	4014919	T	A	N/A	1	1
g.chr16:4559888A>C	ColoRect-AdenoCA_TCGA	ENSG00000103415	HMOX2	chr16:4559903:+	0.190478	0.0427513	-1.66175	chr16	4559888	A	C	N/A	1	1
g.chr16:46612684T>G	ColoRect-AdenoCA_TCGA	ENSG00000171241	SHCBP1	chr16:46612656:-	0.576225	0.2195	-1.57588	chr16	46612684	T	G	N/A	1	1
g.chr16:50683144A>T	Skin-Melanoma_TCGA	ENSG00000140807	RP11-401P9.4	chr16:50683160:+	0.379523	0.130994	-1.40063	chr16	50683144	A	T	N/A	1	1
g.chr16:56980369A>G	Liver-HCC_ICGC	ENSG00000051108	HERPUD1	chr16:56980387:+	0.479155	0.104941	-2.06007	chr16	56980369	A	G	fusion	1	1
g.chr16:57418937A>C	ColoRect-AdenoCA_TCGA	ENSG00000006210	CX3CL1	chr16:57418956:+	0.804153	0.200599	-2.79501	chr16	57418937	A	C	N/A	1	1
g.chr16:58055500A>C	ColoRect-AdenoCA_TCGA	ENSG00000103005	USB1	chr16:58055515:+	0.597027	0.122632	-2.36083	chr16	58055500	A	C	N/A	1	1
g.chr16:66501234T>C	Liver-HCC_ICGC	ENSG00000260851	BEAN1	chr16:66501209:-	0.405359	0.0719271	-2.17427	chr16	66501234	T	C	N/A	1	1
g.chr16:66955606A>T	Skin-Melanoma_ICGC	ENSG00000166592	RRAD	chr16:66955588:-	0.77574	0.00244589	-7.2519	chr16	66955606	A	T	N/A	1	1
g.chr16:67134272A>C	Kidney-RCC_ICGC	ENSG00000067955	CBFB	chr16:67134293:+	0.526613	0.171141	-1.68411	chr16	67134272	A	C	tsg	1	1
g.chr16:67702636A>C	Liver-HCC_ICGC	ENSG00000159761	C16orf86	chr16:67702658:+	0.255277	0.0957121	-1.17514	chr16	67702636	A	C	N/A	1	1
g.chr16:68021315T>C	Lymph-BNHL_ICGC	ENSG00000167261	DPEP2	chr16:68021297:-	0.49909	0.0985808	-2.20946	chr16	68021315	T	C	N/A	1	1
g.chr16:68055229T>C	Liver-HCC_ICGC	ENSG00000182810	DDX28	chr16:68055177:-	0.660148	0.206908	-2.00762	chr16	68055229	T	C	N/A	1	1
g.chr16:68333776T>G	ColoRect-AdenoCA_TCGA	ENSG00000103061	SLC7A6OS	chr16:68333758:-	0.130802	0.0307215	-1.55771	chr16	68333776	T	G	N/A	1	1
g.chr16:698458A>C	ColoRect-AdenoCA_TCGA	N/A	FAM195A	chr16:698474:+	0.335671	0.0276798	-2.87634	chr16	698458	A	C	N/A	1	1
g.chr16:70192201A>G	Lymph-BNHL_ICGC	ENSG00000090857	PDPR	chr16:70192234:+	0.383407	0.0629656	-2.22502	chr16	70192201	A	G	N/A	1	1
g.chr16:71893604T>G	ColoRect-AdenoCA_TCGA	ENSG00000102984	ZNF821	chr16:71893588:-	0.552963	0.285216	-1.13138	chr16	71893604	T	G	N/A	1	1
g.chr16:732731A>C	ColoRect-AdenoCA_TCGA	ENSG00000103266	JMJD8	chr16:732704:+	0.0480783	0.00668344	-2.01576	chr16	732731	A	C	N/A	1	1
g.chr16:742517T>A	Eso-AdenoCa_ICGC	ENSG00000127585	FBXL16	chr16:742568:-	0.540523	0.219294	-1.43224	chr16	742517	T	A	N/A	1	1
g.chr16:82027300T>C	ColoRect-AdenoCA_TCGA	ENSG00000184860	SDR42E1	chr16:82027276:-	0.41676	0.0894452	-1.98434	chr16	82027300	T	C	N/A	1	1
g.chr16:82028897T>G	ColoRect-AdenoCA_TCGA	ENSG00000184860	SDR42E1	chr16:82028884:-	0.264276	0.0663496	-1.6203	chr16	82028897	T	G	N/A	1	1
g.chr16:83967760A>G	Stomach-AdenoCA_TCGA	ENSG00000103150	RP11-505K9.4	chr16:83967785:+	0.0764415	0.00745188	-2.4001	chr16	83967760	A	G	N/A	1	1
g.chr16:84701146A>C	ColoRect-AdenoCA_TCGA	ENSG00000135686	KLHL36	chr16:84701160:+	0.446915	0.126589	-1.71832	chr16	84701146	A	C	N/A	1	1
g.chr16:85711296T>G	ColoRect-AdenoCA_TCGA	ENSG00000131153	GINS2	chr16:85711310:-	0.334539	0.0305169	-2.77076	chr16	85711296	T	G	N/A	1	1
g.chr16:89748936T>G	ColoRect-AdenoCA_TCGA	ENSG00000158792	CDK10	chr16:89748915:-	0.213045	0.00645796	-3.7293	chr16	89748936	T	G	N/A	1	1
g.chr16:9211456A>G	Liver-HCC_ICGC	ENSG00000182831	C16orf72	chr16:9211471:+	0.177342	0.0606295	-1.20597	chr16	9211456	A	G	N/A	1	1
g.chr16:9211902A>C	ColoRect-AdenoCA_TCGA	ENSG00000182831	C16orf72	chr16:9211961:+	0.404816	0.123123	-1.57775	chr16	9211902	A	C	N/A	1	1
g.chr17:1553940T>G	ColoRect-AdenoCA_TCGA	ENSG00000174231	PRPF8	chr17:1553923:-	0.957987	0.790581	-1.79842	chr17	1553940	T	G	N/A	1	1
g.chr17:18872133T>C	Liver-HCC_ICGC	ENSG00000188522	FAM83G	chr17:18872102:-	0.234463	0.0190212	-2.75972	chr17	18872133	T	C	N/A	1	1
g.chr17:19286774T>A	Prost-AdenoCA_ICGC	ENSG00000166482	MAPK7	chr17:19286758:-	0.281912	0.0672285	-1.69507	chr17	19286774	T	A	N/A	1	1
g.chr17:21094714A>G	Liver-HCC_ICGC	ENSG00000109016	DHRS7B	chr17:21094707:+	0.301992	0.0946056	-1.42082	chr17	21094714	A	G	N/A	1	1
g.chr17:2586316T>C	CNS-GBM_TCGA	ENSG00000007168	PAFAH1B1	chr17:2586337:+	0.201985	0.062478	-1.33449	chr17	2586316	T	C	N/A	1	1
g.chr17:26694325T>C	Liver-HCC_ICGC	ENSG00000109072	VTN	chr17:26694305:-	0.459138	0.139296	-1.65734	chr17	26694325	T	C	N/A	1	1
g.chr17:27049510A>C	ColoRect-AdenoCA_TCGA	ENSG00000160606	RPL23A	chr17:27049494:-	0.0799919	0.0038375	-3.11663	chr17	27049510	A	C	N/A	1	1
g.chr17:27952977T>C	Liver-HCC_ICGC	ENSG00000141298	SSH2	chr17:27952963:-	0.683887	0.131891	-2.65603	chr17	27952977	T	C	N/A	1	1
g.chr17:29630938T>A	Kidney-RCC_ICGC	ENSG00000185862	EVI2B	chr17:29630912:-	0.513747	0.238609	-1.21532	chr17	29630938	T	A	N/A	1	1
g.chr17:30326663A>C	ColoRect-AdenoCA_TCGA	ENSG00000178691	SUZ12	chr17:30326688:+	0.398751	0.164504	-1.21442	chr17	30326663	A	C	both	1	1
g.chr17:30700753A>C	ColoRect-AdenoCA_TCGA	ENSG00000010244	ZNF207	chr17:30700791:+	0.499469	0.250684	-1.09284	chr17	30700753	A	C	N/A	1	1
g.chr17:33297367T>A	Stomach-AdenoCA_TCGA	ENSG00000198783	ZNF830	chr17:33297395:+	0.229343	0.00299797	-4.59479	chr17	33297367	T	A	N/A	1	1
g.chr17:33336580T>C	Skin-Melanoma_TCGA	ENSG00000092871	RFFL	chr17:33336541:-	0.328316	0.0924908	-1.56778	chr17	33336580	T	C	N/A	1	1
g.chr17:34971234A>C	ColoRect-AdenoCA_TCGA	ENSG00000129282	NA	chr17:34971252:+	0.799126	0.424024	-1.68712	chr17	34971234	A	C	N/A	1	1
g.chr17:3553441T>G	ColoRect-AdenoCA_TCGA	ENSG00000213977	CTNS	chr17:3553420:-	0.251429	0.0938284	-1.17676	chr17	3553441	T	G	N/A	1	1
g.chr17:35839813A>C	Eso-AdenoCa_ICGC	ENSG00000108264	TADA2A	chr17:35839830:+	0.522346	0.0505694	-3.02196	chr17	35839813	A	C	N/A	1	1
g.chr17:36891344T>A	Uterus-AdenoCA_TCGA	ENSG00000056661	PCGF2	chr17:36891253:-	0.79462	0.384252	-1.82454	chr17	36891344	T	A	N/A	2	3
g.chr17:36891344T>A	Kidney-RCC_ICGC	ENSG00000056661	PCGF2	chr17:36891253:-	0.79462	0.384252	-1.82454	chr17	36891344	T	A	N/A	2	3
g.chr17:36891345T>G	Eso-AdenoCa_ICGC	ENSG00000056661	PCGF2	chr17:36891253:-	0.79462	0.38937	-1.80296	chr17	36891345	T	G	N/A	1	3
g.chr17:37416864T>G	ColoRect-AdenoCA_TCGA	ENSG00000108306	FBXL20	chr17:37416845:-	0.342367	0.13449	-1.20906	chr17	37416864	T	G	N/A	1	2
g.chr17:37416867T>C	Kidney-RCC_TCGA	ENSG00000108306	FBXL20	chr17:37416845:-	0.342367	0.144108	-1.12882	chr17	37416867	T	C	N/A	1	2
g.chr17:37689780A>C	ColoRect-AdenoCA_TCGA	ENSG00000167258	CDK12	chr17:37689803:+	0.723438	0.252205	-2.04847	chr17	37689780	A	C	tsg	1	1
g.chr17:38440367A>C	ColoRect-AdenoCA_TCGA	ENSG00000171475	WIPF2	chr17:38440388:+	0.388245	0.0803185	-1.98333	chr17	38440367	A	C	N/A	1	1
g.chr17:39457738T>G	ColoRect-AdenoCA_TCGA	ENSG00000212658	KRTAP29-1	chr17:39457712:-	0.5309	0.140747	-1.93286	chr17	39457738	T	G	N/A	1	1
g.chr17:39471192T>G	ColoRect-AdenoCA_TCGA	ENSG00000186860	KRTAP17-1	chr17:39471164:-	0.6968	0.110767	-2.91503	chr17	39471192	T	G	N/A	1	1
g.chr17:39979448A>C	ColoRect-AdenoCA_TCGA	ENSG00000141756	FKBP10	chr17:39979465:+	0.46789	0.203747	-1.23442	chr17	39979448	A	C	N/A	1	1
g.chr17:40731550T>G	ColoRect-AdenoCA_TCGA	ENSG00000141699	FAM134C	chr17:40731533:-	0.172579	0.0256555	-2.06955	chr17	40731550	T	G	N/A	1	1
g.chr17:4172573T>G	ColoRect-AdenoCA_TCGA	ENSG00000132388	UBE2G1	chr17:4172516:-	0.306328	0.0891895	-1.50623	chr17	4172573	T	G	N/A	1	1
g.chr17:42086376T>C	Kidney-RCC_TCGA	ENSG00000091947	NAGS	chr17:42086356:-	0.242555	0.0386276	-2.07568	chr17	42086376	T	C	N/A	1	1
g.chr17:45400493A>G	ColoRect-AdenoCA_TCGA	ENSG00000259753	EFCAB13	chr17:45400580:+	0.827201	0.419841	-1.88934	chr17	45400493	A	G	N/A	1	1
g.chr17:45520711A>C	Lung-SCC_TCGA	ENSG00000178852	EFCAB13	chr17:45520729:+	0.83829	0.14619	-3.41036	chr17	45520711	A	C	N/A	1	1
g.chr17:45700623A>C	ColoRect-AdenoCA_TCGA	ENSG00000141279	NPEPPS	chr17:45700574:+	0.763649	0.226846	-2.399	chr17	45700623	A	C	N/A	1	1
g.chr17:45915076T>C	Stomach-AdenoCA_TCGA	ENSG00000141295	LRRC46	chr17:45915058:-	0.388163	0.185093	-1.02718	chr17	45915076	T	C	N/A	1	1
g.chr17:46059119T>G	Bone-Leiomyo_TCGA	ENSG00000108465	CDK5RAP3	chr17:46059138:+	0.195252	0.0684992	-1.19374	chr17	46059119	T	G	N/A	1	1
g.chr17:46799100T>G	ColoRect-AdenoCA_TCGA	ENSG00000159182	PRAC1	chr17:46799107:-	0.607268	0.101192	-2.61989	chr17	46799100	T	G	N/A	1	1
g.chr17:46803777T>G	ColoRect-AdenoCA_TCGA	ENSG00000159184	HOXB13	chr17:46803760:-	0.316609	0.032525	-2.62328	chr17	46803777	T	G	N/A	1	1
g.chr17:48443068A>G	Bladder-TCC_TCGA	ENSG00000015532	MRPL27	chr17:48443104:+	0.126073	0.0297624	-1.54816	chr17	48443068	A	G	N/A	1	1
g.chr17:48563319A>C	ColoRect-AdenoCA_TCGA	ENSG00000136444	RSAD1	chr17:48563335:+	0.576897	0.115435	-2.34644	chr17	48563319	A	C	N/A	1	1
g.chr17:5287017A>C	ColoRect-AdenoCA_TCGA	ENSG00000029725	RABEP1	chr17:5287037:+	0.462024	0.067938	-2.4666	chr17	5287017	A	C	fusion	1	1
g.chr17:53041183T>G	ColoRect-AdenoCA_TCGA	ENSG00000141198	COX11	chr17:53041204:+	0.720072	0.370059	-1.47678	chr17	53041183	T	G	N/A	1	1
g.chr17:5394114A>G	Lymph-BNHL_ICGC	ENSG00000167842	MIS12	chr17:5394163:+	0.537208	0.148362	-1.89662	chr17	5394114	A	G	N/A	1	1
g.chr17:56080737T>C	Ovary-AdenoCA_TCGA	ENSG00000136450	SRSF1	chr17:56080721:-	0.865062	0.0377664	-5.09582	chr17	56080737	T	C	N/A	1	1
g.chr17:56176520A>C	ColoRect-AdenoCA_TCGA	ENSG00000264364	DYNLL2	chr17:56176536:+	0.796002	0.0248372	-5.03175	chr17	56176520	A	C	N/A	1	1
g.chr17:56178826T>C	ColoRect-AdenoCA_TCGA	ENSG00000264364	DYNLL2	chr17:56178845:+	0.707201	0.322549	-1.62391	chr17	56178826	T	C	N/A	1	1
g.chr17:56567869T>C	Lung-AdenoCA_TCGA	ENSG00000108389	MTMR4	chr17:56567827:-	0.244239	0.0678742	-1.49023	chr17	56567869	T	C	N/A	1	1
g.chr17:57684906A>C	ColoRect-AdenoCA_TCGA	ENSG00000108406	DHX40	chr17:57684924:+	0.412383	0.187301	-1.11352	chr17	57684906	A	C	N/A	1	1
g.chr17:57685697A>C	ColoRect-AdenoCA_TCGA	ENSG00000108406	DHX40	chr17:57685772:+	0.821233	0.5441	-1.34787	chr17	57685697	A	C	N/A	1	1
g.chr17:57689046A>G	Liver-HCC_ICGC	ENSG00000108406	DHX40	chr17:57689064:+	0.195805	0.073838	-1.11645	chr17	57689046	A	G	N/A	1	1
g.chr17:58027908A>C	ColoRect-AdenoCA_TCGA	ENSG00000108443	RPS6KB1	chr17:58027925:+	0.261847	0.100179	-1.15885	chr17	58027908	A	C	N/A	1	1
g.chr17:59942882T>G	ColoRect-AdenoCA_TCGA	ENSG00000108506	INTS2	chr17:59942789:-	0.93357	0.815475	-1.15688	chr17	59942882	T	G	N/A	1	1
g.chr17:60022001T>C	ColoRect-AdenoCA_TCGA	ENSG00000108510	MED13	chr17:60021949:-	0.439733	0.0345358	-3.08837	chr17	60022001	T	C	N/A	1	1
g.chr17:61909358A>G	Head-SCC_TCGA	ENSG00000087191	PSMC5	chr17:61909354:+	0.167334	0.0289473	-1.90826	chr17	61909358	A	G	N/A	1	1
g.chr17:63009533T>G	Lymph-NOS_ICGC	ENSG00000120063	GNA13	chr17:63009511:-	0.315173	0.112425	-1.29017	chr17	63009533	T	G	N/A	1	1
g.chr17:63524704T>A	Kidney-RCC_ICGC	ENSG00000168646	AXIN2	chr17:63524681:-	0.724213	0.173643	-2.52548	chr17	63524704	T	A	tsg	1	1
g.chr17:65052899A>C	ColoRect-AdenoCA_TCGA	ENSG00000108878	CACNG1	chr17:65052913:+	0.347922	0.0271228	-2.9517	chr17	65052899	A	C	N/A	1	1
g.chr17:65987233T>G	ColoRect-AdenoCA_TCGA	ENSG00000186665	C17orf58	chr17:65987215:-	0.891221	0.179155	-3.62535	chr17	65987233	T	G	N/A	1	1
g.chr17:662587T>G	ColoRect-AdenoCA_TCGA	ENSG00000167699	GLOD4	chr17:662570:-	0.43794	0.176402	-1.29139	chr17	662587	T	G	N/A	1	1
g.chr17:70121274A>G	Biliary-AdenoCA_ICGC	ENSG00000125398	SOX9	chr17:70121291:+	0.349472	0.102832	-1.54479	chr17	70121274	A	G	N/A	1	1
g.chr17:7156805A>G	Biliary-AdenoCA_ICGC	ENSG00000181885	ELP5	chr17:7156788:-	0.355225	0.0553208	-2.24155	chr17	7156805	A	G	N/A	1	1
g.chr17:7163475T>C	Breast-AdenoCa_TCGA	ENSG00000181885	CLDN7	chr17:7163415:-	0.326914	0.0554965	-2.11216	chr17	7163475	T	C	N/A	1	1
g.chr17:74541437A>C	ColoRect-AdenoCA_TCGA	ENSG00000214140	PRCD	chr17:74541458:+	0.150695	0.00189056	-4.53983	chr17	74541437	A	C	N/A	1	1
g.chr17:75213161A>G	Skin-Melanoma_ICGC	ENSG00000129657	SEC14L1	chr17:75213183:+	0.561269	0.255756	-1.31446	chr17	75213161	A	G	N/A	1	1
g.chr17:76792989T>C	Liver-HCC_ICGC	ENSG00000055483	USP36	chr17:76793041:-	0.148958	0.0397474	-1.44185	chr17	76792989	T	C	N/A	1	1
g.chr17:78367578A>C	ColoRect-AdenoCA_TCGA	ENSG00000173821	RNF213	chr17:78367598:+	0.320784	0.0623549	-1.96036	chr17	78367578	A	C	fusion	1	2
g.chr17:78367578A>G	ColoRect-AdenoCA_TCGA	ENSG00000173821	RNF213	chr17:78367598:+	0.320784	0.0554211	-2.08561	chr17	78367578	A	G	fusion	1	2
g.chr17:79202096T>C	ColoRect-AdenoCA_TCGA	ENSG00000167302	ENTHD2	chr17:79202077:-	0.522834	0.0937345	-2.36026	chr17	79202096	T	C	N/A	1	1
g.chr17:80059370T>C	Liver-HCC_ICGC	ENSG00000176155	CCDC57	chr17:80059346:-	0.0323479	0.00053901	-4.12691	chr17	80059370	T	C	N/A	1	1
g.chr17:80215271A>G	Kidney-RCC_TCGA	ENSG00000141526	CSNK1D	chr17:80215300:+	0.353863	0.0815661	-1.81916	chr17	80215271	A	G	N/A	1	1
g.chr17:80561041A>G	ColoRect-AdenoCA_TCGA	ENSG00000141568	FOXK2	chr17:80561064:+	0.188976	0.0221589	-2.33043	chr17	80561041	A	G	N/A	1	1
g.chr17:81056714A>C	ColoRect-AdenoCA_TCGA	ENSG00000176845	METRNL	chr17:81056730:+	0.0863024	0.00908865	-2.33196	chr17	81056714	A	C	N/A	1	1
g.chr18:10556109A>G	Liver-HCC_ICGC	ENSG00000134265	NAPG	chr18:10556126:+	0.193697	0.0805204	-1.00913	chr18	10556109	A	G	N/A	1	1
g.chr18:10670263T>A	Prost-AdenoCA_ICGC	ENSG00000154864	PIEZO2	chr18:10670244:-	0.54623	0.224282	-1.42634	chr18	10670263	T	A	N/A	1	1
g.chr18:12030862A>G	ColoRect-AdenoCA_TCGA	ENSG00000141401	IMPA2	chr18:12030800:+	0.524611	0.0985622	-2.31183	chr18	12030862	A	G	N/A	1	1
g.chr18:19219255T>G	ColoRect-AdenoCA_TCGA	ENSG00000167088	SNRPD1	chr18:19219274:+	0.270312	0.103428	-1.16666	chr18	19219255	T	G	N/A	1	1
g.chr18:20876238T>G	ColoRect-AdenoCA_TCGA	ENSG00000134490	TMEM241	chr18:20876242:-	0.160722	0.0508047	-1.27476	chr18	20876238	T	G	N/A	1	1
g.chr18:23596235T>C	Lung-AdenoCA_TCGA	ENSG00000141380	SS18	chr18:23596192:-	0.742359	0.184301	-2.54574	chr18	23596235	T	C	fusion	1	1
g.chr18:23597320T>G	ColoRect-AdenoCA_TCGA	ENSG00000141380	SS18	chr18:23597293:-	0.398565	0.159272	-1.25221	chr18	23597320	T	G	fusion	1	1
g.chr18:24495625T>G	Eso-AdenoCa_ICGC	ENSG00000154080	CHST9	chr18:24495590:-	0.213745	0.0812478	-1.12302	chr18	24495625	T	G	N/A	1	1
g.chr18:2537551T>G	ColoRect-AdenoCA_TCGA	ENSG00000101574	METTL4	chr18:2537529:-	0.538186	0.165123	-1.77364	chr18	2537551	T	G	N/A	1	1
g.chr18:2803121T>G	Lymph-BNHL_ICGC	ENSG00000101596	SMCHD1	chr18:2803143:+	0.357031	0.134988	-1.26929	chr18	2803121	T	G	N/A	1	1
g.chr18:29202308T>G	ColoRect-AdenoCA_TCGA	ENSG00000118276	B4GALT6	chr18:29202259:-	0.718085	0.328874	-1.64826	chr18	29202308	T	G	N/A	1	1
g.chr18:32471343T>C	Skin-Melanoma_TCGA	ENSG00000134769	DTNA	chr18:32471363:+	0.873771	0.648207	-1.32356	chr18	32471343	T	C	N/A	1	1
g.chr18:40323214T>G	Breast-AdenoCa_TCGA	ENSG00000152214	RIT2	chr18:40323180:-	0.449933	0.140572	-1.6096	chr18	40323214	T	G	N/A	1	1
g.chr18:40847877A>C	Skin-Melanoma_ICGC	ENSG00000132872	SYT4	chr18:40847826:-	0.834968	0.244465	-2.74961	chr18	40847877	A	C	N/A	1	1
g.chr18:44621997T>G	ColoRect-AdenoCA_TCGA	ENSG00000167220	KATNAL2	chr18:44621973:-	0.471018	0.112876	-1.94564	chr18	44621997	T	G	N/A	1	1
g.chr18:45364454T>G	ColoRect-AdenoCA_TCGA	ENSG00000175387	SMAD2	chr18:45364437:-	0.428595	0.184541	-1.19829	chr18	45364454	T	G	tsg	1	1
g.chr18:48514195A>G	Liver-HCC_ICGC	ENSG00000141642	ELAC1	chr18:48514218:+	0.26008	0.0558627	-1.78182	chr18	48514195	A	G	N/A	1	1
g.chr18:5143704T>C	Stomach-AdenoCA_TCGA	ENSG00000231824	C18orf42	chr18:5143682:-	0.468264	0.167692	-1.47496	chr18	5143704	T	C	N/A	1	1
g.chr18:52568761T>C	Ovary-AdenoCA_TCGA	ENSG00000166510	CCDC68	chr18:52568740:-	0.799792	0.435265	-1.64539	chr18	52568761	T	C	N/A	1	1
g.chr18:57102552T>C	Liver-HCC_ICGC	ENSG00000183287	CCBE1	chr18:57102535:-	0.262403	0.0347666	-2.2902	chr18	57102552	T	C	N/A	1	1
g.chr18:5956165T>C	Panc-AdenoCA_ICGC	ENSG00000154655	L3MBTL4	chr18:5956145:-	0.0799919	0.0108228	-2.07276	chr18	5956165	T	C	N/A	1	1
g.chr18:59711480T>G	ColoRect-AdenoCA_TCGA	ENSG00000197563	PIGN	chr18:59711457:-	0.933331	0.568792	-2.36209	chr18	59711480	T	G	N/A	1	1
g.chr18:65143439T>G	ColoRect-AdenoCA_TCGA	ENSG00000171451	DSEL	chr18:65143421:-	0.741041	0.149484	-2.79004	chr18	65143439	T	G	N/A	1	1
g.chr18:65149050T>C	Lymph-CLL_ICGC	ENSG00000171451	CTD-2541J13.1	chr18:65149028:-	0.868154	0.391468	-2.32588	chr18	65149050	T	C	N/A	1	1
g.chr18:65169029T>G	ColoRect-AdenoCA_TCGA	ENSG00000171451	DSEL	chr18:65169013:-	0.373255	0.144069	-1.26361	chr18	65169029	T	G	N/A	1	1
g.chr18:74063620T>G	ColoRect-AdenoCA_TCGA	ENSG00000101493	ZNF516	chr18:74063601:-	0.771077	0.220762	-2.47564	chr18	74063620	T	G	N/A	1	1
g.chr18:8639235A>G	Bone-Leiomyo_TCGA	ENSG00000206418	RAB12	chr18:8639267:+	0.268389	0.087706	-1.33916	chr18	8639235	A	G	N/A	1	1
g.chr18:912154A>C	ColoRect-AdenoCA_TCGA	ENSG00000141433	ADCYAP1	chr18:912170:+	0.499548	0.239329	-1.15456	chr18	912154	A	C	N/A	1	2
g.chr18:912155A>T	ColoRect-AdenoCA_TCGA	ENSG00000141433	ADCYAP1	chr18:912170:+	0.499548	0.212367	-1.30891	chr18	912155	A	T	N/A	1	2
g.chr18:9134310A>C	ColoRect-AdenoCA_TCGA	ENSG00000178127	NDUFV2	chr18:9134333:+	0.534527	0.099027	-2.34641	chr18	9134310	A	C	N/A	1	1
g.chr18:9955202A>G	Panc-Endocrine_ICGC	ENSG00000101558	VAPA	chr18:9955226:+	0.389548	0.0415386	-2.68949	chr18	9955202	A	G	N/A	1	1
g.chr19:10226023A>G	Breast-AdenoCa_TCGA	ENSG00000244165	P2RY11	chr19:10226065:+	0.262873	0.015561	-3.11621	chr19	10226023	A	G	N/A	1	1
g.chr19:10460237T>G	ColoRect-AdenoCA_TCGA	ENSG00000105397	TYK2	chr19:10460208:-	0.677258	0.35457	-1.34021	chr19	10460237	T	G	N/A	1	1
g.chr19:10623640T>G	ColoRect-AdenoCA_TCGA	ENSG00000180739	S1PR5	chr19:10623706:-	0.490978	0.10514	-2.10528	chr19	10623640	T	G	N/A	1	1
g.chr19:10944145T>C	Liver-HCC_ICGC	ENSG00000079805	TMED1	chr19:10944188:+	0.300032	0.0477654	-2.14537	chr19	10944145	T	C	tsg	1	1
g.chr19:11487900T>A	Lung-SCC_TCGA	ENSG00000187266	EPOR	chr19:11487883:-	0.194187	0.0668405	-1.21323	chr19	11487900	T	A	N/A	1	1
g.chr19:11563045T>G	ColoRect-AdenoCA_TCGA	ENSG00000196361	ELAVL3	chr19:11563027:-	0.219789	0.0595643	-1.49239	chr19	11563045	T	G	N/A	1	1
g.chr19:11663875T>C	Liver-HCC_ICGC	ENSG00000130165	ELOF1	chr19:11663861:-	0.495678	0.0393465	-3.17792	chr19	11663875	T	C	N/A	1	1
g.chr19:12025346A>C	ColoRect-AdenoCA_TCGA	ENSG00000198429	ZNF69	chr19:12025366:+	0.42313	0.185453	-1.1699	chr19	12025346	A	C	N/A	1	1
g.chr19:12192357A>C	ColoRect-AdenoCA_TCGA	ENSG00000223547	ZNF844	chr19:12192375:+	0.648232	0.191735	-2.05005	chr19	12192357	A	C	N/A	1	1
g.chr19:12635741T>A	Stomach-AdenoCA_TCGA	ENSG00000249709	ZNF709	chr19:12635716:-	0.185721	0.0455777	-1.56363	chr19	12635741	T	A	N/A	1	1
g.chr19:12686938T>C	Liver-HCC_TCGA	ENSG00000188033	ZNF490	chr19:12686914:-	0.565254	0.137993	-2.09458	chr19	12686938	T	C	N/A	1	1
g.chr19:14072239A>C	ColoRect-AdenoCA_TCGA	ENSG00000132017	DCAF15	chr19:14072256:+	0.275653	0.0904129	-1.34248	chr19	14072239	A	C	N/A	1	1
g.chr19:14202519T>G	Liver-HCC_ICGC	ENSG00000072062	PRKACA	chr19:14202437:-	0.828393	0.154624	-3.27307	chr19	14202519	T	G	oncogene	1	1
g.chr19:14625601T>G	Ovary-AdenoCA_ICGC	ENSG00000132002	DNAJB1	chr19:14625581:-	0.339628	0.0614803	-2.06064	chr19	14625601	T	G	fusion	1	1
g.chr19:15531093T>G	ColoRect-AdenoCA_TCGA	ENSG00000011451	AKAP8L	chr19:15531075:-	0.133307	0.0352574	-1.43715	chr19	15531093	T	G	N/A	1	1
g.chr19:15770913A>T	Stomach-AdenoCA_TCGA	ENSG00000186529	CYP4F3	chr19:15770936:+	0.364629	0.114995	-1.48537	chr19	15770913	A	T	N/A	1	1
g.chr19:17398435A>C	Panc-AdenoCA_ICGC	ENSG00000160117	ANKLE1	chr19:17398455:+	0.763643	0.208537	-2.50652	chr19	17398435	A	C	N/A	1	1
g.chr19:17417630T>G	Biliary-AdenoCA_ICGC	ENSG00000130312	MRPL34	chr19:17417579:+	0.900355	0.597701	-1.80528	chr19	17417630	T	G	N/A	1	1
g.chr19:18124250A>T	Skin-Melanoma_ICGC	ENSG00000105643	ARRDC2	chr19:18124269:+	0.0892914	0.0218549	-1.47892	chr19	18124250	A	T	N/A	1	1
g.chr19:18686021A>G	Liver-HCC_ICGC	ENSG00000221983	UBA52	chr19:18685997:+	0.0775173	0.00437588	-2.95069	chr19	18686021	A	G	N/A	1	1
g.chr19:18704065T>C	ColoRect-AdenoCA_TCGA	ENSG00000006016	CRLF1	chr19:18704047:-	0.187773	0.0113131	-3.00587	chr19	18704065	T	C	N/A	1	1
g.chr19:19040574A>G	Liver-HCC_ICGC	ENSG00000105671	HOMER3	chr19:19040595:+	0.16481	0.0548239	-1.22438	chr19	19040574	A	G	N/A	1	1
g.chr19:19363026A>T	ColoRect-AdenoCA_TCGA	ENSG00000130287	NCAN	chr19:19363042:+	0.685142	0.0561013	-3.60037	chr19	19363026	A	T	N/A	1	1
g.chr19:19625048T>C	Eso-AdenoCa_ICGC	ENSG00000178093	NDUFA13	chr19:19625028:-	0.0630155	0.00816494	-2.10042	chr19	19625048	T	C	N/A	1	1
g.chr19:20007945A>G	Liver-HCC_ICGC	ENSG00000256771	ZNF253	chr19:20007969:+	0.267933	0.0584957	-1.77339	chr19	20007945	A	G	N/A	1	1
g.chr19:20312114A>C	ColoRect-AdenoCA_TCGA	ENSG00000256229	ZNF486	chr19:20312140:+	0.620386	0.165546	-2.10871	chr19	20312114	A	C	N/A	1	1
g.chr19:2277171A>G	ColoRect-AdenoCA_TCGA	ENSG00000104904	C19orf35	chr19:2277192:+	0.65707	0.157277	-2.32889	chr19	2277171	A	G	N/A	1	1
g.chr19:23515028T>C	Liver-HCC_ICGC	ENSG00000167232	ZNF91	chr19:23515006:-	0.708333	0.189403	-2.34119	chr19	23515028	T	C	N/A	1	1
g.chr19:23922019T>G	ColoRect-AdenoCA_TCGA	ENSG00000196172	ZNF681	chr19:23921997:-	0.73904	0.256754	-2.10389	chr19	23922019	T	G	N/A	1	1
g.chr19:24312847A>C	ColoRect-AdenoCA_TCGA	ENSG00000213096	ZNF254	chr19:24312870:+	0.398373	0.143524	-1.37407	chr19	24312847	A	C	N/A	1	1
g.chr19:30534302A>T	Panc-AdenoCA_ICGC	ENSG00000105176	URI1	chr19:30534318:+	0.2265	0.0085924	-3.52007	chr19	30534302	A	T	N/A	1	1
g.chr19:33468385T>C	Skin-Melanoma_ICGC	ENSG00000131944	C19orf40	chr19:33468401:+	0.30935	0.0758948	-1.69632	chr19	33468385	T	C	N/A	1	1
g.chr19:34960775A>G	ColoRect-AdenoCA_TCGA	ENSG00000126261	UBA2	chr19:34960796:+	0.5777	0.141337	-2.11757	chr19	34960775	A	G	N/A	1	1
g.chr19:34997367A>C	ColoRect-AdenoCA_TCGA	ENSG00000142279	WTIP	chr19:34997384:+	0.30758	0.0198344	-3.08885	chr19	34997367	A	C	N/A	1	1
g.chr19:35517356A>C	Stomach-AdenoCA_TCGA	ENSG00000089351	GRAMD1A	chr19:35517373:+	0.17745	0.0419518	-1.59466	chr19	35517356	A	C	N/A	1	1
g.chr19:36494046T>C	ColoRect-AdenoCA_TCGA	ENSG00000205138	SYNE4	chr19:36494063:+	0.110464	0.00701708	-2.86636	chr19	36494046	T	C	N/A	1	1
g.chr19:37034541T>C	ColoRect-AdenoCA_TCGA	ENSG00000186020	ZNF529	chr19:37034515:-	0.706755	0.199663	-2.26808	chr19	37034541	T	C	N/A	1	1
g.chr19:38121926T>G	ColoRect-AdenoCA_TCGA	ENSG00000120784	ZFP30	chr19:38121907:-	0.30446	0.0874302	-1.51927	chr19	38121926	T	G	N/A	1	1
g.chr19:38220399T>C	Myeloid-MPN_ICGC	ENSG00000189144	CTD-2528L19.6	chr19:38220381:-	0.464352	0.211638	-1.17224	chr19	38220399	T	C	N/A	1	1
g.chr19:40353984T>C	Skin-Melanoma_TCGA	ENSG00000090920	FCGBP	chr19:40353969:-	0.805926	0.121587	-3.40124	chr19	40353984	T	C	N/A	1	1
g.chr19:40738261T>G	ColoRect-AdenoCA_TCGA	ENSG00000105221	AKT2	chr19:40738162:-	0.256077	0.00966925	-3.56263	chr19	40738261	T	G	oncogene	1	1
g.chr19:42379912A>C	ColoRect-AdenoCA_TCGA	ENSG00000105372	CD79A	chr19:42379934:+	0.680805	0.180189	-2.27254	chr19	42379912	A	C	N/A	1	1
g.chr19:42587223A>G	ColoRect-AdenoCA_TCGA	ENSG00000105732	ZNF574	chr19:42587245:+	0.224181	0.0770125	-1.24218	chr19	42587223	A	G	N/A	1	1
g.chr19:42905679T>G	ColoRect-AdenoCA_TCGA	ENSG00000079435	LIPE	chr19:42905666:-	0.161552	0.0235877	-2.07644	chr19	42905679	T	G	N/A	1	1
g.chr19:44232164T>A	Kidney-RCC_ICGC	ENSG00000105771	SMG9	chr19:44232135:-	0.293914	0.0988319	-1.33382	chr19	44232164	T	A	N/A	1	2
g.chr19:44232165T>C	ColoRect-AdenoCA_TCGA	ENSG00000105771	SMG9	chr19:44232135:-	0.293914	0.0759903	-1.62166	chr19	44232165	T	C	N/A	1	2
g.chr19:44376531T>A	ColoRect-AdenoCA_TCGA	ENSG00000176222	ZNF404	chr19:44376517:-	0.594914	0.223641	-1.62889	chr19	44376531	T	A	N/A	1	1
g.chr19:44482791A>G	Lung-SCC_TCGA	ENSG00000159905	ZNF221	chr19:44482815:+	0.60093	0.147641	-2.16256	chr19	44482791	A	G	N/A	1	1
g.chr19:44613961A>C	ColoRect-AdenoCA_TCGA	ENSG00000267680	ZNF224	chr19:44614039:+	0.739281	0.390016	-1.48948	chr19	44613961	A	C	N/A	1	1
g.chr19:45303867A>G	Liver-HCC_ICGC	ENSG00000142273	CBLC	chr19:45303891:+	0.0432771	0.00275917	-2.79417	chr19	45303867	A	G	both	1	1
g.chr19:4542622T>C	Liver-HCC_ICGC	ENSG00000167680	SEMA6B	chr19:4542605:-	0.401451	0.0396055	-2.78895	chr19	4542622	T	C	N/A	1	1
g.chr19:46386893T>C	Liver-HCC_ICGC	ENSG00000170604	IRF2BP1	chr19:46386866:-	0.323436	0.102975	-1.42658	chr19	46386893	T	C	N/A	1	1
g.chr19:46393298T>G	ColoRect-AdenoCA_TCGA	ENSG00000176182	MYPOP	chr19:46393281:-	0.722761	0.22332	-2.20463	chr19	46393298	T	G	N/A	1	1
g.chr19:48835632T>G	ColoRect-AdenoCA_TCGA	ENSG00000161558	TMEM143	chr19:48835613:-	0.499775	0.0915463	-2.294	chr19	48835632	T	G	N/A	1	1
g.chr19:49208994T>A	ColoRect-AdenoCA_TCGA	ENSG00000176909	FUT2	chr19:49208975:-	0.213454	0.0474785	-1.69461	chr19	49208994	T	A	N/A	1	1
g.chr19:49379299A>C	ColoRect-AdenoCA_TCGA	ENSG00000087074	PPP1R15A	chr19:49379315:+	0.696425	0.0949869	-3.08454	chr19	49379299	A	C	N/A	1	1
g.chr19:50138569A>C	Panc-AdenoCA_ICGC	ENSG00000126458	RRAS	chr19:50138549:-	0.214826	0.0398629	-1.88555	chr19	50138569	A	C	N/A	1	1
g.chr19:50141250A>C	ColoRect-AdenoCA_TCGA	ENSG00000126464	RRAS	chr19:50141274:+	0.154751	0.0210616	-2.14121	chr19	50141250	A	C	N/A	1	1
g.chr19:50164461T>G	ColoRect-AdenoCA_TCGA	ENSG00000126461	IRF3	chr19:50164485:+	0.166931	0.0283713	-1.92606	chr19	50164461	T	G	N/A	1	1
g.chr19:50193813A>C	ColoRect-AdenoCA_TCGA	ENSG00000224420	ADM5	chr19:50193832:+	0.0909828	0.0275408	-1.26246	chr19	50193813	A	C	N/A	1	1
g.chr19:51834963T>C	Prost-AdenoCA_ICGC	ENSG00000186806	VSIG10L	chr19:51834944:-	0.323349	0.0332131	-2.63261	chr19	51834963	T	C	N/A	1	1
g.chr19:52357252T>C	Panc-Endocrine_ICGC	ENSG00000161551	ZNF577	chr19:52357235:-	0.506268	0.0930011	-2.3026	chr19	52357252	T	C	N/A	1	1
g.chr19:52535563A>C	Skin-Melanoma_TCGA	ENSG00000256087	ZNF432	chr19:52535542:-	0.781345	0.0902499	-3.58411	chr19	52535563	A	C	N/A	1	1
g.chr19:52615384T>A	CNS-Oligo_TCGA	ENSG00000204611	ZNF616	chr19:52615365:-	0.914221	0.324209	-3.10079	chr19	52615384	T	A	N/A	1	1
g.chr19:52872051A>C	ColoRect-AdenoCA_TCGA	ENSG00000167554	ZNF880	chr19:52872074:+	0.408677	0.115746	-1.6639	chr19	52872051	A	C	N/A	1	1
g.chr19:53300683T>G	ColoRect-AdenoCA_TCGA	ENSG00000198538	ZNF28	chr19:53300661:-	0.700878	0.0881793	-3.18755	chr19	53300683	T	G	N/A	1	1
g.chr19:53362762T>G	ColoRect-AdenoCA_TCGA	ENSG00000182986	ZNF468	chr19:53362744:-	0.616675	0.308312	-1.28348	chr19	53362762	T	G	N/A	1	1
g.chr19:53519360A>T	Lung-SCC_TCGA	ENSG00000269526	ERVV-1	chr19:53519380:+	0.86148	0.647035	-1.22161	chr19	53519360	A	T	N/A	1	1
g.chr19:53568153T>C	Skin-Melanoma_ICGC	ENSG00000170949	ZNF160	chr19:53568135:-	0.944719	0.281128	-3.77733	chr19	53568153	T	C	N/A	1	1
g.chr19:56219987T>G	Uterus-AdenoCA_TCGA	ENSG00000063245	NLRP9	chr19:56220012:+	0.307815	0.108521	-1.29559	chr19	56219987	T	G	N/A	1	1
g.chr19:57280481T>G	Liver-HCC_ICGC	ENSG00000269699	AC006115.3	chr19:57280457:-	0.594518	0.172504	-1.95066	chr19	57280481	T	G	N/A	1	1
g.chr19:57282595T>G	ColoRect-AdenoCA_TCGA	ENSG00000269699	AC006115.3	chr19:57282578:-	0.922544	0.607051	-2.0425	chr19	57282595	T	G	N/A	1	1
g.chr19:58006016A>C	ColoRect-AdenoCA_TCGA	ENSG00000105136	ZNF419	chr19:58006032:+	0.611183	0.247316	-1.56527	chr19	58006016	A	C	N/A	1	1
g.chr19:58858247A>G	ColoRect-AdenoCA_TCGA	ENSG00000121410	A1BG	chr19:58858220:-	0.112359	0.0135811	-2.21853	chr19	58858247	A	G	N/A	1	1
g.chr19:58940023T>G	ColoRect-AdenoCA_TCGA	ENSG00000131849	CTD-2619J13.17	chr19:58940006:-	0.439457	0.169836	-1.34342	chr19	58940023	T	G	N/A	1	1
g.chr19:617246T>C	Panc-AdenoCA_ICGC	ENSG00000099821	POLRMT	chr19:617197:-	0.528042	0.121781	-2.08796	chr19	617246	T	C	N/A	1	1
g.chr19:6413134T>A	Panc-Endocrine_ICGC	ENSG00000088247	KHSRP	chr19:6413113:-	0.694312	0.231993	-2.01745	chr19	6413134	T	A	N/A	1	1
g.chr19:6661288T>C	Breast-AdenoCa_TCGA	ENSG00000125735	TNFSF14	chr19:6661264:-	0.534178	0.145038	-1.91098	chr19	6661288	T	C	N/A	1	1
g.chr19:7966881T>G	Liver-HCC_ICGC	ENSG00000171017	LRRC8E	chr19:7966901:+	0.757757	0.121066	-3.12279	chr19	7966881	T	G	N/A	1	1
g.chr19:7979342T>G	Lung-SCC_TCGA	ENSG00000076984	MAP2K7	chr19:7979363:+	0.884656	0.229741	-3.24705	chr19	7979342	T	G	N/A	1	1
g.chr19:9719148T>G	ColoRect-AdenoCA_TCGA	ENSG00000171469	ZNF561	chr19:9719131:-	0.336294	0.100871	-1.50774	chr19	9719148	T	G	N/A	1	1
g.chr19:9720747T>C	Stomach-AdenoCA_TCGA	ENSG00000171469	ZNF561	chr19:9720727:-	0.241856	0.0291328	-2.36379	chr19	9720747	T	C	N/A	1	1
g.chr19:9759760A>C	Bladder-TCC_TCGA	ENSG00000171466	ZNF562	chr19:9759737:-	0.570814	0.112664	-2.34899	chr19	9759760	A	C	N/A	1	1
g.chr19:998421A>C	ColoRect-AdenoCA_TCGA	ENSG00000065268	GRIN3B	chr19:998437:+	0.654896	0.172464	-2.2089	chr19	998421	A	C	N/A	1	1
g.chr1:10046223A>C	ColoRect-AdenoCA_TCGA	ENSG00000173614	NMNAT1	chr1:10046238:+	0.314524	0.101229	-1.40459	chr1	10046223	A	C	N/A	1	1
g.chr1:101455202T>G	Uterus-AdenoCA_TCGA	ENSG00000117543	DPH5	chr1:101455179:-	0.751605	0.183784	-2.59811	chr1	101455202	T	G	N/A	1	1
g.chr1:103343207T>C	Liver-HCC_ICGC	ENSG00000060718	COL11A1	chr1:103343182:-	0.605207	0.18613	-1.90257	chr1	103343207	T	C	N/A	1	1
g.chr1:109474939T>G	ColoRect-AdenoCA_TCGA	ENSG00000121940	GPSM2	chr1:109474918:-	0.48603	0.0983943	-2.1593	chr1	109474939	T	G	N/A	1	1
g.chr1:110088435A>C	ColoRect-AdenoCA_TCGA	ENSG00000156097	GPR61	chr1:110088453:+	0.469692	0.22448	-1.11837	chr1	110088435	A	C	N/A	1	1
g.chr1:110791279A>C	ColoRect-AdenoCA_TCGA	ENSG00000116396	KCNC4	chr1:110791306:+	0.656595	0.231579	-1.84758	chr1	110791279	A	C	N/A	1	1
g.chr1:110899676A>C	Skin-Melanoma_ICGC	ENSG00000162775	RBM15	chr1:110899693:+	0.55605	0.169318	-1.81561	chr1	110899676	A	C	fusion	1	1
g.chr1:114230033A>C	Liver-HCC_ICGC	ENSG00000081026	MAGI3	chr1:114230054:+	0.310865	0.0697931	-1.79379	chr1	114230033	A	C	N/A	1	1
g.chr1:114456931A>C	ColoRect-AdenoCA_TCGA	ENSG00000118655	DCLRE1B	chr1:114456956:+	0.30099	0.0697506	-1.74794	chr1	114456931	A	C	N/A	1	1
g.chr1:115259561T>A	Breast-AdenoCa_TCGA	ENSG00000009307	CSDE1	chr1:115259622:-	0.395889	0.0098851	-4.18417	chr1	115259561	T	A	N/A	1	1
g.chr1:115312124T>C	Liver-HCC_ICGC	ENSG00000052723	SIKE1	chr1:115312100:-	0.744156	0.402203	-1.46398	chr1	115312124	T	C	N/A	1	1
g.chr1:116236584A>G	Lymph-BNHL_ICGC	ENSG00000173218	VANGL1	chr1:116236610:+	0.207863	0.0514034	-1.57742	chr1	116236584	A	G	N/A	1	1
g.chr1:117650357T>G	ColoRect-AdenoCA_TCGA	ENSG00000134253	TTF2	chr1:117650339:-	0.442673	0.0994762	-1.97274	chr1	117650357	T	G	N/A	1	1
g.chr1:118068548A>G	Liver-HCC_ICGC	ENSG00000198162	MAN1A2	chr1:118068572:+	0.316354	0.125665	-1.16926	chr1	118068548	A	G	N/A	1	2
g.chr1:118068549T>G	Breast-AdenoCa_ICGC	ENSG00000198162	MAN1A2	chr1:118068572:+	0.316354	0.062331	-1.94036	chr1	118068549	T	G	N/A	1	2
g.chr1:11810809A>C	ColoRect-AdenoCA_TCGA	ENSG00000177674	AGTRAP	chr1:11810826:+	0.0940547	0.00478071	-3.07327	chr1	11810809	A	C	N/A	1	1
g.chr1:1185245T>C	Liver-HCC_ICGC	ENSG00000160087	RP5-902P8.12	chr1:1185157:-	0.211515	0.0329971	-2.06196	chr1	1185245	T	C	N/A	1	1
g.chr1:119425687A>T	Panc-AdenoCA_ICGC	ENSG00000092607	TBX15	chr1:119425637:-	0.504283	0.103051	-2.18091	chr1	119425687	A	T	N/A	1	1
g.chr1:120454821A>G	Head-SCC_TCGA	ENSG00000134250	NOTCH2	chr1:120454800:-	0.528276	0.235227	-1.29225	chr1	120454821	A	G	both	1	1
g.chr1:145591478T>G	ColoRect-AdenoCA_TCGA	ENSG00000186141	NUDT17	chr1:145591459:-	0.452943	0.19035	-1.25895	chr1	145591478	T	G	N/A	1	2
g.chr1:145591482T>A	Kidney-RCC_TCGA	ENSG00000186141	NUDT17	chr1:145591459:-	0.452943	0.231049	-1.01361	chr1	145591482	T	A	N/A	1	2
g.chr1:146767428A>C	ColoRect-AdenoCA_TCGA	ENSG00000131778	CHD1L	chr1:146767391:+	0.386329	0.0812488	-1.96273	chr1	146767428	A	C	N/A	1	1
g.chr1:149856028T>G	ColoRect-AdenoCA_TCGA	ENSG00000184678	HIST2H2BE	chr1:149856009:-	0.911014	0.480912	-2.40247	chr1	149856028	T	G	N/A	1	1
g.chr1:149858913A>C	Lymph-BNHL_ICGC	ENSG00000184260	HIST2H2AC	chr1:149858962:+	0.322195	0.0619211	-1.97427	chr1	149858913	A	C	N/A	1	1
g.chr1:150190743A>G	Breast-AdenoCa_TCGA	ENSG00000143401	ANP32E	chr1:150190723:-	0.832339	0.140871	-3.41037	chr1	150190743	A	G	N/A	1	1
g.chr1:150192700T>G	ColoRect-AdenoCA_TCGA	ENSG00000143401	ANP32E	chr1:150192680:-	0.713649	0.036799	-4.17796	chr1	150192700	T	G	N/A	1	1
g.chr1:150547050A>G	ColoRect-AdenoCA_TCGA	ENSG00000143384	MCL1	chr1:150547034:-	0.940687	0.397805	-3.17841	chr1	150547050	A	G	N/A	1	1
g.chr1:150586843T>G	Biliary-AdenoCA_ICGC	ENSG00000143420	ENSA	chr1:150586819:-	0.429397	0.155795	-1.40554	chr1	150586843	T	G	N/A	1	2
g.chr1:150586846T>G	ColoRect-AdenoCA_TCGA	ENSG00000143420	ENSA	chr1:150586819:-	0.429397	0.0512263	-2.63461	chr1	150586846	T	G	N/A	1	2
g.chr1:151743789T>C	Panc-AdenoCA_ICGC	ENSG00000143450	TDRKH	chr1:151743806:+	0.390818	0.0188454	-3.50859	chr1	151743789	T	C	N/A	1	1
g.chr1:153302615T>G	ColoRect-AdenoCA_TCGA	ENSG00000163218	PGLYRP4	chr1:153302596:-	0.236175	0.0813669	-1.25015	chr1	153302615	T	G	N/A	1	1
g.chr1:153947002T>C	Lung-AdenoCA_TCGA	ENSG00000143543	JTB	chr1:153946989:-	0.225481	0.0688731	-1.37012	chr1	153947002	T	C	N/A	1	1
g.chr1:15817909T>C	ColoRect-AdenoCA_TCGA	ENSG00000132906	CASP9	chr1:15817896:-	0.269837	0.0564674	-1.82052	chr1	15817909	T	C	tsg	1	1
g.chr1:15898214T>G	ColoRect-AdenoCA_TCGA	ENSG00000116771	DNAJC16	chr1:15898267:-	0.173572	0.0501436	-1.3809	chr1	15898214	T	G	N/A	1	1
g.chr1:159896850T>G	Lung-SCC_TCGA	ENSG00000085552	IGSF9	chr1:159896831:-	0.744076	0.375524	-1.57585	chr1	159896850	T	G	N/A	1	1
g.chr1:160328722A>G	Biliary-AdenoCA_ICGC	ENSG00000162736	NCSTN	chr1:160328661:+	0.23488	0.0186509	-2.78208	chr1	160328722	A	G	N/A	1	1
g.chr1:160329420A>T	Panc-Endocrine_ICGC	ENSG00000162736	NCSTN	chr1:160329438:+	0.146993	0.0108831	-2.75122	chr1	160329420	A	T	N/A	1	1
g.chr1:163115704T>G	ColoRect-AdenoCA_TCGA	ENSG00000143248	RGS5	chr1:163115682:-	0.445548	0.14314	-1.57078	chr1	163115704	T	G	N/A	1	1
g.chr1:165693445T>C	ColoRect-AdenoCA_TCGA	ENSG00000143183	TMCO1	chr1:165693419:-	0.448161	0.0830219	-2.19388	chr1	165693445	T	C	N/A	1	1
g.chr1:165889756A>C	ColoRect-AdenoCA_TCGA	ENSG00000143179	UCK2	chr1:165889773:+	0.464717	0.0886001	-2.18948	chr1	165889756	A	C	N/A	1	1
g.chr1:169364131T>G	ColoRect-AdenoCA_TCGA	ENSG00000117477	CCDC181	chr1:169364108:-	0.746253	0.214651	-2.37584	chr1	169364131	T	G	N/A	1	1
g.chr1:1718208T>G	ColoRect-AdenoCA_TCGA	ENSG00000078369	GNB1	chr1:1718188:-	0.432743	0.149141	-1.47069	chr1	1718208	T	G	N/A	1	1
g.chr1:173754966A>C	Lymph-BNHL_ICGC	ENSG00000076321	KLHL20	chr1:173754985:+	0.303867	0.089022	-1.49669	chr1	173754966	A	C	N/A	1	1
g.chr1:180929794T>G	ColoRect-AdenoCA_TCGA	ENSG00000135823	RP11-46A10.5	chr1:180929764:-	0.366646	0.0669266	-2.08825	chr1	180929794	T	G	N/A	1	1
g.chr1:180942186T>G	Liver-HCC_TCGA	ENSG00000135823	STX6	chr1:180942164:-	0.453974	0.167264	-1.42052	chr1	180942186	T	G	N/A	1	1
g.chr1:185257380T>G	ColoRect-AdenoCA_TCGA	ENSG00000116679	SWT1	chr1:185257364:-	0.637865	0.1705	-2.1482	chr1	185257380	T	G	N/A	1	1
g.chr1:185260610T>C	Liver-HCC_ICGC	ENSG00000116668	SWT1	chr1:185260627:+	0.568625	0.0926731	-2.55767	chr1	185260610	T	C	N/A	1	1
g.chr1:186641556A>T	Liver-HCC_ICGC	ENSG00000073756	PTGS2	chr1:186641538:-	0.483491	0.162191	-1.57596	chr1	186641556	A	T	N/A	1	1
g.chr1:192983477T>G	ColoRect-AdenoCA_TCGA	ENSG00000116750	UCHL5	chr1:192983462:-	0.809917	0.165273	-3.06897	chr1	192983477	T	G	N/A	1	1
g.chr1:197124272A>G	ColoRect-AdenoCA_TCGA	ENSG00000177888	ZBTB41	chr1:197124251:-	0.894993	0.333362	-2.8358	chr1	197124272	A	G	N/A	1	1
g.chr1:197447568A>C	ColoRect-AdenoCA_TCGA	ENSG00000134376	CRB1	chr1:197447585:+	0.517542	0.204849	-1.42645	chr1	197447568	A	C	N/A	1	1
g.chr1:201849324A>G	Stomach-AdenoCA_TCGA	ENSG00000198700	IPO9	chr1:201849349:+	0.683294	0.343864	-1.41507	chr1	201849324	A	G	N/A	1	1
g.chr1:201854263T>C	ColoRect-AdenoCA_TCGA	ENSG00000198700	IPO9	chr1:201854286:+	0.0688552	0.016159	-1.50458	chr1	201854263	T	C	N/A	1	1
g.chr1:203839184A>T	Skin-Melanoma_TCGA	ENSG00000182004	SNRPE	chr1:203839178:+	0.354894	0.111362	-1.47931	chr1	203839184	A	T	N/A	1	1
g.chr1:204363109T>C	Liver-HCC_ICGC	ENSG00000158615	RP11-739N20.2	chr1:204363080:-	0.871552	0.326137	-2.64046	chr1	204363109	T	C	N/A	1	1
g.chr1:207534293A>G	Panc-AdenoCA_ICGC	ENSG00000196352	CD55	chr1:207534311:+	0.715642	0.154402	-2.62343	chr1	207534293	A	G	N/A	1	1
g.chr1:207966984A>C	Skin-Melanoma_ICGC	ENSG00000117335	CD46	chr1:207967001:+	0.164156	0.028131	-1.91472	chr1	207966984	A	C	N/A	1	1
g.chr1:21069191T>G	ColoRect-AdenoCA_TCGA	ENSG00000127483	HP1BP3	chr1:21069172:-	0.708675	0.283098	-1.81811	chr1	21069191	T	G	N/A	1	1
g.chr1:211916816T>G	Eso-AdenoCa_ICGC	ENSG00000123684	LPGAT1	chr1:211916799:-	0.525648	0.149802	-1.83884	chr1	211916816	T	G	N/A	1	1
g.chr1:212111631T>G	Liver-HCC_ICGC	ENSG00000143493	INTS7	chr1:212111601:-	0.233808	0.0637771	-1.49953	chr1	212111631	T	G	N/A	1	1
g.chr1:214837890A>G	ColoRect-AdenoCA_TCGA	ENSG00000117724	CENPF	chr1:214837914:+	0.47868	0.0773503	-2.39358	chr1	214837890	A	G	N/A	1	1
g.chr1:215796256T>A	Eso-AdenoCa_ICGC	ENSG00000042781	USH2A	chr1:215796233:-	0.93114	0.484773	-2.66526	chr1	215796256	T	A	N/A	1	1
g.chr1:218041142A>C	ColoRect-AdenoCA_TCGA	ENSG00000162814	SPATA17	chr1:218041160:+	0.470616	0.142723	-1.67518	chr1	218041142	A	C	N/A	1	1
g.chr1:218511300A>C	Panc-AdenoCA_ICGC	ENSG00000067533	RRP15	chr1:218511322:+	0.958013	0.692441	-2.31595	chr1	218511300	A	C	N/A	1	1
g.chr1:221058376A>G	Liver-HCC_ICGC	ENSG00000136630	HLX	chr1:221058401:+	0.31967	0.10971	-1.33842	chr1	221058376	A	G	N/A	1	1
g.chr1:224346980A>C	ColoRect-AdenoCA_TCGA	ENSG00000143756	FBXO28	chr1:224347011:+	0.417791	0.139235	-1.48981	chr1	224346980	A	C	N/A	1	1
g.chr1:225589366A>C	Myeloid-MPN_ICGC	ENSG00000143815	LBR	chr1:225589348:-	0.106163	0.0402678	-1.04055	chr1	225589366	A	C	N/A	1	1
g.chr1:226172913A>G	Kidney-RCC_ICGC	ENSG00000143751	SDE2	chr1:226172887:-	0.429344	0.100922	-1.90249	chr1	226172913	A	G	N/A	1	1
g.chr1:227181469T>C	ColoRect-AdenoCA_TCGA	ENSG00000143776	CDC42BPA	chr1:227181448:-	0.417829	0.123192	-1.63086	chr1	227181469	T	C	N/A	1	1
g.chr1:229652605T>G	ColoRect-AdenoCA_TCGA	ENSG00000135776	ABCB10	chr1:229652589:-	0.593522	0.316687	-1.14758	chr1	229652605	T	G	N/A	1	1
g.chr1:22974583A>G	ColoRect-AdenoCA_TCGA	ENSG00000159189	C1QC	chr1:22974599:+	0.877645	0.303767	-2.79974	chr1	22974583	A	G	N/A	1	1
g.chr1:230837907T>G	ColoRect-AdenoCA_TCGA	ENSG00000135744	AGT	chr1:230837887:-	0.477105	0.223324	-1.15476	chr1	230837907	T	G	N/A	1	1
g.chr1:231359671T>G	ColoRect-AdenoCA_TCGA	ENSG00000143633	C1orf131	chr1:231359653:-	0.309511	0.121456	-1.17631	chr1	231359671	T	G	N/A	1	1
g.chr1:231498174A>G	Ovary-AdenoCA_ICGC	ENSG00000010072	EGLN1	chr1:231498190:+	0.387534	0.0808865	-1.97267	chr1	231498174	A	G	N/A	1	1
g.chr1:232533738T>C	Stomach-AdenoCA_TCGA	ENSG00000116991	SIPA1L2	chr1:232533711:-	0.179363	0.0481148	-1.46419	chr1	232533738	T	C	N/A	1	1
g.chr1:232944492A>G	Liver-HCC_ICGC	ENSG00000212916	MAP10	chr1:232944514:+	0.608813	0.00672516	-5.43748	chr1	232944492	A	G	N/A	1	1
g.chr1:233520861A>G	Lung-SCC_TCGA	ENSG00000143674	MLK4	chr1:233520894:+	0.775919	0.32769	-1.96069	chr1	233520861	A	G	N/A	1	1
g.chr1:23407641T>G	ColoRect-AdenoCA_TCGA	ENSG00000169641	KDM1A	chr1:23407624:-	0.187266	0.0397792	-1.71594	chr1	23407641	T	G	N/A	1	1
g.chr1:235274927A>G	Skin-Melanoma_TCGA	ENSG00000173726	TOMM20	chr1:235274879:-	0.306089	0.00381069	-4.74766	chr1	235274927	A	G	N/A	1	1
g.chr1:236703422T>C	Ovary-AdenoCA_ICGC	ENSG00000119285	LGALS8	chr1:236703396:-	0.65023	0.266204	-1.63402	chr1	236703422	T	C	N/A	1	1
g.chr1:23752760T>G	ColoRect-AdenoCA_TCGA	ENSG00000088280	TCEA3	chr1:23752741:-	0.103673	0.0254816	-1.48692	chr1	23752760	T	G	N/A	1	1
g.chr1:240073128A>C	ColoRect-AdenoCA_TCGA	ENSG00000133019	CHRM3	chr1:240073143:+	0.585645	0.160278	-2.00215	chr1	240073128	A	C	N/A	1	1
g.chr1:24022892A>C	ColoRect-AdenoCA_TCGA	ENSG00000142676	RPL11	chr1:24022883:+	0.493489	0.196171	-1.38435	chr1	24022892	A	C	N/A	1	1
g.chr1:241756930T>G	ColoRect-AdenoCA_TCGA	ENSG00000054277	OPN3	chr1:241756904:-	0.867694	0.474758	-1.98177	chr1	241756930	T	G	N/A	1	1
g.chr1:245286401A>G	Kidney-RCC_TCGA	ENSG00000203666	EFCAB2	chr1:245286438:+	0.279672	0.0441307	-2.12938	chr1	245286401	A	G	N/A	1	1
g.chr1:24863486A>C	ColoRect-AdenoCA_TCGA	ENSG00000117602	RCAN3	chr1:24863506:+	0.734615	0.242526	-2.15704	chr1	24863486	A	C	N/A	1	1
g.chr1:24933982A>C	ColoRect-AdenoCA_TCGA	ENSG00000184454	NCMAP	chr1:24934003:+	0.390435	0.0995408	-1.75685	chr1	24933982	A	C	N/A	1	1
g.chr1:25825914A>C	ColoRect-AdenoCA_TCGA	ENSG00000204178	TMEM57	chr1:25825968:+	0.562793	0.0866624	-2.60759	chr1	25825914	A	C	N/A	1	1
g.chr1:26646993T>C	Liver-HCC_TCGA	ENSG00000169442	CD52	chr1:26647014:+	0.285121	0.0282051	-2.62044	chr1	26646993	T	C	N/A	1	1
g.chr1:27108572T>G	Skin-Melanoma_ICGC	ENSG00000117713	ARID1A	chr1:27108595:+	0.895791	0.56571	-1.88694	chr1	27108572	T	G	tsg	1	1
g.chr1:28527082T>G	ColoRect-AdenoCA_TCGA	ENSG00000126698	DNAJC8	chr1:28527150:-	0.65365	0.0953159	-2.88551	chr1	28527082	T	G	N/A	1	1
g.chr1:28564596A>C	ColoRect-AdenoCA_TCGA	ENSG00000130770	ATPIF1	chr1:28564583:+	0.44972	0.137976	-1.6304	chr1	28564596	A	C	N/A	1	1
g.chr1:32373178T>A	ColoRect-AdenoCA_TCGA	ENSG00000184007	PTP4A2	chr1:32373210:-	0.119869	0.0407491	-1.16505	chr1	32373178	T	A	N/A	1	1
g.chr1:33086444T>G	ColoRect-AdenoCA_TCGA	ENSG00000176261	ZBTB8OS	chr1:33086421:-	0.61589	0.241403	-1.61714	chr1	33086444	T	G	N/A	1	1
g.chr1:35451788T>G	ColoRect-AdenoCA_TCGA	ENSG00000163867	ZMYM6NB	chr1:35451766:-	0.475203	0.137242	-1.73912	chr1	35451788	T	G	N/A	1	1
g.chr1:36560858T>G	ColoRect-AdenoCA_TCGA	ENSG00000171812	COL8A2	chr1:36560842:-	0.255727	0.0274403	-2.49962	chr1	36560858	T	G	N/A	1	1
g.chr1:36802889A>C	ColoRect-AdenoCA_TCGA	ENSG00000214193	STK40	chr1:36802904:+	0.540768	0.0684626	-2.77398	chr1	36802889	A	C	N/A	1	1
g.chr1:38175364A>C	ColoRect-AdenoCA_TCGA	ENSG00000134690	CDCA8	chr1:38175391:+	0.571056	0.101828	-2.46324	chr1	38175364	A	C	N/A	1	1
g.chr1:38275542A>C	ColoRect-AdenoCA_TCGA	ENSG00000197982	MTF1	chr1:38275562:+	0.255421	0.0665314	-1.57132	chr1	38275542	A	C	N/A	1	1
g.chr1:39303886T>C	Skin-Melanoma_TCGA	ENSG00000116954	RRAGC	chr1:39303870:-	0.518812	0.0525163	-2.96797	chr1	39303886	T	C	N/A	1	1
g.chr1:39471538A>G	ColoRect-AdenoCA_TCGA	ENSG00000174574	AKIRIN1	chr1:39471555:+	0.619457	0.22707	-1.71217	chr1	39471538	A	G	N/A	1	1
g.chr1:40759828A>G	Breast-AdenoCa_ICGC	ENSG00000084073	ZMPSTE24	chr1:40759815:+	0.376745	0.0782376	-1.96315	chr1	40759828	A	G	N/A	1	1
g.chr1:40987007A>C	ColoRect-AdenoCA_TCGA	ENSG00000164002	EXO5	chr1:40987028:+	0.307501	0.0639653	-1.87149	chr1	40987007	A	C	N/A	1	1
g.chr1:43245139A>T	Liver-HCC_TCGA	ENSG00000164008	C1orf50	chr1:43245162:+	0.15848	0.05994	-1.08302	chr1	43245139	A	T	N/A	1	1
g.chr1:43266467A>C	Breast-AdenoCa_TCGA	ENSG00000164008	C1orf50	chr1:43266491:+	0.598633	0.259441	-1.44865	chr1	43266467	A	C	N/A	1	1
g.chr1:43836675T>C	ColoRect-AdenoCA_TCGA	ENSG00000159479	ELOVL1	chr1:43836637:-	0.178376	0.0453479	-1.51959	chr1	43836675	T	C	N/A	1	1
g.chr1:43837147T>G	ColoRect-AdenoCA_TCGA	ENSG00000159479	MED8	chr1:43837123:-	0.379686	0.0704719	-2.08858	chr1	43837147	T	G	N/A	1	1
g.chr1:43921513A>G	Liver-HCC_ICGC	ENSG00000198198	HYI	chr1:43921529:+	0.499233	0.0825813	-2.40471	chr1	43921513	A	G	N/A	1	1
g.chr1:44089311A>C	ColoRect-AdenoCA_TCGA	ENSG00000142949	PTPRF	chr1:44089337:+	0.573185	0.187311	-1.76243	chr1	44089311	A	C	N/A	1	1
g.chr1:44682740T>G	ColoRect-AdenoCA_TCGA	ENSG00000117419	DMAP1	chr1:44682710:-	0.439773	0.188924	-1.21493	chr1	44682740	T	G	N/A	1	1
g.chr1:45118936T>G	ColoRect-AdenoCA_TCGA	ENSG00000126106	TMEM53	chr1:45118919:-	0.279303	0.0614181	-1.77874	chr1	45118936	T	G	N/A	1	1
g.chr1:46834359A>C	ColoRect-AdenoCA_TCGA	ENSG00000117481	NSUN4	chr1:46834396:+	0.700001	0.373229	-1.36569	chr1	46834359	A	C	N/A	1	1
g.chr1:46887343A>G	ColoRect-AdenoCA_TCGA	ENSG00000117480	FAAH	chr1:46887358:+	0.227384	0.0291174	-2.28373	chr1	46887343	A	G	N/A	1	1
g.chr1:50883244T>G	ColoRect-AdenoCA_TCGA	ENSG00000142700	DMRTA2	chr1:50883225:-	0.35113	0.151191	-1.11121	chr1	50883244	T	G	N/A	1	1
g.chr1:51820929T>G	ColoRect-AdenoCA_TCGA	ENSG00000085832	EPS15	chr1:51820909:-	0.668473	0.333248	-1.39482	chr1	51820929	T	G	tsg	1	1
g.chr1:52888968T>G	ColoRect-AdenoCA_TCGA	ENSG00000134744	ZCCHC11	chr1:52888953:-	0.639982	0.20188	-1.94988	chr1	52888968	T	G	N/A	1	1
g.chr1:55532052T>A	Breast-AdenoCa_TCGA	ENSG00000162402	USP24	chr1:55532034:-	0.82883	0.54443	-1.39917	chr1	55532052	T	A	N/A	1	1
g.chr1:55533616A>C	ColoRect-AdenoCA_TCGA	ENSG00000169174	USP24	chr1:55533630:+	0.544498	0.262824	-1.20981	chr1	55533616	A	C	N/A	1	1
g.chr1:59041119T>G	ColoRect-AdenoCA_TCGA	ENSG00000184292	TACSTD2	chr1:59041101:-	0.592913	0.334125	-1.0656	chr1	59041119	T	G	N/A	1	1
g.chr1:59246851T>C	Liver-HCC_ICGC	ENSG00000177606	JUN	chr1:59246795:-	0.207655	0.0843412	-1.04565	chr1	59246851	T	C	oncogene	1	1
g.chr1:62699144A>C	Uterus-AdenoCA_TCGA	ENSG00000240563	L1TD1	chr1:62699166:+	0.295983	0.0446561	-2.19658	chr1	62699144	A	C	N/A	1	1
g.chr1:63331167T>A	Liver-HCC_ICGC	ENSG00000125703	ATG4C	chr1:63331187:+	0.409153	0.0770398	-2.1158	chr1	63331167	T	A	N/A	1	1
g.chr1:63903687A>C	Liver-HCC_ICGC	ENSG00000088035	ITGB3BP	chr1:63903708:+	0.626158	0.329261	-1.2273	chr1	63903687	A	C	N/A	1	1
g.chr1:64647285A>T	ColoRect-AdenoCA_TCGA	ENSG00000185483	ROR1	chr1:64647312:+	0.426064	0.0137775	-3.97291	chr1	64647285	A	T	N/A	1	1
g.chr1:67243396A>C	ColoRect-AdenoCA_TCGA	ENSG00000152760	TCTEX1D1	chr1:67243415:+	0.529737	0.222847	-1.36824	chr1	67243396	A	C	N/A	1	1
g.chr1:67464704T>C	Liver-HCC_ICGC	ENSG00000116704	SLC35D1	chr1:67464682:-	0.332449	0.152289	-1.01963	chr1	67464704	T	C	N/A	1	1
g.chr1:68941279T>G	Prost-AdenoCA_ICGC	ENSG00000024526	DEPDC1	chr1:68941199:-	0.686313	0.409754	-1.14792	chr1	68941279	T	G	N/A	1	1
g.chr1:70589148T>G	Bladder-TCC_TCGA	ENSG00000033122	LRRC7	chr1:70589171:+	0.552122	0.12998	-2.11038	chr1	70589148	T	G	N/A	1	1
g.chr1:70907168T>C	ColoRect-AdenoCA_TCGA	ENSG00000116761	CTH	chr1:70907190:+	0.167576	0.0510711	-1.31921	chr1	70907168	T	C	N/A	1	1
g.chr1:75171484T>C	Skin-Melanoma_ICGC	ENSG00000116791	CRYZ	chr1:75171469:-	0.430028	0.141812	-1.51859	chr1	75171484	T	C	N/A	1	1
g.chr1:77100268A>C	ColoRect-AdenoCA_TCGA	ENSG00000184005	ST6GALNAC3	chr1:77100288:+	0.628565	0.230071	-1.73398	chr1	77100268	A	C	N/A	1	1
g.chr1:78028185T>C	Biliary-AdenoCA_ICGC	ENSG00000036549	ZZZ3	chr1:78028101:-	0.883559	0.48571	-2.08375	chr1	78028185	T	C	N/A	1	1
g.chr1:79005420A>C	Eso-AdenoCa_ICGC	ENSG00000122420	PTGFR	chr1:79005434:+	0.480603	0.111596	-1.99691	chr1	79005420	A	C	N/A	1	1
g.chr1:82458085A>G	Lung-SCC_TCGA	ENSG00000117114	LPHN2	chr1:82458107:+	0.750368	0.332659	-1.79676	chr1	82458085	A	G	N/A	1	1
g.chr1:82459107A>C	ColoRect-AdenoCA_TCGA	ENSG00000117114	LPHN2	chr1:82459123:+	0.541372	0.207353	-1.50683	chr1	82459107	A	C	N/A	1	1
g.chr1:84333152T>G	ColoRect-AdenoCA_TCGA	ENSG00000137941	TTLL7	chr1:84333134:-	0.9031	0.526414	-2.1264	chr1	84333152	T	G	N/A	1	1
g.chr1:86814188T>A	Lung-SCC_TCGA	ENSG00000122417	ODF2L	chr1:86814158:-	0.251199	0.0711064	-1.47759	chr1	86814188	T	A	N/A	1	2
g.chr1:86814190T>C	Uterus-AdenoCA_TCGA	ENSG00000122417	ODF2L	chr1:86814158:-	0.251199	0.0629149	-1.60876	chr1	86814190	T	C	N/A	1	2
g.chr1:89301586A>G	Lymph-BNHL_ICGC	ENSG00000065243	PKN2	chr1:89301638:+	0.582133	0.114345	-2.37864	chr1	89301586	A	G	N/A	1	1
g.chr1:89647475T>C	Eso-AdenoCa_ICGC	ENSG00000162654	GBP4	chr1:89647456:-	0.530001	0.2609	-1.16144	chr1	89647475	T	C	N/A	1	1
g.chr1:93603959A>C	Ovary-AdenoCA_ICGC	ENSG00000143033	MTF2	chr1:93604001:+	0.588355	0.171293	-1.93366	chr1	93603959	A	C	N/A	1	1
g.chr1:93617423T>G	ColoRect-AdenoCA_TCGA	ENSG00000117500	TMED5	chr1:93617407:-	0.432628	0.20104	-1.10867	chr1	93617423	T	G	N/A	1	1
g.chr20:14304793T>G	ColoRect-AdenoCA_TCGA	ENSG00000125848	FLRT3	chr20:14304778:-	0.919512	0.459535	-2.59795	chr20	14304793	T	G	N/A	1	1
g.chr20:18546425A>C	ColoRect-AdenoCA_TCGA	ENSG00000101310	LINC00493	chr20:18546444:+	0.759783	0.220301	-2.41541	chr20	18546425	A	C	N/A	1	1
g.chr20:18550184T>A	Bone-Epith_ICGC	ENSG00000232388	LINC00493	chr20:18550176:+	0.926534	0.364903	-3.08877	chr20	18550184	T	A	N/A	1	1
g.chr20:1921151A>G	Liver-HCC_ICGC	ENSG00000198053	SIRPA	chr20:1921170:+	0.518386	0.261975	-1.10931	chr20	1921151	A	G	tsg	1	1
g.chr20:1959422T>C	Liver-HCC_TCGA	ENSG00000101327	PDYN	chr20:1959402:-	0.725438	0.300197	-1.81796	chr20	1959422	T	C	N/A	1	1
g.chr20:20015015A>C	ColoRect-AdenoCA_TCGA	ENSG00000173418	CRNKL1	chr20:20015090:+	0.431655	0.0983806	-1.94025	chr20	20015015	A	C	N/A	1	1
g.chr20:2193784A>C	Ovary-AdenoCA_TCGA	N/A	RP11-128M1.1	chr20:2193797:+	0.270141	0.0322707	-2.40689	chr20	2193784	A	C	N/A	1	1
g.chr20:23355178T>G	ColoRect-AdenoCA_TCGA	ENSG00000125814	NAPB	chr20:23355194:-	0.639783	0.229899	-1.7833	chr20	23355178	T	G	N/A	1	1
g.chr20:33148368T>G	ColoRect-AdenoCA_TCGA	ENSG00000101464	MAP1LC3A	chr20:33148346:-	0.466785	0.10354	-2.02545	chr20	33148368	T	G	N/A	1	1
g.chr20:33301218A>C	ColoRect-AdenoCA_TCGA	ENSG00000078804	TP53INP2	chr20:33301209:+	0.52883	0.203647	-1.47911	chr20	33301218	A	C	N/A	1	1
g.chr20:33873553T>G	ColoRect-AdenoCA_TCGA	ENSG00000125998	FAM83C	chr20:33873534:-	0.44951	0.148641	-1.54265	chr20	33873553	T	G	N/A	1	1
g.chr20:34238085T>A	Biliary-AdenoCA_ICGC	ENSG00000244462	RBM12	chr20:34238063:-	0.456091	0.0337628	-3.17796	chr20	34238085	T	A	N/A	1	1
g.chr20:34288883T>C	Breast-AdenoCa_TCGA	ENSG00000125995	ROMO1	chr20:34288902:+	0.295797	0.0437005	-2.21832	chr20	34288883	T	C	N/A	1	1
g.chr20:34819288A>T	Breast-AdenoCa_TCGA	ENSG00000088367	EPB41L1	chr20:34819303:+	0.387919	0.0430812	-2.64456	chr20	34819288	A	T	N/A	1	1
g.chr20:35280199T>C	Lung-SCC_TCGA	ENSG00000101079	NDRG3	chr20:35280174:-	0.833298	0.395458	-2.03361	chr20	35280199	T	C	N/A	1	1
g.chr20:36120337T>G	ColoRect-AdenoCA_TCGA	ENSG00000166619	BLCAP	chr20:36120320:-	0.687076	0.10969	-2.88039	chr20	36120337	T	G	N/A	1	1
g.chr20:42100305A>T	Uterus-AdenoCA_TCGA	ENSG00000124193	RNU6-1251P	chr20:42100330:+	0.325414	0.0469511	-2.28156	chr20	42100305	A	T	N/A	1	1
g.chr20:43118286A>C	ColoRect-AdenoCA_TCGA	ENSG00000124120	TTPAL	chr20:43118312:+	0.0358281	0.00142068	-3.26266	chr20	43118286	A	C	N/A	1	1
g.chr20:43249933A>C	ColoRect-AdenoCA_TCGA	ENSG00000168734	ADA	chr20:43249950:+	0.0772382	0.0218336	-1.32175	chr20	43249933	A	C	N/A	1	1
g.chr20:44688767A>C	ColoRect-AdenoCA_TCGA	ENSG00000124140	NCOA5	chr20:44688789:+	0.697948	0.0658019	-3.49059	chr20	44688767	A	C	N/A	1	1
g.chr20:4833128T>C	Lung-SCC_TCGA	ENSG00000089057	SLC23A2	chr20:4833106:-	0.242281	0.0588202	-1.63244	chr20	4833128	T	C	N/A	1	1
g.chr20:48570399A>C	ColoRect-AdenoCA_TCGA	ENSG00000124226	RNF114	chr20:48570422:+	0.844854	0.525872	-1.59122	chr20	48570399	A	C	N/A	1	2
g.chr20:48570403A>C	ColoRect-AdenoCA_TCGA	ENSG00000124226	RNF114	chr20:48570422:+	0.844854	0.564461	-1.43551	chr20	48570403	A	C	N/A	1	2
g.chr20:49367834A>C	ColoRect-AdenoCA_TCGA	ENSG00000124171	PARD6B	chr20:49367857:+	0.866013	0.290268	-2.76024	chr20	49367834	A	C	N/A	1	1
g.chr20:49551433T>C	Liver-HCC_ICGC	ENSG00000000419	DPM1	chr20:49551407:-	0.764717	0.357908	-1.76317	chr20	49551433	T	C	N/A	1	1
g.chr20:52835723A>C	ColoRect-AdenoCA_TCGA	ENSG00000101132	PFDN4	chr20:52835817:+	0.656174	0.285337	-1.56443	chr20	52835723	A	C	N/A	1	1
g.chr20:57290874A>G	Panc-AdenoCA_ICGC	ENSG00000215440	NPEPL1	chr20:57290894:+	0.464126	0.125904	-1.79393	chr20	57290874	A	G	N/A	1	1
g.chr20:57831070A>C	ColoRect-AdenoCA_TCGA	ENSG00000124203	ZNF831	chr20:57831091:+	0.412364	0.0770868	-2.1284	chr20	57831070	A	C	N/A	1	1
g.chr20:61472423T>G	Bone-Leiomyo_TCGA	ENSG00000092758	COL9A3	chr20:61472390:+	0.462552	0.224531	-1.08938	chr20	61472423	T	G	N/A	1	1
g.chr20:61473618T>A	Eso-AdenoCa_ICGC	ENSG00000092758	TCFL5	chr20:61473703:+	0.731767	0.176996	-2.54044	chr20	61473618	T	A	N/A	1	1
g.chr20:61600921A>C	ColoRect-AdenoCA_TCGA	ENSG00000101194	SLC17A9	chr20:61600937:+	0.580529	0.0819688	-2.74084	chr20	61600921	A	C	N/A	1	1
g.chr20:62157682T>G	ColoRect-AdenoCA_TCGA	ENSG00000101213	PTK6	chr20:62157658:-	0.622067	0.36276	-1.06174	chr20	62157682	T	G	both	1	1
g.chr20:62188003T>C	Liver-HCC_ICGC	ENSG00000125531	C20orf195	chr20:62188022:+	0.343599	0.121312	-1.33277	chr20	62188003	T	C	N/A	1	1
g.chr20:62375896T>G	ColoRect-AdenoCA_TCGA	ENSG00000130584	ZBTB46	chr20:62375873:-	0.625107	0.324733	-1.24339	chr20	62375896	T	G	N/A	1	1
g.chr20:627287A>T	Breast-AdenoCa_TCGA	ENSG00000271303	SRXN1	chr20:627293:-	0.850566	0.137641	-3.57407	chr20	627287	A	T	N/A	1	1
g.chr20:7961656T>G	ColoRect-AdenoCA_TCGA	ENSG00000125827	TMX4	chr20:7961630:-	0.282403	0.0949208	-1.32241	chr20	7961656	T	G	N/A	1	1
g.chr21:18966212A>C	ColoRect-AdenoCA_TCGA	ENSG00000154639	BTG3	chr21:18966228:+	0.440433	0.18445	-1.24708	chr21	18966212	A	C	N/A	1	1
g.chr21:28290692T>C	Biliary-AdenoCA_ICGC	ENSG00000154736	ADAMTS5	chr21:28290673:-	0.266112	0.102686	-1.15329	chr21	28290692	T	C	N/A	1	1
g.chr21:34874134T>G	Panc-AdenoCA_ICGC	ENSG00000159131	GART	chr21:34874119:-	0.161265	0.0189883	-2.29591	chr21	34874134	T	G	N/A	1	2
g.chr21:34874136T>C	Ovary-AdenoCA_TCGA	ENSG00000159131	GART	chr21:34874119:-	0.161265	0.0210032	-2.19301	chr21	34874136	T	C	N/A	1	2
g.chr21:43305244T>G	Lymph-BNHL_ICGC	ENSG00000157617	C2CD2	chr21:43305221:-	0.589144	0.0927715	-2.64068	chr21	43305244	T	G	N/A	1	1
g.chr22:18062942A>C	Ovary-AdenoCA_TCGA	N/A	SLC25A18	chr22:18062923:-	0.284205	0.101645	-1.25538	chr22	18062942	A	C	N/A	1	1
g.chr22:18588149A>C	ColoRect-AdenoCA_TCGA	ENSG00000215193	PEX26	chr22:18588200:+	0.614053	0.252466	-1.54988	chr22	18588149	A	C	N/A	1	1
g.chr22:20114575A>C	ColoRect-AdenoCA_TCGA	ENSG00000099901	RANBP1	chr22:20114589:+	0.184196	0.0332226	-1.88256	chr22	20114575	A	C	N/A	1	1
g.chr22:21246248A>T	Breast-AdenoCa_ICGC	ENSG00000099940	SNAP29	chr22:21246276:+	0.209115	0.0716382	-1.23153	chr22	21246248	A	T	N/A	1	1
g.chr22:21416169A>C	ColoRect-AdenoCA_TCGA	ENSG00000187905	AC002472.13	chr22:21416186:+	0.339627	0.0782157	-1.80188	chr22	21416169	A	C	N/A	1	1
g.chr22:24968082A>C	ColoRect-AdenoCA_TCGA	ENSG00000100028	SNRPD3	chr22:24968102:+	0.205798	0.0353534	-1.95593	chr22	24968082	A	C	N/A	1	1
g.chr22:24968571A>G	Kidney-RCC_ICGC	ENSG00000100028	SNRPD3	chr22:24968588:+	0.0961151	0.0294423	-1.25428	chr22	24968571	A	G	N/A	1	1
g.chr22:25603299A>G	ColoRect-AdenoCA_TCGA	ENSG00000100053	CRYBB3	chr22:25603326:+	0.263051	0.0264279	-2.57638	chr22	25603299	A	G	N/A	1	1
g.chr22:29708939T>G	ColoRect-AdenoCA_TCGA	ENSG00000100276	RASL10A	chr22:29708922:-	0.147203	0.0375171	-1.48801	chr22	29708939	T	G	N/A	1	1
g.chr22:30184619T>G	ColoRect-AdenoCA_TCGA	ENSG00000100325	ASCC2	chr22:30184600:-	0.782537	0.232694	-2.47368	chr22	30184619	T	G	N/A	1	1
g.chr22:30821521T>G	Skin-Melanoma_TCGA	ENSG00000100003	MTFP1	chr22:30821538:+	0.154966	0.0272014	-1.88074	chr22	30821521	T	G	N/A	1	1
g.chr22:30825024A>G	Stomach-AdenoCA_TCGA	ENSG00000242114	MTFP1	chr22:30824969:+	0.0841229	0.0167696	-1.68368	chr22	30825024	A	G	N/A	1	1
g.chr22:36675735T>A	Lung-AdenoCA_TCGA	ENSG00000100345	MYH9	chr22:36675716:-	0.140217	0.0322551	-1.5878	chr22	36675735	T	A	tsg	1	1
g.chr22:39129568A>C	Liver-HCC_ICGC	ENSG00000100226	GTPBP1	chr22:39129582:+	0.207465	0.0399591	-1.83885	chr22	39129568	A	C	N/A	1	1
g.chr22:39139103A>C	ColoRect-AdenoCA_TCGA	ENSG00000100226	SUN2	chr22:39139120:+	0.298463	0.0685254	-1.75494	chr22	39139103	A	C	N/A	1	1
g.chr22:39257488T>A	ColoRect-AdenoCA_TCGA	ENSG00000183741	CBX6	chr22:39257468:-	0.351264	0.0554813	-2.22114	chr22	39257488	T	A	N/A	1	1
g.chr22:39912361A>T	Eso-AdenoCa_ICGC	ENSG00000100335	MIEF1	chr22:39912307:+	0.149414	0.0210187	-2.10189	chr22	39912361	A	T	N/A	1	1
g.chr22:40085716A>G	Liver-HCC_ICGC	ENSG00000100346	CACNA1I	chr22:40085740:+	0.811239	0.261628	-2.4956	chr22	40085716	A	G	N/A	1	1
g.chr22:40723344A>G	Liver-HCC_ICGC	ENSG00000100354	TNRC6B	chr22:40723367:+	0.216097	0.0256524	-2.34857	chr22	40723344	A	G	N/A	1	1
g.chr22:41576064A>T	Breast-AdenoCa_TCGA	ENSG00000100393	EP300	chr22:41576107:+	0.481622	0.225521	-1.16023	chr22	41576064	A	T	tsg	1	1
g.chr22:41639500T>C	Prost-AdenoCA_ICGC	ENSG00000100401	CHADL	chr22:41639476:-	0.626172	0.0775481	-2.99197	chr22	41639500	T	C	N/A	1	1
g.chr22:42481556T>A	Kidney-ChRCC_TCGA	ENSG00000184983	NDUFA6	chr22:42481530:-	0.535691	0.0329445	-3.52244	chr22	42481556	T	A	N/A	1	1
g.chr22:45738250A>G	ColoRect-AdenoCA_TCGA	ENSG00000100376	FAM118A	chr22:45738272:+	0.596415	0.0268582	-3.98051	chr22	45738250	A	G	N/A	1	1
g.chr22:50281926A>T	Skin-Melanoma_ICGC	ENSG00000100426	ZBED4	chr22:50281962:+	0.189992	0.0474912	-1.54849	chr22	50281926	A	T	N/A	1	1
g.chr22:51052389A>C	Prost-AdenoCA_ICGC	ENSG00000008735	MAPK8IP2	chr22:51052406:+	0.418229	0.0459613	-2.70286	chr22	51052389	A	C	N/A	1	1
g.chr2:10142383A>C	Panc-AdenoCA_ICGC	ENSG00000134317	GRHL1	chr2:10142397:+	0.656594	0.237414	-1.81506	chr2	10142383	A	C	N/A	1	1
g.chr2:101612491A>G	ColoRect-AdenoCA_TCGA	ENSG00000170485	NPAS2	chr2:101612517:+	0.601909	0.160829	-2.0655	chr2	101612491	A	G	N/A	1	1
g.chr2:102511863A>G	Ovary-AdenoCA_ICGC	ENSG00000071054	MAP4K4	chr2:102511894:+	0.373865	0.0682757	-2.09781	chr2	102511863	A	G	N/A	1	1
g.chr2:102796312A>C	ColoRect-AdenoCA_TCGA	ENSG00000115594	IL1R1	chr2:102796334:+	0.765451	0.368472	-1.72158	chr2	102796312	A	C	N/A	1	1
g.chr2:10923534T>A	Liver-HCC_ICGC	ENSG00000143870	PDIA6	chr2:10923491:-	0.59897	0.0987274	-2.61262	chr2	10923534	T	A	N/A	1	1
g.chr2:112945887A>C	ColoRect-AdenoCA_TCGA	ENSG00000144152	FBLN7	chr2:112945905:+	0.215221	0.0416123	-1.84312	chr2	112945887	A	C	N/A	1	1
g.chr2:113097542A>C	ColoRect-AdenoCA_TCGA	ENSG00000188177	ZC3H6	chr2:113097557:+	0.69956	0.2253	-2.08025	chr2	113097542	A	C	N/A	2	2
g.chr2:113097542A>C	ColoRect-AdenoCA_TCGA	ENSG00000188177	ZC3H6	chr2:113097557:+	0.69956	0.2253	-2.08025	chr2	113097542	A	C	N/A	2	2
g.chr2:113820996A>T	Skin-Melanoma_ICGC	ENSG00000136695	IL36RN	chr2:113821035:+	0.258102	0.102511	-1.11377	chr2	113820996	A	T	N/A	1	1
g.chr2:114717755A>C	ColoRect-AdenoCA_TCGA	ENSG00000115091	ACTR3	chr2:114717775:+	0.408075	0.0999642	-1.82569	chr2	114717755	A	C	N/A	1	1
g.chr2:11968298A>C	ColoRect-AdenoCA_TCGA	ENSG00000134324	LPIN1	chr2:11968314:+	0.303166	0.0790696	-1.62279	chr2	11968298	A	C	N/A	1	1
g.chr2:120740234A>G	ColoRect-AdenoCA_TCGA	ENSG00000088179	PTPN4	chr2:120740292:+	0.0871646	0.0265617	-1.25261	chr2	120740234	A	G	N/A	1	1
g.chr2:120975071T>G	ColoRect-AdenoCA_TCGA	ENSG00000226479	AC012363.4	chr2:120974984:-	0.410662	0.0842844	-2.02428	chr2	120975071	T	G	N/A	1	1
g.chr2:122523685A>C	Kidney-RCC_TCGA	ENSG00000211460	TSN	chr2:122523700:+	0.260687	0.0301977	-2.42692	chr2	122523685	A	C	N/A	1	1
g.chr2:122525399A>G	Skin-Melanoma_ICGC	ENSG00000211460	TSN	chr2:122525424:+	0.454904	0.154735	-1.51706	chr2	122525399	A	G	N/A	1	1
g.chr2:133394669T>G	ColoRect-AdenoCA_TCGA	ENSG00000150551	GPR39	chr2:133394646:-	0.672258	0.210751	-2.03882	chr2	133394669	T	G	N/A	1	1
g.chr2:133401401T>C	Liver-HCC_ICGC	ENSG00000150551	GPR39	chr2:133401386:-	0.184815	0.0739439	-1.04357	chr2	133401401	T	C	N/A	1	1
g.chr2:136663468T>C	Stomach-AdenoCA_ICGC	ENSG00000115866	DARS	chr2:136663451:-	0.761325	0.229156	-2.37304	chr2	136663468	T	C	N/A	1	2
g.chr2:136663470T>C	Liver-HCC_ICGC	ENSG00000115866	DARS	chr2:136663451:-	0.761325	0.343061	-1.80964	chr2	136663470	T	C	N/A	1	2
g.chr2:138772823A>C	ColoRect-AdenoCA_TCGA	ENSG00000150540	HNMT	chr2:138772845:+	0.590832	0.321766	-1.11308	chr2	138772823	A	C	N/A	1	1
g.chr2:139327738A>C	ColoRect-AdenoCA_TCGA	ENSG00000144228	SPOPL	chr2:139327757:+	0.212805	0.0896874	-1.00936	chr2	139327738	A	C	N/A	1	1
g.chr2:140990485T>C	Liver-HCC_ICGC	ENSG00000168702	LRP1B	chr2:140990457:-	0.33324	0.0421998	-2.42866	chr2	140990485	T	C	tsg	1	2
g.chr2:140990487A>G	Skin-Melanoma_ICGC	ENSG00000168702	LRP1B	chr2:140990457:-	0.33324	0.127433	-1.23028	chr2	140990487	A	G	tsg	1	2
g.chr2:144525907A>C	ColoRect-AdenoCA_TCGA	ENSG00000075884	ARHGAP15	chr2:144525921:+	0.681914	0.20001	-2.14881	chr2	144525907	A	C	N/A	1	1
g.chr2:144701575A>G	ColoRect-AdenoCA_TCGA	ENSG00000121964	GTDC1	chr2:144701550:-	0.781503	0.160476	-2.92914	chr2	144701575	A	G	N/A	1	1
g.chr2:149545495T>C	Stomach-AdenoCA_TCGA	ENSG00000135999	EPC2	chr2:149545514:+	0.522101	0.282822	-1.01897	chr2	149545495	T	C	N/A	1	1
g.chr2:149882593A>G	Lung-AdenoCA_TCGA	ENSG00000168280	KIF5C	chr2:149882612:+	0.839828	0.362789	-2.22023	chr2	149882593	A	G	N/A	1	1
g.chr2:152103767T>A	Head-SCC_TCGA	ENSG00000184898	RBM43	chr2:152103749:-	0.707258	0.47007	-1.00197	chr2	152103767	T	A	N/A	1	1
g.chr2:152658922T>G	ColoRect-AdenoCA_TCGA	ENSG00000162980	ARL5A	chr2:152658906:-	0.40241	0.0967347	-1.83861	chr2	152658922	T	G	N/A	1	1
g.chr2:153503935T>G	Lymph-BNHL_ICGC	ENSG00000196504	FMNL2	chr2:153503911:-	0.649888	0.404104	-1.00694	chr2	153503935	T	G	N/A	1	1
g.chr2:155312270A>C	ColoRect-AdenoCA_TCGA	ENSG00000144278	GALNT13	chr2:155312283:+	0.42955	0.157008	-1.39697	chr2	155312270	A	C	N/A	1	1
g.chr2:158269321A>T	Skin-Melanoma_TCGA	ENSG00000115165	CYTIP	chr2:158269297:-	0.918164	0.218676	-3.69105	chr2	158269321	A	T	N/A	1	1
g.chr2:162840925A>C	ColoRect-AdenoCA_TCGA	ENSG00000144290	SLC4A10	chr2:162840940:+	0.309228	0.101944	-1.37208	chr2	162840925	A	C	N/A	1	1
g.chr2:165752711T>C	Uterus-AdenoCA_TCGA	ENSG00000169507	SLC38A11	chr2:165752694:-	0.245764	0.0801333	-1.3192	chr2	165752711	T	C	N/A	1	1
g.chr2:166846656T>C	Uterus-AdenoCA_TCGA	ENSG00000144285	SCN1A	chr2:166846637:-	0.397197	0.0826461	-1.98977	chr2	166846656	T	C	N/A	1	1
g.chr2:170608373A>C	ColoRect-AdenoCA_TCGA	N/A	KLHL23	chr2:170608388:+	0.844503	0.629482	-1.16213	chr2	170608373	A	C	N/A	1	1
g.chr2:172851047A>G	Kidney-RCC_ICGC	ENSG00000128708	HAT1	chr2:172851067:+	0.795099	0.328633	-2.07031	chr2	172851047	A	G	N/A	1	1
g.chr2:173493019A>C	ColoRect-AdenoCA_TCGA	ENSG00000152256	PDK1	chr2:173493040:+	0.426159	0.10733	-1.82077	chr2	173493019	A	C	N/A	1	1
g.chr2:174133631A>C	ColoRect-AdenoCA_TCGA	ENSG00000091436	MLTK	chr2:174133650:+	0.538471	0.147631	-1.90749	chr2	174133631	A	C	N/A	1	1
g.chr2:174773285T>A	Lymph-BNHL_ICGC	ENSG00000172845	SP3	chr2:174773258:-	0.795178	0.469102	-1.48017	chr2	174773285	T	A	N/A	1	1
g.chr2:175664126T>C	Stomach-AdenoCA_ICGC	ENSG00000128656	CHN1	chr2:175664081:-	0.805032	0.490317	-1.45678	chr2	175664126	T	C	N/A	1	1
g.chr2:176042891T>G	Ovary-AdenoCA_ICGC	ENSG00000154518	ATP5G3	chr2:176042872:-	0.515007	0.0561632	-2.88174	chr2	176042891	T	G	N/A	1	1
g.chr2:176980381A>G	Lung-SCC_TCGA	ENSG00000128713	HOXD10	chr2:176980407:+	0.453633	0.183992	-1.30353	chr2	176980381	A	G	oncogene	1	1
g.chr2:177039191A>C	ColoRect-AdenoCA_TCGA	ENSG00000128652	HOXD3	chr2:177039211:+	0.257613	0.0777342	-1.41513	chr2	177039191	A	C	N/A	1	1
g.chr2:178084061T>G	ColoRect-AdenoCA_TCGA	ENSG00000116044	HNRNPA3	chr2:178084048:-	0.673142	0.329358	-1.43352	chr2	178084061	T	G	both	1	1
g.chr2:179296178T>G	ColoRect-AdenoCA_TCGA	ENSG00000180228	PRKRA	chr2:179296119:-	0.640925	0.314593	-1.35812	chr2	179296178	T	G	N/A	1	1
g.chr2:1794769T>G	Liver-HCC_ICGC	ENSG00000186487	MYT1L	chr2:1794748:-	0.22993	0.0253944	-2.4388	chr2	1794769	T	G	N/A	1	1
g.chr2:180808992T>G	ColoRect-AdenoCA_TCGA	ENSG00000163510	CWC22	chr2:180808977:-	0.327262	0.114547	-1.32452	chr2	180808992	T	G	N/A	1	1
g.chr2:18114205A>C	ColoRect-AdenoCA_TCGA	ENSG00000170745	KCNS3	chr2:18114225:+	0.524108	0.127873	-2.01641	chr2	18114205	A	C	N/A	1	1
g.chr2:182404000A>G	Liver-HCC_ICGC	ENSG00000115232	CERKL	chr2:182404017:+	0.446582	0.169194	-1.37686	chr2	182404000	A	G	N/A	1	1
g.chr2:187630669A>C	ColoRect-AdenoCA_TCGA	ENSG00000144369	FAM171B	chr2:187630686:+	0.911299	0.772745	-1.10572	chr2	187630669	A	C	N/A	1	1
g.chr2:188209150T>A	Skin-Melanoma_ICGC	ENSG00000064989	CALCRL	chr2:188209136:-	0.397244	0.178279	-1.11109	chr2	188209150	T	A	N/A	1	1
g.chr2:188331559T>C	Liver-HCC_ICGC	ENSG00000003436	TFPI	chr2:188331497:-	0.223568	0.0212092	-2.58689	chr2	188331559	T	C	N/A	1	1
g.chr2:190611690T>G	Liver-HCC_ICGC	ENSG00000128694	ANKAR	chr2:190611677:-	0.579577	0.259376	-1.37026	chr2	190611690	T	G	N/A	1	1
g.chr2:191064920T>C	Bladder-TCC_TCGA	ENSG00000187699	C2orf88	chr2:191064940:+	0.152979	0.0266289	-1.88734	chr2	191064920	T	C	N/A	1	1
g.chr2:19551266A>G	Uterus-AdenoCA_TCGA	ENSG00000143867	OSR1	chr2:19551246:-	0.556305	0.171206	-1.80329	chr2	19551266	A	G	N/A	1	1
g.chr2:197697745T>G	ColoRect-AdenoCA_TCGA	ENSG00000197121	PGAP1	chr2:197697728:-	0.883458	0.264584	-3.04787	chr2	197697745	T	G	N/A	1	1
g.chr2:198340085A>G	Prost-AdenoCA_ICGC	ENSG00000115520	COQ10B	chr2:198340107:+	0.213084	0.0771986	-1.1746	chr2	198340085	A	G	N/A	1	1
g.chr2:198435540T>G	Uterus-AdenoCA_TCGA	ENSG00000162944	RFTN2	chr2:198435527:-	0.698064	0.224036	-2.0804	chr2	198435540	T	G	N/A	1	1
g.chr2:198435686T>C	ColoRect-AdenoCA_TCGA	ENSG00000162944	RFTN2	chr2:198435662:-	0.602766	0.175385	-1.96493	chr2	198435686	T	C	N/A	1	1
g.chr2:199011854A>C	Lymph-BNHL_ICGC	ENSG00000115896	PLCL1	chr2:199011882:+	0.184864	0.0403505	-1.68523	chr2	199011854	A	C	N/A	1	1
g.chr2:199014569A>C	Lymph-BNHL_ICGC	ENSG00000115896	PLCL1	chr2:199014621:+	0.638925	0.278643	-1.52191	chr2	199014569	A	C	N/A	1	1
g.chr2:200835930A>T	Kidney-RCC_ICGC	ENSG00000162972	NA	chr2:200835956:+	0.390679	0.0133939	-3.85501	chr2	200835930	A	T	N/A	1	1
g.chr2:201448385A>C	ColoRect-AdenoCA_TCGA	ENSG00000163535	SGOL2	chr2:201448412:+	0.703652	0.389413	-1.31453	chr2	201448385	A	C	N/A	1	2
g.chr2:201448386A>G	Panc-AdenoCA_ICGC	ENSG00000163535	SGOL2	chr2:201448412:+	0.703652	0.37653	-1.36905	chr2	201448386	A	G	N/A	1	2
g.chr2:201692024A>G	Liver-HCC_TCGA	ENSG00000082153	RP11-469M7.1	chr2:201692061:+	0.217027	0.0815263	-1.13871	chr2	201692024	A	G	N/A	1	1
g.chr2:202345550A>G	Liver-HCC_ICGC	ENSG00000082146	STRADB	chr2:202345569:+	0.808809	0.463039	-1.5904	chr2	202345550	A	G	N/A	1	1
g.chr2:203430321A>C	ColoRect-AdenoCA_TCGA	ENSG00000204217	BMPR2	chr2:203430334:+	0.774742	0.190464	-2.68229	chr2	203430321	A	C	N/A	1	1
g.chr2:203739782T>G	ColoRect-AdenoCA_TCGA	ENSG00000138442	WDR12	chr2:203739765:-	0.149176	0.0476027	-1.25501	chr2	203739782	T	G	N/A	1	1
g.chr2:203852559T>C	Liver-HCC_ICGC	ENSG00000138380	CARF	chr2:203852580:+	0.462767	0.107175	-1.97072	chr2	203852559	T	C	N/A	1	1
g.chr2:204084200A>G	Lung-SCC_TCGA	ENSG00000144426	NBEAL1	chr2:204084226:+	0.42482	0.187241	-1.16502	chr2	204084200	A	G	N/A	1	2
g.chr2:204084202A>G	Liver-HCC_ICGC	ENSG00000144426	NBEAL1	chr2:204084226:+	0.42482	0.164405	-1.3228	chr2	204084202	A	G	N/A	1	2
g.chr2:204295206T>C	Liver-HCC_ICGC	ENSG00000173166	ABI2	chr2:204295182:-	0.87491	0.302342	-2.78126	chr2	204295206	T	C	N/A	1	1
g.chr2:206988297T>C	Lung-AdenoCA_TCGA	ENSG00000023228	NDUFS1	chr2:206988265:-	0.0369523	0.00855258	-1.49246	chr2	206988297	T	C	N/A	1	1
g.chr2:207027723A>C	ColoRect-AdenoCA_TCGA	ENSG00000114942	EEF1B2	chr2:207027743:+	0.178284	0.0662839	-1.11721	chr2	207027723	A	C	N/A	1	1
g.chr2:207943205T>C	CNS-GBM_TCGA	ENSG00000118263	KLF7	chr2:207943188:-	0.279988	0.0920041	-1.34488	chr2	207943205	T	C	N/A	1	1
g.chr2:208613383T>G	ColoRect-AdenoCA_TCGA	ENSG00000163251	CCNYL1	chr2:208613361:-	0.362674	0.0902281	-1.74708	chr2	208613383	T	G	N/A	1	1
g.chr2:21224328T>C	Bone-Leiomyo_TCGA	ENSG00000084674	APOB	chr2:21224301:-	0.532587	0.0870569	-2.48065	chr2	21224328	T	C	N/A	1	1
g.chr2:220048427A>G	Eso-AdenoCa_ICGC	ENSG00000144567	FAM134A	chr2:220048475:+	0.269301	0.0839279	-1.39196	chr2	220048427	A	G	N/A	1	1
g.chr2:220115044A>C	ColoRect-AdenoCA_TCGA	ENSG00000115661	STK16	chr2:220115059:+	0.240599	0.0266473	-2.44866	chr2	220115044	A	C	N/A	1	1
g.chr2:220151600T>G	Skin-Melanoma_ICGC	ENSG00000135924	DNAJB2	chr2:220151617:+	0.850894	0.128253	-3.65813	chr2	220151600	T	G	N/A	1	1
g.chr2:220415466T>C	ColoRect-AdenoCA_TCGA	ENSG00000124006	OBSL1	chr2:220415450:-	0.271346	0.0125028	-3.38142	chr2	220415466	T	C	N/A	1	1
g.chr2:223436480T>G	ColoRect-AdenoCA_TCGA	ENSG00000116120	FARSB	chr2:223436464:-	0.295614	0.0312076	-2.56712	chr2	223436480	T	G	N/A	1	1
g.chr2:224461746T>G	ColoRect-AdenoCA_TCGA	ENSG00000171951	SCG2	chr2:224461658:-	0.680047	0.36908	-1.29015	chr2	224461746	T	G	N/A	1	1
g.chr2:224614778T>C	Liver-HCC_ICGC	ENSG00000152056	AP1S3	chr2:224614759:-	0.16713	0.0597393	-1.15006	chr2	224614778	T	C	N/A	1	1
g.chr2:224618435T>C	Ovary-AdenoCA_ICGC	ENSG00000152056	AP1S3	chr2:224618421:-	0.502591	0.0578523	-2.80063	chr2	224618435	T	C	N/A	1	1
g.chr2:227600536T>A	Lymph-BNHL_ICGC	ENSG00000169047	IRS1	chr2:227600519:-	0.529762	0.144007	-1.90159	chr2	227600536	T	A	N/A	1	1
g.chr2:228420617A>G	Liver-HCC_ICGC	ENSG00000173744	AGFG1	chr2:228420641:+	0.412311	0.0568268	-2.45482	chr2	228420617	A	G	N/A	1	1
g.chr2:234741961T>C	Ovary-AdenoCA_TCGA	ENSG00000123485	MROH2A	chr2:234741937:-	0.1522	0.0318211	-1.69784	chr2	234741961	T	C	N/A	1	1
g.chr2:23970888T>G	ColoRect-AdenoCA_TCGA	ENSG00000119778	ATAD2B	chr2:23970871:-	0.6365	0.114349	-2.60727	chr2	23970888	T	G	N/A	1	1
g.chr2:242037244A>C	Liver-HCC_TCGA	ENSG00000162804	MTERFD2	chr2:242037270:+	0.337344	0.0558029	-2.15336	chr2	242037244	A	C	N/A	1	2
g.chr2:242037247A>C	ColoRect-AdenoCA_TCGA	ENSG00000162804	MTERFD2	chr2:242037270:+	0.337344	0.0817508	-1.74364	chr2	242037247	A	C	N/A	1	2
g.chr2:242179706A>G	Skin-Melanoma_ICGC	ENSG00000146205	HDLBP	chr2:242179721:+	0.218152	0.0473966	-1.72418	chr2	242179706	A	G	N/A	1	1
g.chr2:24286531A>G	Stomach-AdenoCA_TCGA	ENSG00000119782	FKBP1B	chr2:24286551:+	0.80573	0.251407	-2.51362	chr2	24286531	A	G	N/A	1	1
g.chr2:25451336T>C	Prost-AdenoCA_ICGC	ENSG00000119772	RP11-458N5.1	chr2:25451316:-	0.326691	0.0667584	-1.9144	chr2	25451336	T	C	tsg	1	1
g.chr2:27023913A>C	ColoRect-AdenoCA_TCGA	ENSG00000115163	CENPA	chr2:27023935:+	0.881008	0.688888	-1.20708	chr2	27023913	A	C	N/A	1	1
g.chr2:277491A>G	ColoRect-AdenoCA_TCGA	ENSG00000143727	ACP1	chr2:277506:+	0.721543	0.135339	-2.80668	chr2	277491	A	G	N/A	1	1
g.chr2:28002693A>C	ColoRect-AdenoCA_TCGA	ENSG00000243147	RBKS	chr2:28002718:+	0.460293	0.112574	-1.90555	chr2	28002693	A	C	N/A	1	1
g.chr2:29024493A>C	ColoRect-AdenoCA_TCGA	ENSG00000213639	PPP1CB	chr2:29024519:+	0.726958	0.355443	-1.57444	chr2	29024493	A	C	N/A	1	1
g.chr2:29169841A>C	ColoRect-AdenoCA_TCGA	ENSG00000163811	WDR43	chr2:29169920:+	0.350263	0.157253	-1.06093	chr2	29169841	A	C	N/A	1	1
g.chr2:30863740A>G	ColoRect-AdenoCA_TCGA	ENSG00000172954	LCLAT1	chr2:30863768:+	0.296942	0.103343	-1.29871	chr2	30863740	A	G	N/A	1	1
g.chr2:32092911T>G	ColoRect-AdenoCA_TCGA	ENSG00000162959	MEMO1	chr2:32092878:-	0.433797	0.104378	-1.88312	chr2	32092911	T	G	N/A	1	1
g.chr2:32449425A>G	Liver-HCC_ICGC	ENSG00000152683	SLC30A6	chr2:32449448:+	0.425862	0.0316126	-3.12332	chr2	32449425	A	G	N/A	1	1
g.chr2:32456012A>G	Stomach-AdenoCA_TCGA	ENSG00000152683	NLRC4	chr2:32456035:+	0.671259	0.201172	-2.09287	chr2	32456012	A	G	N/A	1	1
g.chr2:33624407A>C	ColoRect-AdenoCA_TCGA	ENSG00000049323	LTBP1	chr2:33624430:+	0.421947	0.134149	-1.54998	chr2	33624407	A	C	N/A	1	1
g.chr2:33624549A>C	ColoRect-AdenoCA_TCGA	ENSG00000049323	LTBP1	chr2:33624576:+	0.551451	0.105913	-2.33972	chr2	33624549	A	C	N/A	1	1
g.chr2:38770010A>C	ColoRect-AdenoCA_TCGA	ENSG00000143889	NA	chr2:38769990:-	0.511039	0.0236295	-3.76551	chr2	38770010	A	C	N/A	1	1
g.chr2:45615836T>G	Liver-HCC_ICGC	ENSG00000068784	SRBD1	chr2:45615819:-	0.39888	0.125442	-1.53174	chr2	45615836	T	G	N/A	1	1
g.chr2:48607710T>A	Ovary-AdenoCA_TCGA	ENSG00000170802	FOXN2	chr2:48607727:+	0.253086	0.0741148	-1.44292	chr2	48607710	T	A	N/A	1	1
g.chr2:48824396A>G	ColoRect-AdenoCA_TCGA	ENSG00000243244	STON1	chr2:48824411:+	0.264877	0.0553265	-1.81682	chr2	48824396	A	G	N/A	1	1
g.chr2:50146816T>C	ColoRect-AdenoCA_TCGA	ENSG00000179915	NRXN1	chr2:50146801:-	0.399295	0.136995	-1.43207	chr2	50146816	T	C	N/A	1	1
g.chr2:54087840A>C	Breast-AdenoCa_TCGA	ENSG00000068878	GPR75	chr2:54087821:-	0.726545	0.139085	-2.80007	chr2	54087840	A	C	N/A	1	1
g.chr2:61289639A>C	Uterus-AdenoCA_TCGA	ENSG00000162928	PEX13	chr2:61289656:+	0.876001	0.680129	-1.20073	chr2	61289639	A	C	N/A	1	1
g.chr2:62382530A>T	Skin-Melanoma_ICGC	ENSG00000173163	COMMD1	chr2:62382543:+	0.458901	0.0848949	-2.21286	chr2	62382530	A	T	N/A	1	1
g.chr2:68404002A>G	Liver-HCC_ICGC	ENSG00000115946	PPP3R1	chr2:68404030:+	0.24342	0.0718701	-1.42429	chr2	68404002	A	G	N/A	1	1
g.chr2:69476445A>C	ColoRect-AdenoCA_TCGA	ENSG00000169604	ANTXR1	chr2:69476459:+	0.893114	0.568933	-1.84546	chr2	69476445	A	C	N/A	1	1
g.chr2:69542365T>G	ColoRect-AdenoCA_TCGA	ENSG00000198380	GFPT1	chr2:69542347:-	0.832219	0.305324	-2.42351	chr2	69542365	T	G	N/A	1	1
g.chr2:69670200T>C	Cervix-SCC_TCGA	ENSG00000115977	AAK1	chr2:69670178:-	0.240514	0.0299108	-2.32931	chr2	69670200	T	C	N/A	1	1
g.chr2:70674697T>C	Prost-AdenoCA_ICGC	ENSG00000163235	TGFA	chr2:70674673:-	0.307426	0.0807952	-1.61941	chr2	70674697	T	C	N/A	1	1
g.chr2:72393849T>G	ColoRect-AdenoCA_TCGA	ENSG00000144036	EXOC6B	chr2:72393823:-	0.275242	0.0753971	-1.53841	chr2	72393849	T	G	N/A	1	1
g.chr2:73989358T>G	ColoRect-AdenoCA_TCGA	ENSG00000144048	DUSP11	chr2:73989311:-	0.195523	0.042344	-1.70415	chr2	73989358	T	G	N/A	1	1
g.chr2:74146762T>C	Lung-AdenoCA_TCGA	ENSG00000163017	ACTG2	chr2:74146780:+	0.589782	0.123727	-2.32067	chr2	74146762	T	C	N/A	1	1
g.chr2:74335276A>C	Uterus-AdenoCA_TCGA	ENSG00000187605	TET3	chr2:74335303:+	0.877909	0.309055	-2.77731	chr2	74335276	A	C	N/A	1	1
g.chr2:74380681T>G	ColoRect-AdenoCA_TCGA	ENSG00000114978	MOB1A	chr2:74380666:-	0.851437	0.0566374	-4.5587	chr2	74380681	T	G	N/A	1	1
g.chr2:74653025T>G	Liver-HCC_ICGC	ENSG00000114993	WDR54	chr2:74652946:-	0.166454	0.0179417	-2.39156	chr2	74653025	T	G	N/A	1	1
g.chr2:75120459A>C	ColoRect-AdenoCA_TCGA	ENSG00000159399	HK2	chr2:75120486:+	0.783407	0.341506	-1.94223	chr2	75120459	A	C	N/A	1	1
g.chr2:75884964A>C	ColoRect-AdenoCA_TCGA	ENSG00000115364	MRPL19	chr2:75884980:+	0.544741	0.295396	-1.04876	chr2	75884964	A	C	N/A	1	1
g.chr2:75886462A>G	Liver-HCC_ICGC	ENSG00000115364	MRPL19	chr2:75886480:+	0.829797	0.446298	-1.79983	chr2	75886462	A	G	N/A	1	1
g.chr2:85569243T>G	ColoRect-AdenoCA_TCGA	ENSG00000042445	RETSAT	chr2:85569220:-	0.765643	0.355434	-1.77911	chr2	85569243	T	G	N/A	1	1
g.chr2:8862326T>G	Prost-AdenoCA_ICGC	ENSG00000134313	RP11-434B12.1	chr2:8862313:-	0.565018	0.12113	-2.24333	chr2	8862326	T	G	N/A	1	1
g.chr2:89156697T>C	Lymph-BNHL_ICGC	ENSG00000211592	IGKC	chr2:89156679:-	0.917455	0.446643	-2.62251	chr2	89156697	T	C	N/A	1	1
g.chr2:96808932T>G	ColoRect-AdenoCA_TCGA	ENSG00000158050	DUSP2	chr2:96808908:-	0.30945	0.0694792	-1.79202	chr2	96808932	T	G	N/A	1	1
g.chr2:97513795T>A	ColoRect-AdenoCA_TCGA	ENSG00000213337	ANKRD39	chr2:97513777:-	0.365347	0.124518	-1.39809	chr2	97513795	T	A	N/A	1	2
g.chr2:97513799T>G	ColoRect-AdenoCA_TCGA	ENSG00000213337	ANKRD39	chr2:97513777:-	0.365347	0.114634	-1.49202	chr2	97513799	T	G	N/A	1	2
g.chr2:99015045A>T	Panc-AdenoCA_ICGC	ENSG00000144191	CNGA3	chr2:99015064:+	0.64723	0.198712	-2.00125	chr2	99015045	A	T	N/A	1	1
g.chr2:99215891T>A	Skin-Melanoma_ICGC	ENSG00000183513	COA5	chr2:99215837:-	0.838668	0.327651	-2.36718	chr2	99215891	T	A	N/A	1	1
g.chr3:101311845A>G	Liver-HCC_ICGC	ENSG00000081154	PCNP	chr3:101311863:+	0.644497	0.0704246	-3.17512	chr3	101311845	A	G	N/A	1	1
g.chr3:10168586A>T	Lung-AdenoCA_TCGA	ENSG00000254999	BRK1	chr3:10168532:+	0.152961	0.00279024	-4.16727	chr3	10168586	A	T	N/A	1	2
g.chr3:10168588A>T	Lung-AdenoCA_TCGA	ENSG00000254999	BRK1	chr3:10168532:+	0.152961	0.0200559	-2.17741	chr3	10168588	A	T	N/A	1	2
g.chr3:108100107T>C	Liver-HCC_ICGC	ENSG00000144821	MYH15	chr3:108100085:-	0.459367	0.235589	-1.01413	chr3	108100107	T	C	N/A	1	1
g.chr3:121150642T>G	ColoRect-AdenoCA_TCGA	ENSG00000051341	POLQ	chr3:121150625:-	0.407526	0.0763792	-2.11839	chr3	121150642	T	G	both	1	1
g.chr3:121663011A>G	Liver-HCC_ICGC	ENSG00000163406	SLC15A2	chr3:121663035:+	0.16614	0.0600797	-1.13689	chr3	121663011	A	G	N/A	1	1
g.chr3:122996735T>C	ColoRect-AdenoCA_TCGA	ENSG00000121542	RP11-797D24.3	chr3:122996752:+	0.389644	0.157016	-1.23179	chr3	122996735	T	C	N/A	1	1
g.chr3:124439645A>G	Liver-HCC_ICGC	ENSG00000160145	KALRN	chr3:124439662:+	0.459261	0.0799541	-2.27965	chr3	124439645	A	G	N/A	1	1
g.chr3:125724518T>C	Liver-HCC_ICGC	ENSG00000114544	SLC41A3	chr3:125724505:-	0.0893003	0.0178861	-1.68347	chr3	125724518	T	C	N/A	1	1
g.chr3:12625121T>G	Lung-AdenoCA_TCGA	ENSG00000132155	RAF1	chr3:12625057:-	0.741039	0.242934	-2.18804	chr3	12625121	T	G	oncogene	1	1
g.chr3:128882465T>G	ColoRect-AdenoCA_TCGA	ENSG00000169714	ISY1	chr3:128882449:-	0.680503	0.401097	-1.15698	chr3	128882465	T	G	tsg	1	1
g.chr3:130740809A>C	Ovary-AdenoCA_ICGC	ENSG00000017260	ASTE1	chr3:130740828:+	0.811222	0.307054	-2.2719	chr3	130740809	A	C	N/A	1	1
g.chr3:131103510A>C	ColoRect-AdenoCA_TCGA	ENSG00000198585	NUDT16	chr3:131103472:+	0.0322879	0.00908668	-1.29157	chr3	131103510	A	C	N/A	1	1
g.chr3:131181242A>C	Stomach-AdenoCA_ICGC	ENSG00000114686	MRPL3	chr3:131181244:-	0.653017	0.0210533	-4.47175	chr3	131181242	A	C	N/A	1	1
g.chr3:132277358T>C	ColoRect-AdenoCA_TCGA	ENSG00000240303	ACAD11	chr3:132277354:-	0.404437	0.17905	-1.13578	chr3	132277358	T	C	N/A	1	1
g.chr3:132398461A>C	ColoRect-AdenoCA_TCGA	ENSG00000081307	NPHP3	chr3:132398481:+	0.3624	0.133497	-1.30542	chr3	132398461	A	C	N/A	1	1
g.chr3:133318780A>G	ColoRect-AdenoCA_TCGA	ENSG00000163781	TOPBP1	chr3:133318763:-	0.311403	0.0851559	-1.5807	chr3	133318780	A	G	N/A	1	1
g.chr3:136056714A>G	Kidney-RCC_ICGC	ENSG00000114054	STAG1	chr3:136056738:+	0.631963	0.325028	-1.27141	chr3	136056714	A	G	N/A	1	1
g.chr3:138352203A>C	ColoRect-AdenoCA_TCGA	ENSG00000158234	FAIM	chr3:138352144:+	0.706951	0.238432	-2.04192	chr3	138352203	A	C	N/A	1	1
g.chr3:139236302T>A	Lung-SCC_TCGA	ENSG00000114115	RBP1	chr3:139236280:-	0.338316	0.103393	-1.48927	chr3	139236302	T	A	N/A	1	1
g.chr3:141876578T>G	ColoRect-AdenoCA_TCGA	ENSG00000175066	RP11-485G4.2	chr3:141876561:-	0.320375	0.119872	-1.2416	chr3	141876578	T	G	N/A	1	1
g.chr3:142526709A>C	ColoRect-AdenoCA_TCGA	ENSG00000144935	TRPC1	chr3:142526730:+	0.577685	0.12808	-2.23132	chr3	142526709	A	C	N/A	1	1
g.chr3:142782084A>G	ColoRect-AdenoCA_TCGA	ENSG00000163714	U2SURP	chr3:142782104:+	0.615337	0.0947098	-2.72724	chr3	142782084	A	G	N/A	1	1
g.chr3:1445109A>T	Eso-AdenoCa_ICGC	ENSG00000134115	CNTN6	chr3:1445123:+	0.507387	0.140951	-1.83697	chr3	1445109	A	T	N/A	1	1
g.chr3:153992189T>A	Lung-AdenoCA_TCGA	ENSG00000174953	DHX36	chr3:153992165:-	0.590995	0.32511	-1.09847	chr3	153992189	T	A	N/A	1	1
g.chr3:155658438A>G	Kidney-RCC_TCGA	ENSG00000163655	GMPS	chr3:155658457:+	0.375527	0.136009	-1.34027	chr3	155658438	A	G	fusion	1	1
g.chr3:157813765T>C	Skin-Melanoma_TCGA	ENSG00000168779	SHOX2	chr3:157813694:-	0.275274	0.103941	-1.18615	chr3	157813765	T	C	N/A	1	1
g.chr3:158323166T>A	Ovary-AdenoCA_ICGC	ENSG00000178053	MLF1	chr3:158323186:+	0.700818	0.0805607	-3.28595	chr3	158323166	T	A	tsg	1	1
g.chr3:160789138T>G	ColoRect-AdenoCA_TCGA	ENSG00000169255	PPM1L	chr3:160789117:-	0.472602	0.233869	-1.07689	chr3	160789138	T	G	N/A	1	1
g.chr3:160794246A>G	Kidney-RCC_ICGC	ENSG00000163590	PPM1L	chr3:160794264:+	0.545528	0.193177	-1.61211	chr3	160794246	A	G	N/A	1	1
g.chr3:167726805T>G	ColoRect-AdenoCA_TCGA	ENSG00000173905	GOLIM4	chr3:167726780:-	0.913001	0.529154	-2.23409	chr3	167726805	T	G	N/A	1	1
g.chr3:168801603T>G	Stomach-AdenoCA_TCGA	ENSG00000085276	MECOM	chr3:168801589:-	0.322719	0.146717	-1.01928	chr3	168801603	T	G	oncogene	1	1
g.chr3:170150825A>T	ColoRect-AdenoCA_TCGA	ENSG00000013297	CLDN11	chr3:170150841:+	0.365609	0.154482	-1.14878	chr3	170150825	A	T	N/A	1	1
g.chr3:170779312T>C	ColoRect-AdenoCA_TCGA	ENSG00000154310	TNIK	chr3:170779285:-	0.638008	0.147118	-2.32412	chr3	170779312	T	C	N/A	1	1
g.chr3:170780560A>G	Uterus-AdenoCA_TCGA	ENSG00000154310	TNIK	chr3:170780542:-	0.249118	0.0979297	-1.11712	chr3	170780560	A	G	N/A	1	1
g.chr3:171320194T>A	Uterus-AdenoCA_TCGA	ENSG00000075651	PLD1	chr3:171320178:-	0.293238	0.0114951	-3.57456	chr3	171320194	T	A	N/A	1	1
g.chr3:172539241A>G	Uterus-AdenoCA_TCGA	ENSG00000114346	ECT2	chr3:172539332:+	0.649912	0.163314	-2.25243	chr3	172539241	A	G	N/A	1	1
g.chr3:176742255A>G	Breast-AdenoCa_TCGA	ENSG00000177565	TBL1XR1	chr3:176742234:-	0.690189	0.430108	-1.08242	chr3	176742255	A	G	both	1	1
g.chr3:178735365T>G	ColoRect-AdenoCA_TCGA	ENSG00000172667	ZMAT3	chr3:178735348:-	0.36244	0.101617	-1.61459	chr3	178735365	T	G	N/A	1	1
g.chr3:178736030T>G	ColoRect-AdenoCA_TCGA	ENSG00000172667	ZMAT3	chr3:178736013:-	0.772491	0.294721	-2.09499	chr3	178736030	T	G	N/A	1	1
g.chr3:178952758A>G	Panc-AdenoCA_ICGC	ENSG00000121879	PIK3CA	chr3:178952815:+	0.492198	0.0702404	-2.55179	chr3	178952758	A	G	oncogene	1	1
g.chr3:178954501T>G	ColoRect-AdenoCA_TCGA	ENSG00000171121	PIK3CA	chr3:178954478:-	0.784549	0.215257	-2.5859	chr3	178954501	T	G	N/A	1	1
g.chr3:179052251A>C	ColoRect-AdenoCA_TCGA	ENSG00000121864	ZNF639	chr3:179052298:+	0.519882	0.248439	-1.18652	chr3	179052251	A	C	N/A	1	1
g.chr3:179518876T>C	Uterus-AdenoCA_TCGA	ENSG00000114757	PEX5L	chr3:179518857:-	0.221877	0.0773713	-1.22385	chr3	179518876	T	C	N/A	1	2
g.chr3:179518877T>G	Uterus-AdenoCA_TCGA	ENSG00000114757	PEX5L	chr3:179518857:-	0.221877	0.0524187	-1.63989	chr3	179518877	T	G	N/A	1	2
g.chr3:180694924A>G	Head-SCC_ICGC	ENSG00000114416	FXR1	chr3:180694950:+	0.831576	0.497962	-1.60499	chr3	180694924	A	G	N/A	1	1
g.chr3:180702360T>G	Panc-AdenoCA_ICGC	ENSG00000205981	DNAJC19	chr3:180702307:-	0.441077	0.0987823	-1.97404	chr3	180702360	T	G	N/A	1	1
g.chr3:181432200A>C	Eso-AdenoCa_ICGC	ENSG00000181449	SOX2	chr3:181432150:+	0.7884	0.28543	-2.233	chr3	181432200	A	C	oncogene	1	1
g.chr3:182647397T>C	Liver-HCC_ICGC	ENSG00000043093	DCUN1D1	chr3:182647368:-	0.756832	0.326552	-1.85921	chr3	182647397	T	C	N/A	1	1
g.chr3:182895851T>G	Lymph-BNHL_ICGC	ENSG00000053524	MCF2L2	chr3:182895829:-	0.692771	0.137539	-2.64899	chr3	182895851	T	G	N/A	1	1
g.chr3:183960228T>C	Stomach-AdenoCA_TCGA	ENSG00000214160	ALG3	chr3:183960211:-	0.138225	0.0181036	-2.16326	chr3	183960228	T	C	N/A	1	1
g.chr3:183977022T>C	Panc-Endocrine_ICGC	ENSG00000163888	CAMK2N2	chr3:183977097:-	0.0146842	0.00291944	-1.62725	chr3	183977022	T	C	N/A	1	1
g.chr3:184157422A>C	ColoRect-AdenoCA_TCGA	N/A	RP11-433C9.2	chr3:184157436:+	0.458011	0.115359	-1.86878	chr3	184157422	A	C	N/A	1	1
g.chr3:185357594T>C	Panc-AdenoCA_ICGC	ENSG00000073792	IGF2BP2	chr3:185357579:-	0.206401	0.0320939	-2.05971	chr3	185357594	T	C	tsg	1	1
g.chr3:186461713A>G	Liver-HCC_ICGC	ENSG00000113889	KNG1	chr3:186461743:+	0.561866	0.112469	-2.31451	chr3	186461713	A	G	N/A	2	2
g.chr3:186461713A>G	Liver-HCC_ICGC	ENSG00000113889	KNG1	chr3:186461743:+	0.561866	0.112469	-2.31451	chr3	186461713	A	G	N/A	2	2
g.chr3:186507664A>C	Liver-HCC_ICGC	ENSG00000156976	EIF4A2	chr3:186507686:+	0.94728	0.430221	-3.16956	chr3	186507664	A	C	fusion	1	1
g.chr3:190023520A>G	Skin-Melanoma_TCGA	ENSG00000163347	CLDN1	chr3:190023496:-	0.797036	0.192163	-2.80389	chr3	190023520	A	G	N/A	1	1
g.chr3:190374968A>C	ColoRect-AdenoCA_TCGA	ENSG00000196083	IL1RAP	chr3:190374986:+	0.789608	0.452463	-1.51329	chr3	190374968	A	C	N/A	1	1
g.chr3:191114181A>G	ColoRect-AdenoCA_TCGA	ENSG00000152492	CCDC50	chr3:191114194:+	0.469079	0.136083	-1.72437	chr3	191114181	A	G	N/A	1	1
g.chr3:191116433A>C	ColoRect-AdenoCA_TCGA	ENSG00000152492	CCDC50	chr3:191116448:+	0.706032	0.31482	-1.65387	chr3	191116433	A	C	N/A	1	1
g.chr3:191859872T>G	ColoRect-AdenoCA_TCGA	ENSG00000114279	FGF12	chr3:191859847:-	0.412043	0.101932	-1.82041	chr3	191859872	T	G	N/A	1	1
g.chr3:192514630T>A	Kidney-RCC_TCGA	ENSG00000180611	MB21D2	chr3:192514604:-	0.871076	0.705576	-1.03651	chr3	192514630	T	A	other	1	1
g.chr3:193415026A>G	Ovary-AdenoCA_ICGC	ENSG00000198836	OPA1	chr3:193415041:+	0.520908	0.116733	-2.10742	chr3	193415026	A	G	N/A	1	1
g.chr3:197398300A>C	Breast-AdenoCa_TCGA	ENSG00000145016	KIAA0226	chr3:197398264:-	0.36281	0.10014	-1.63248	chr3	197398300	A	C	N/A	1	1
g.chr3:197770575A>G	Liver-HCC_ICGC	ENSG00000185621	LMLN	chr3:197770519:+	0.819603	0.437002	-1.767	chr3	197770575	A	G	N/A	1	1
g.chr3:19920985T>G	ColoRect-AdenoCA_TCGA	ENSG00000163576	EFHB	chr3:19920964:-	0.582424	0.27776	-1.28833	chr3	19920985	T	G	N/A	1	1
g.chr3:21460236T>G	ColoRect-AdenoCA_TCGA	ENSG00000151789	ZNF385D	chr3:21460220:-	0.381434	0.115892	-1.54846	chr3	21460236	T	G	N/A	1	1
g.chr3:21461252T>C	Liver-HCC_ICGC	ENSG00000151789	ZNF385D	chr3:21461229:-	0.569964	0.233539	-1.47014	chr3	21461252	T	C	N/A	1	1
g.chr3:21462062T>C	ColoRect-AdenoCA_TCGA	ENSG00000151789	ZNF385D	chr3:21462043:-	0.355827	0.122029	-1.37983	chr3	21462062	T	C	N/A	1	1
g.chr3:27415506A>G	CNS-Medullo_ICGC	ENSG00000033867	SLC4A7	chr3:27415485:-	0.40219	0.187343	-1.07102	chr3	27415506	A	G	N/A	1	1
g.chr3:32815345A>T	Liver-HCC_ICGC	ENSG00000182973	CNOT10	chr3:32815367:+	0.418503	0.108293	-1.77938	chr3	32815345	A	T	N/A	1	1
g.chr3:33908884A>G	Liver-HCC_TCGA	ENSG00000170248	PDCD6IP	chr3:33908901:+	0.318947	0.0787293	-1.70112	chr3	33908884	A	G	N/A	1	1
g.chr3:37030606T>C	Liver-HCC_ICGC	ENSG00000178567	EPM2AIP1	chr3:37030584:-	0.666559	0.275018	-1.66198	chr3	37030606	T	C	N/A	1	1
g.chr3:38532661A>C	ColoRect-AdenoCA_TCGA	ENSG00000114739	ACVR2B	chr3:38532685:+	0.696463	0.307807	-1.6409	chr3	38532661	A	C	N/A	1	1
g.chr3:3889592T>C	Liver-HCC_ICGC	ENSG00000175928	LRRN1	chr3:3889617:+	0.452738	0.129817	-1.71296	chr3	3889592	T	C	N/A	1	1
g.chr3:40353838A>C	ColoRect-AdenoCA_TCGA	ENSG00000114784	EIF1B	chr3:40353894:+	0.731666	0.393642	-1.43512	chr3	40353838	A	C	N/A	1	1
g.chr3:42267363A>G	Stomach-AdenoCA_TCGA	ENSG00000182606	TRAK1	chr3:42267382:+	0.738304	0.0969912	-3.26829	chr3	42267363	A	G	N/A	1	1
g.chr3:43120740T>A	Liver-HCC_ICGC	ENSG00000144647	POMGNT2	chr3:43120726:-	0.633021	0.00767183	-5.4077	chr3	43120740	T	A	N/A	1	1
g.chr3:43392606A>C	ColoRect-AdenoCA_TCGA	ENSG00000163788	SNRK	chr3:43392635:+	0.680993	0.221513	-2.01521	chr3	43392606	A	C	N/A	1	1
g.chr3:44483724T>G	ColoRect-AdenoCA_TCGA	ENSG00000185219	ZNF445	chr3:44483695:-	0.350481	0.0590573	-2.15145	chr3	44483724	T	G	N/A	1	1
g.chr3:44778553A>C	Skin-Melanoma_ICGC	ENSG00000186446	ZNF501	chr3:44778575:+	0.841251	0.306785	-2.48276	chr3	44778553	A	C	N/A	1	1
g.chr3:45123796A>T	Breast-AdenoCa_ICGC	ENSG00000163814	CDCP1	chr3:45123769:-	0.319931	0.0627187	-1.95024	chr3	45123796	A	T	N/A	1	1
g.chr3:49757372T>G	Panc-AdenoCA_ICGC	ENSG00000173540	GMPPB	chr3:49757349:-	0.270486	0.0821499	-1.42133	chr3	49757372	T	G	N/A	1	1
g.chr3:52002545T>C	Breast-AdenoCa_TCGA	ENSG00000114779	ABHD14B	chr3:52002531:-	0.437343	0.0432397	-2.84484	chr3	52002545	T	C	N/A	1	1
g.chr3:52082958T>C	Liver-HCC_ICGC	ENSG00000164086	DUSP7	chr3:52082935:-	0.488146	0.137263	-1.79079	chr3	52082958	T	C	N/A	1	1
g.chr3:5221395A>C	ColoRect-AdenoCA_TCGA	ENSG00000134108	ARL8B	chr3:5221422:+	0.620309	0.221688	-1.74671	chr3	5221395	A	C	N/A	1	3
g.chr3:5221399A>C	ColoRect-AdenoCA_TCGA	ENSG00000134108	ARL8B	chr3:5221422:+	0.620309	0.254634	-1.56491	chr3	5221399	A	C	N/A	2	3
g.chr3:5221399A>C	ColoRect-AdenoCA_TCGA	ENSG00000134108	ARL8B	chr3:5221422:+	0.620309	0.254634	-1.56491	chr3	5221399	A	C	N/A	2	3
g.chr3:5226095A>C	ColoRect-AdenoCA_TCGA	ENSG00000134108	AC026202.3	chr3:5226114:+	0.806797	0.154555	-3.12864	chr3	5226095	A	C	N/A	1	1
g.chr3:52577685A>G	Liver-HCC_ICGC	ENSG00000163939	SMIM4	chr3:52577667:-	0.56774	0.308118	-1.08157	chr3	52577685	A	G	tsg	1	1
g.chr3:52730155A>G	ColoRect-AdenoCA_TCGA	ENSG00000163938	GLT8D1	chr3:52730178:+	0.391853	0.143764	-1.34484	chr3	52730155	A	G	N/A	1	1
g.chr3:53850417T>A	Skin-Melanoma_TCGA	ENSG00000016391	CHDH	chr3:53850387:-	0.317181	0.122346	-1.20364	chr3	53850417	T	A	N/A	1	2
g.chr3:53850420T>G	Skin-Melanoma_TCGA	ENSG00000016391	CHDH	chr3:53850387:-	0.317181	0.131838	-1.11805	chr3	53850420	T	G	N/A	1	2
g.chr3:53918683T>G	ColoRect-AdenoCA_TCGA	ENSG00000113811	ACTR8	chr3:53918649:-	0.128068	0.0252012	-1.73719	chr3	53918683	T	G	N/A	1	1
g.chr3:57128346T>G	Panc-AdenoCA_ICGC	ENSG00000144730	IL17RD	chr3:57128328:-	0.694191	0.357747	-1.40494	chr3	57128346	T	G	N/A	1	1
g.chr3:59733024T>C	Lymph-BNHL_ICGC	ENSG00000189283	FHIT	chr3:59733003:-	0.874443	0.290165	-2.83541	chr3	59733024	T	C	tsg	1	1
g.chr3:63992141T>G	Prost-AdenoCA_ICGC	ENSG00000163636	PSMD6-AS2	chr3:63992120:-	0.127555	0.0444998	-1.14399	chr3	63992141	T	G	N/A	1	1
g.chr3:66428486A>T	Skin-Melanoma_ICGC	ENSG00000144741	LRIG1	chr3:66428532:+	0.296478	0.0228642	-2.89093	chr3	66428486	A	T	N/A	1	1
g.chr3:70017465T>G	Ovary-AdenoCA_TCGA	ENSG00000187098	MITF	chr3:70017483:+	0.528126	0.0935396	-2.38379	chr3	70017465	T	G	oncogene	1	1
g.chr3:86122779A>C	ColoRect-AdenoCA_TCGA	ENSG00000175161	CADM2	chr3:86122809:+	0.772966	0.26098	-2.26601	chr3	86122779	A	C	N/A	1	1
g.chr3:87304889A>C	Liver-HCC_ICGC	ENSG00000083937	CHMP2B	chr3:87304914:+	0.528547	0.0834359	-2.51087	chr3	87304889	A	C	N/A	1	1
g.chr3:8788429A>G	ColoRect-AdenoCA_TCGA	ENSG00000182533	CAV3	chr3:8788444:+	0.228025	0.0595757	-1.53959	chr3	8788429	A	G	N/A	1	1
g.chr3:93592626T>G	ColoRect-AdenoCA_TCGA	ENSG00000184500	PROS1	chr3:93592610:-	0.236546	0.0328688	-2.2101	chr3	93592626	T	G	N/A	1	1
g.chr3:93848120A>C	ColoRect-AdenoCA_TCGA	ENSG00000178694	NSUN3	chr3:93848141:+	0.172471	0.0709802	-1.00351	chr3	93848120	A	C	N/A	1	1
g.chr3:9518618A>C	ColoRect-AdenoCA_TCGA	ENSG00000168137	SETD5	chr3:9518634:+	0.2541	0.0471602	-1.92903	chr3	9518618	A	C	N/A	1	1
g.chr3:98293956T>C	Liver-HCC_TCGA	ENSG00000080819	CPOX	chr3:98293937:-	0.689822	0.200588	-2.18191	chr3	98293956	T	C	N/A	1	1
g.chr3:98512423T>G	Liver-HCC_ICGC	ENSG00000057019	ST3GAL6	chr3:98512404:-	0.405956	0.0422554	-2.74014	chr3	98512423	T	G	N/A	1	1
g.chr3:99518044T>A	Liver-HCC_ICGC	ENSG00000144810	COL8A1	chr3:99518061:+	0.698519	0.376327	-1.34542	chr3	99518044	T	A	N/A	1	1
g.chr4:100819938T>A	Breast-AdenoCa_TCGA	ENSG00000164031	DNAJB14	chr4:100819919:-	0.499772	0.228732	-1.21457	chr4	100819938	T	A	N/A	1	1
g.chr4:103999268T>G	Liver-HCC_ICGC	ENSG00000164039	SLC9B2	chr4:103999251:-	0.385618	0.175792	-1.07935	chr4	103999268	T	G	N/A	1	1
g.chr4:108836169A>C	ColoRect-AdenoCA_TCGA	ENSG00000164023	SGMS2	chr4:108836185:+	0.582418	0.145214	-2.10535	chr4	108836169	A	C	N/A	1	1
g.chr4:109553552A>C	ColoRect-AdenoCA_TCGA	ENSG00000109475	RPL34	chr4:109553569:+	0.519767	0.125052	-2.02454	chr4	109553552	A	C	N/A	1	1
g.chr4:109732152A>G	Ovary-AdenoCA_ICGC	ENSG00000188517	COL25A1	chr4:109732127:-	0.290987	0.0783683	-1.57413	chr4	109732152	A	G	N/A	1	1
g.chr4:114815555T>G	ColoRect-AdenoCA_TCGA	ENSG00000180801	ARSJ	chr4:114815540:-	0.708292	0.214253	-2.18658	chr4	114815555	T	G	N/A	1	1
g.chr4:119636564A>G	Uterus-AdenoCA_TCGA	ENSG00000145388	METTL14	chr4:119636585:+	0.889729	0.387187	-2.54713	chr4	119636564	A	G	N/A	1	1
g.chr4:122738046A>C	ColoRect-AdenoCA_TCGA	ENSG00000123737	CCNA2	chr4:122738064:+	0.679767	0.34924	-1.37508	chr4	122738046	A	C	N/A	1	1
g.chr4:122799261T>C	ColoRect-AdenoCA_TCGA	ENSG00000138741	TRPC3	chr4:122799245:-	0.513559	0.138341	-1.88339	chr4	122799261	T	C	N/A	1	1
g.chr4:123666077A>G	Lung-SCC_TCGA	ENSG00000181004	BBS12	chr4:123666094:+	0.478649	0.0554338	-2.75008	chr4	123666077	A	G	N/A	1	1
g.chr4:125586821T>G	ColoRect-AdenoCA_TCGA	ENSG00000151458	ANKRD50	chr4:125586797:-	0.687348	0.406652	-1.16557	chr4	125586821	T	G	N/A	1	1
g.chr4:129796357A>C	ColoRect-AdenoCA_TCGA	ENSG00000077684	PHF17	chr4:129796379:+	0.718641	0.16996	-2.52364	chr4	129796357	A	C	N/A	1	1
g.chr4:129798915T>G	Liver-HCC_ICGC	ENSG00000151466	PHF17	chr4:129798898:-	0.83051	0.0666801	-4.22809	chr4	129798915	T	G	N/A	1	1
g.chr4:142654592A>C	Kidney-RCC_TCGA	ENSG00000164136	IL15	chr4:142654612:+	0.761473	0.350817	-1.77622	chr4	142654592	A	C	N/A	1	1
g.chr4:144394435A>G	Lung-SCC_TCGA	ENSG00000109458	GAB1	chr4:144394452:+	0.840557	0.621331	-1.16718	chr4	144394435	A	G	N/A	1	1
g.chr4:144474549A>C	Uterus-AdenoCA_TCGA	ENSG00000153147	SMARCA5	chr4:144474571:+	0.837813	0.21039	-2.96462	chr4	144474549	A	C	N/A	1	1
g.chr4:145666401T>C	ColoRect-AdenoCA_TCGA	ENSG00000164161	HHIP	chr4:145666423:+	0.778917	0.455389	-1.43828	chr4	145666401	T	C	N/A	1	1
g.chr4:145915743T>G	ColoRect-AdenoCA_TCGA	ENSG00000164162	ANAPC10	chr4:145915728:-	0.670356	0.205468	-2.06226	chr4	145915743	T	G	N/A	1	1
g.chr4:146678802T>A	ColoRect-AdenoCA_TCGA	ENSG00000151612	ZNF827	chr4:146678779:-	0.653959	0.365516	-1.18799	chr4	146678802	T	A	N/A	1	1
g.chr4:146679256T>C	Thy-AdenoCA_TCGA	ENSG00000151612	ZNF827	chr4:146679237:-	0.475806	0.233452	-1.09207	chr4	146679256	T	C	N/A	1	1
g.chr4:153539931T>G	Eso-AdenoCa_ICGC	ENSG00000170006	TMEM154	chr4:153539915:-	0.194818	0.0380455	-1.81118	chr4	153539931	T	G	N/A	1	1
g.chr4:15606657T>G	ColoRect-AdenoCA_TCGA	ENSG00000118564	FBXL5	chr4:15606629:-	0.915546	0.550427	-2.18092	chr4	15606657	T	G	N/A	1	2
g.chr4:15606661T>C	Biliary-AdenoCA_ICGC	ENSG00000118564	FBXL5	chr4:15606629:-	0.915546	0.553269	-2.16943	chr4	15606661	T	C	N/A	1	2
g.chr4:156841535A>G	Prost-AdenoCA_ICGC	ENSG00000151790	TDO2	chr4:156841549:+	0.666726	0.278471	-1.64547	chr4	156841535	A	G	N/A	1	1
g.chr4:164045963T>C	Stomach-AdenoCA_TCGA	ENSG00000145414	NAF1	chr4:164045945:-	0.459977	0.228809	-1.05462	chr4	164045963	T	C	N/A	1	1
g.chr4:164447000T>G	ColoRect-AdenoCA_TCGA	ENSG00000145416	MARCH1	chr4:164446980:-	0.542646	0.143641	-1.95638	chr4	164447000	T	G	N/A	1	1
g.chr4:166264435A>C	Liver-HCC_ICGC	ENSG00000052802	MSMO1	chr4:166264451:+	0.362293	0.0866758	-1.78949	chr4	166264435	A	C	N/A	1	1
g.chr4:167654766T>A	Liver-HCC_TCGA	ENSG00000196104	SPOCK3	chr4:167654738:-	0.764807	0.509339	-1.14186	chr4	167654766	T	A	N/A	1	1
g.chr4:170314562T>C	ColoRect-AdenoCA_TCGA	ENSG00000137601	NEK1	chr4:170314544:-	0.833231	0.433897	-1.87467	chr4	170314562	T	C	N/A	1	1
g.chr4:175412247T>G	ColoRect-AdenoCA_TCGA	ENSG00000164120	HPGD	chr4:175412221:-	0.592805	0.297237	-1.23606	chr4	175412247	T	G	N/A	1	1
g.chr4:17631586A>C	ColoRect-AdenoCA_TCGA	ENSG00000118579	MED28	chr4:17631606:+	0.357748	0.101231	-1.59847	chr4	17631586	A	C	N/A	1	1
g.chr4:17631849A>T	Ovary-AdenoCA_ICGC	ENSG00000118579	MED28	chr4:17631874:+	0.475267	0.117134	-1.92085	chr4	17631849	A	T	N/A	1	1
g.chr4:17632540T>G	ColoRect-AdenoCA_TCGA	ENSG00000047662	MED28	chr4:17632514:-	0.640991	0.249137	-1.68289	chr4	17632540	T	G	N/A	1	1
g.chr4:177263426A>C	ColoRect-AdenoCA_TCGA	ENSG00000129128	SPCS3	chr4:177263440:+	0.344461	0.155749	-1.04672	chr4	177263426	A	C	N/A	1	1
g.chr4:177598112T>A	Stomach-AdenoCA_TCGA	ENSG00000150630	RP11-313E19.2	chr4:177598088:-	0.542291	0.109021	-2.27035	chr4	177598112	T	A	N/A	1	1
g.chr4:177602890T>G	ColoRect-AdenoCA_TCGA	ENSG00000150630	VEGFC	chr4:177602869:-	0.915222	0.511578	-2.33281	chr4	177602890	T	G	N/A	1	1
g.chr4:177604709T>C	ColoRect-AdenoCA_TCGA	ENSG00000150630	VEGFC	chr4:177604689:-	0.649216	0.164111	-2.24355	chr4	177604709	T	C	N/A	1	1
g.chr4:183795672A>C	ColoRect-AdenoCA_TCGA	ENSG00000129187	DCTD	chr4:183795653:-	0.402064	0.10754	-1.71924	chr4	183795672	A	C	N/A	1	1
g.chr4:185309082T>C	ColoRect-AdenoCA_TCGA	ENSG00000168310	IRF2	chr4:185309049:-	0.57088	0.193509	-1.71281	chr4	185309082	T	C	N/A	1	1
g.chr4:185676773T>C	Liver-HCC_ICGC	ENSG00000151726	ACSL1	chr4:185676749:-	0.56708	0.22426	-1.51096	chr4	185676773	T	C	N/A	1	1
g.chr4:186081276T>C	CNS-Medullo_ICGC	ENSG00000164323	KIAA1430	chr4:186081251:-	0.910293	0.387111	-2.77669	chr4	186081276	T	C	N/A	1	1
g.chr4:186285106A>C	ColoRect-AdenoCA_TCGA	ENSG00000109762	SNX25	chr4:186285048:+	0.60329	0.114058	-2.46913	chr4	186285106	A	C	N/A	1	1
g.chr4:187134143A>G	ColoRect-AdenoCA_TCGA	ENSG00000145476	CYP4V2	chr4:187134165:+	0.637137	0.210089	-1.88735	chr4	187134143	A	G	N/A	1	1
g.chr4:24529113T>G	ColoRect-AdenoCA_TCGA	ENSG00000109606	DHX15	chr4:24529098:-	0.7576	0.168389	-2.73665	chr4	24529113	T	G	N/A	1	1
g.chr4:24805159T>C	ColoRect-AdenoCA_TCGA	ENSG00000181982	SOD3	chr4:24805138:-	0.719819	0.0395505	-4.13339	chr4	24805159	T	C	N/A	1	1
g.chr4:248733T>C	ColoRect-AdenoCA_TCGA	ENSG00000186777	ZNF876P	chr4:248717:-	0.536039	0.270537	-1.1363	chr4	248733	T	C	N/A	1	1
g.chr4:25373912A>C	ColoRect-AdenoCA_TCGA	ENSG00000168228	ZCCHC4	chr4:25373933:+	0.652436	0.135901	-2.47952	chr4	25373912	A	C	N/A	1	1
g.chr4:261982T>G	ColoRect-AdenoCA_TCGA	ENSG00000186777	ZNF732	chr4:261963:-	0.776724	0.388613	-1.69982	chr4	261982	T	G	N/A	1	1
g.chr4:39500400T>A	Prost-AdenoCA_ICGC	ENSG00000109814	UGDH	chr4:39500378:-	0.561411	0.138121	-2.07787	chr4	39500400	T	A	N/A	1	1
g.chr4:39551735T>G	ColoRect-AdenoCA_TCGA	ENSG00000163683	SMIM14	chr4:39551712:-	0.630157	0.164801	-2.15582	chr4	39551735	T	G	N/A	1	1
g.chr4:39783935A>G	Lymph-BNHL_ICGC	ENSG00000078140	UBE2K	chr4:39783962:+	0.403184	0.150729	-1.33668	chr4	39783935	A	G	N/A	1	1
g.chr4:40157168A>C	ColoRect-AdenoCA_TCGA	ENSG00000078177	N4BP2	chr4:40157191:+	0.19958	0.0294707	-2.10552	chr4	40157168	A	C	tsg	1	1
g.chr4:41959138T>C	ColoRect-AdenoCA_TCGA	ENSG00000109133	TMEM33	chr4:41959161:+	0.500774	0.242283	-1.1433	chr4	41959138	T	C	N/A	1	1
g.chr4:42112973T>G	ColoRect-AdenoCA_TCGA	ENSG00000188848	BEND4	chr4:42112972:-	0.672696	0.255943	-1.78757	chr4	42112973	T	G	N/A	1	1
g.chr4:46250708T>G	ColoRect-AdenoCA_TCGA	ENSG00000151834	GABRA2	chr4:46250687:-	0.441074	0.185945	-1.23977	chr4	46250708	T	G	N/A	1	1
g.chr4:48863816A>C	ColoRect-AdenoCA_TCGA	ENSG00000109180	OCIAD1	chr4:48863862:+	0.494355	0.158443	-1.64728	chr4	48863816	A	C	N/A	1	1
g.chr4:53609708T>G	ColoRect-AdenoCA_TCGA	ENSG00000226887	ERVMER34-1	chr4:53609684:-	0.808482	0.332693	-2.1362	chr4	53609708	T	G	N/A	1	1
g.chr4:55164388A>G	Stomach-AdenoCA_ICGC	ENSG00000134853	PDGFRA	chr4:55164412:+	0.863654	0.472445	-1.95631	chr4	55164388	A	G	oncogene	1	1
g.chr4:55605768A>G	Skin-Melanoma_ICGC	ENSG00000157404	KIT	chr4:55605805:+	0.137868	0.0174078	-2.20016	chr4	55605768	A	G	oncogene	1	1
g.chr4:56292325A>C	Liver-HCC_ICGC	ENSG00000134851	TMEM165	chr4:56292266:+	0.704366	0.458026	-1.03647	chr4	56292325	A	C	N/A	1	1
g.chr4:57195586A>G	Lung-SCC_TCGA	ENSG00000109265	KIAA1211	chr4:57195603:+	0.805412	0.0607526	-4.15874	chr4	57195586	A	G	N/A	1	1
g.chr4:5830754A>C	ColoRect-AdenoCA_TCGA	ENSG00000072840	EVC	chr4:5830818:+	0.537564	0.183158	-1.64564	chr4	5830754	A	C	N/A	1	1
g.chr4:62937511A>C	ColoRect-AdenoCA_TCGA	ENSG00000150471	LPHN3	chr4:62937538:+	0.650362	0.355373	-1.21614	chr4	62937511	A	C	N/A	1	1
g.chr4:66186035T>A	Stomach-AdenoCA_ICGC	ENSG00000145242	EPHA5	chr4:66186019:-	0.260864	0.0935622	-1.22942	chr4	66186035	T	A	N/A	1	2
g.chr4:66186035T>C	ColoRect-AdenoCA_TCGA	ENSG00000145242	EPHA5	chr4:66186019:-	0.260864	0.0883139	-1.29292	chr4	66186035	T	C	N/A	1	2
g.chr4:675799A>G	Biliary-AdenoCA_ICGC	ENSG00000215375	MFSD7	chr4:675817:+	0.0131669	0.00306619	-1.46745	chr4	675799	A	G	N/A	1	1
g.chr4:71555878A>C	ColoRect-AdenoCA_TCGA	ENSG00000132467	UTP3	chr4:71555852:+	0.373079	0.173297	-1.04341	chr4	71555878	A	C	N/A	2	2
g.chr4:71555878A>C	ColoRect-AdenoCA_TCGA	ENSG00000132467	UTP3	chr4:71555852:+	0.373079	0.173297	-1.04341	chr4	71555878	A	C	N/A	2	2
g.chr4:71686397T>G	ColoRect-AdenoCA_TCGA	ENSG00000132463	GRSF1	chr4:71686306:-	0.938015	0.627309	-2.19618	chr4	71686397	T	G	N/A	1	1
g.chr4:75974053T>C	Eso-AdenoCa_ICGC	ENSG00000169116	PARM1	chr4:75974077:+	0.467464	0.0915406	-2.16464	chr4	75974053	T	C	N/A	1	1
g.chr4:76735344T>C	Skin-Melanoma_ICGC	ENSG00000138768	USO1	chr4:76735366:+	0.871546	0.483395	-1.98114	chr4	76735344	T	C	N/A	1	1
g.chr4:77232259T>G	Breast-AdenoCa_ICGC	ENSG00000272414	CCDC158	chr4:77232283:+	0.710238	0.252296	-1.98295	chr4	77232259	T	G	N/A	1	1
g.chr4:77235170A>C	ColoRect-AdenoCA_TCGA	ENSG00000272414	CCDC158	chr4:77235188:+	0.91114	0.371376	-2.85395	chr4	77235170	A	C	N/A	1	1
g.chr4:7753377T>G	ColoRect-AdenoCA_TCGA	ENSG00000196526	AFAP1-AS1	chr4:7753357:-	0.575717	0.151502	-2.02809	chr4	7753377	T	G	N/A	1	1
g.chr4:81222168A>C	ColoRect-AdenoCA_TCGA	ENSG00000138675	FGF5	chr4:81222185:+	0.66232	0.131915	-2.55779	chr4	81222168	A	C	N/A	1	1
g.chr4:83274611T>G	ColoRect-AdenoCA_TCGA	ENSG00000138668	HNRNPD	chr4:83274574:-	0.396346	0.174771	-1.13147	chr4	83274611	T	G	N/A	1	1
g.chr4:83402941T>G	ColoRect-AdenoCA_TCGA	ENSG00000249242	TMEM150C	chr4:83402922:-	0.332559	0.0787532	-1.76277	chr4	83402941	T	G	N/A	1	1
g.chr4:83550706T>G	ColoRect-AdenoCA_TCGA	ENSG00000145284	SCD5	chr4:83550667:-	0.947587	0.255261	-3.96552	chr4	83550706	T	G	N/A	1	1
g.chr4:83739690A>G	ColoRect-AdenoCA_TCGA	ENSG00000138674	SEC31A	chr4:83739713:-	0.180079	0.0630505	-1.18288	chr4	83739690	A	G	N/A	1	1
g.chr4:84527011A>T	Breast-AdenoCa_TCGA	ENSG00000138678	AGPAT9	chr4:84527028:+	0.872072	0.671536	-1.20426	chr4	84527011	A	T	N/A	1	1
g.chr4:92520455A>C	ColoRect-AdenoCA_TCGA	ENSG00000184305	CCSER1	chr4:92520478:+	0.356032	0.085842	-1.77287	chr4	92520455	A	C	N/A	1	1
g.chr4:99392452T>G	ColoRect-AdenoCA_TCGA	ENSG00000168785	TSPAN5	chr4:99392436:-	0.313037	0.0602231	-1.96163	chr4	99392452	T	G	N/A	1	1
g.chr4:99983940A>C	ColoRect-AdenoCA_TCGA	ENSG00000164024	METAP1	chr4:99983960:+	0.894359	0.386238	-2.59921	chr4	99983940	A	C	N/A	1	1
g.chr5:100146947T>G	ColoRect-AdenoCA_TCGA	ENSG00000113532	ST8SIA4	chr5:100146924:-	0.404065	0.0775664	-2.08732	chr5	100146947	T	G	N/A	1	1
g.chr5:112180657A>C	ColoRect-AdenoCA_TCGA	ENSG00000134982	APC	chr5:112180676:+	0.338676	0.0804536	-1.767	chr5	112180657	A	C	tsg	1	1
g.chr5:112214194T>G	ColoRect-AdenoCA_TCGA	ENSG00000129625	REEP5	chr5:112214177:-	0.636034	0.308364	-1.36597	chr5	112214194	T	G	N/A	1	1
g.chr5:112356742A>C	ColoRect-AdenoCA_TCGA	ENSG00000172795	DCP2	chr5:112356763:+	0.307181	0.0508472	-2.11342	chr5	112356742	A	C	N/A	1	1
g.chr5:112929386A>G	Stomach-AdenoCA_ICGC	ENSG00000047188	YTHDC2	chr5:112929405:+	0.661369	0.264433	-1.69246	chr5	112929386	A	G	N/A	2	2
g.chr5:112929386A>G	Stomach-AdenoCA_ICGC	ENSG00000047188	YTHDC2	chr5:112929405:+	0.661369	0.264433	-1.69246	chr5	112929386	A	G	N/A	2	2
g.chr5:114461342T>C	Liver-HCC_ICGC	ENSG00000152503	TRIM36	chr5:114461322:-	0.621476	0.133395	-2.36709	chr5	114461342	T	C	N/A	1	1
g.chr5:114855093T>C	Liver-HCC_ICGC	ENSG00000145780	FEM1C	chr5:114855076:-	0.286228	0.107417	-1.20363	chr5	114855093	T	C	N/A	1	1
g.chr5:115628967A>C	ColoRect-AdenoCA_TCGA	ENSG00000145781	COMMD10	chr5:115628984:+	0.852121	0.190245	-3.19975	chr5	115628967	A	C	N/A	1	1
g.chr5:115630582A>T	ColoRect-AdenoCA_TCGA	ENSG00000145781	COMMD10	chr5:115630604:+	0.542514	0.295144	-1.04099	chr5	115630582	A	T	N/A	1	1
g.chr5:118170804A>C	Kidney-RCC_ICGC	ENSG00000169570	DTWD2	chr5:118170781:-	0.51803	0.224001	-1.31465	chr5	118170804	A	C	N/A	1	1
g.chr5:118584800A>G	Liver-HCC_ICGC	ENSG00000172869	DMXL1	chr5:118584818:+	0.536332	0.25043	-1.24191	chr5	118584800	A	G	N/A	1	1
g.chr5:118730277T>A	Lymph-BNHL_ICGC	ENSG00000145779	TNFAIP8	chr5:118730219:+	0.807974	0.290125	-2.33167	chr5	118730277	T	A	N/A	1	1
g.chr5:120025362A>G	ColoRect-AdenoCA_TCGA	ENSG00000184838	PRR16	chr5:120025446:+	0.595399	0.346673	-1.02003	chr5	120025362	A	G	N/A	1	1
g.chr5:122951461A>C	ColoRect-AdenoCA_TCGA	ENSG00000151292	CSNK1G3	chr5:122951484:+	0.495725	0.0707188	-2.5586	chr5	122951461	A	C	N/A	2	2
g.chr5:122951461A>C	ColoRect-AdenoCA_TCGA	ENSG00000151292	CSNK1G3	chr5:122951484:+	0.495725	0.0707188	-2.5586	chr5	122951461	A	C	N/A	2	2
g.chr5:123972630T>G	ColoRect-AdenoCA_TCGA	ENSG00000168916	ZNF608	chr5:123972608:-	0.856266	0.185532	-3.26393	chr5	123972630	T	G	N/A	1	1
g.chr5:126380925T>G	ColoRect-AdenoCA_TCGA	ENSG00000164241	C5orf63	chr5:126380909:-	0.331706	0.0624026	-2.00924	chr5	126380925	T	G	N/A	1	1
g.chr5:126890756A>G	Liver-HCC_ICGC	ENSG00000164244	PRRC1	chr5:126890773:+	0.915497	0.465365	-2.52144	chr5	126890756	A	G	N/A	1	1
g.chr5:128449808A>C	ColoRect-AdenoCA_TCGA	ENSG00000066583	ISOC1	chr5:128449825:+	0.37907	0.0866054	-1.86231	chr5	128449808	A	C	N/A	1	1
g.chr5:129074359A>G	ColoRect-AdenoCA_TCGA	ENSG00000145808	ADAMTS19	chr5:129074374:+	0.60106	0.0289795	-3.92164	chr5	129074359	A	G	N/A	1	1
g.chr5:131987439A>C	ColoRect-AdenoCA_TCGA	ENSG00000113522	AC004041.2	chr5:131987460:+	0.368648	0.116086	-1.49201	chr5	131987439	A	C	N/A	1	2
g.chr5:131987440A>T	Panc-AdenoCA_ICGC	ENSG00000113522	AC004041.2	chr5:131987460:+	0.368648	0.0782575	-1.92824	chr5	131987440	A	T	N/A	1	2
g.chr5:132032142T>G	ColoRect-AdenoCA_TCGA	ENSG00000131437	KIF3A	chr5:132032117:-	0.379147	0.145405	-1.27793	chr5	132032142	T	G	N/A	1	1
g.chr5:132440149A>G	Lung-SCC_TCGA	ENSG00000170606	HSPA4	chr5:132440166:+	0.252449	0.062815	-1.61709	chr5	132440149	A	G	N/A	1	1
g.chr5:137082697T>G	ColoRect-AdenoCA_TCGA	ENSG00000177733	RP11-381K20.5	chr5:137082680:-	0.693874	0.225561	-2.05184	chr5	137082697	T	G	N/A	1	1
g.chr5:137267190T>C	Ovary-AdenoCA_ICGC	ENSG00000031003	PKD2L2	chr5:137267167:-	0.786953	0.261769	-2.34345	chr5	137267190	T	C	N/A	1	1
g.chr5:137451371T>A	Liver-HCC_ICGC	ENSG00000112981	NME5	chr5:137451353:-	0.421835	0.172284	-1.25428	chr5	137451371	T	A	N/A	1	1
g.chr5:139495539A>T	Eso-AdenoCa_ICGC	ENSG00000185129	PURA	chr5:139495513:+	0.348159	0.154828	-1.07008	chr5	139495539	A	T	N/A	1	1
g.chr5:140390656A>C	ColoRect-AdenoCA_TCGA	ENSG00000243232	PCDHA9	chr5:140390675:+	0.530319	0.248772	-1.2266	chr5	140390656	A	C	N/A	1	1
g.chr5:140504245A>G	ColoRect-AdenoCA_TCGA	ENSG00000081818	PCDHB4	chr5:140504263:+	0.655405	0.311992	-1.43371	chr5	140504245	A	G	N/A	1	1
g.chr5:140532844A>C	ColoRect-AdenoCA_TCGA	ENSG00000113211	PCDHB6	chr5:140532864:+	0.883517	0.344733	-2.66844	chr5	140532844	A	C	N/A	1	1
g.chr5:140555033T>C	ColoRect-AdenoCA_TCGA	ENSG00000113212	PCDHB7	chr5:140555063:+	0.429418	0.19381	-1.14122	chr5	140555033	T	C	N/A	1	1
g.chr5:140584801A>C	ColoRect-AdenoCA_TCGA	ENSG00000197479	PCDHB11	chr5:140584818:+	0.699923	0.449838	-1.04826	chr5	140584801	A	C	N/A	1	1
g.chr5:141336302A>C	ColoRect-AdenoCA_TCGA	ENSG00000081791	PCDH12	chr5:141336319:+	0.0455576	0.00779906	-1.80377	chr5	141336302	A	C	N/A	1	1
g.chr5:141971764A>C	Breast-AdenoCa_ICGC	ENSG00000113578	FGF1	chr5:141971743:-	0.818968	0.201186	-2.88827	chr5	141971764	A	C	N/A	1	1
g.chr5:141973142A>G	Liver-HCC_ICGC	ENSG00000113578	FGF1	chr5:141973122:-	0.243635	0.0404401	-2.0338	chr5	141973142	A	G	N/A	1	1
g.chr5:145493489T>A	Stomach-AdenoCA_ICGC	ENSG00000133706	LARS	chr5:145493414:-	0.402651	0.0716566	-2.16708	chr5	145493489	T	A	N/A	1	2
g.chr5:145493490T>G	ColoRect-AdenoCA_TCGA	ENSG00000133706	LARS	chr5:145493414:-	0.402651	0.0843094	-1.99075	chr5	145493490	T	G	N/A	1	2
g.chr5:14611185A>G	Skin-Melanoma_ICGC	ENSG00000145569	FAM105A	chr5:14611177:+	0.748538	0.31694	-1.8587	chr5	14611185	A	G	N/A	1	1
g.chr5:14616057A>C	ColoRect-AdenoCA_TCGA	ENSG00000145569	FAM105A	chr5:14616081:+	0.492543	0.100572	-2.16106	chr5	14616057	A	C	N/A	1	1
g.chr5:148874599T>C	Lymph-BNHL_ICGC	ENSG00000113712	CSNK1A1	chr5:148874575:-	0.480922	0.189532	-1.3767	chr5	148874599	T	C	N/A	1	1
g.chr5:149822999T>G	ColoRect-AdenoCA_TCGA	ENSG00000164587	RPS14	chr5:149822982:-	0.221843	0.0433208	-1.83987	chr5	149822999	T	G	N/A	1	1
g.chr5:151188166A>G	Liver-HCC_TCGA	ENSG00000145907	G3BP1	chr5:151188186:+	0.499429	0.136892	-1.83907	chr5	151188166	A	G	N/A	1	1
g.chr5:151190897A>C	ColoRect-AdenoCA_TCGA	ENSG00000145907	G3BP1	chr5:151190917:+	0.726366	0.223262	-2.22302	chr5	151190897	A	C	N/A	1	1
g.chr5:151771124T>G	ColoRect-AdenoCA_TCGA	ENSG00000132911	NMUR2	chr5:151771109:-	0.673401	0.182674	-2.22194	chr5	151771124	T	G	N/A	1	1
g.chr5:157214546T>C	Prost-AdenoCA_ICGC	ENSG00000113282	CLINT1	chr5:157214528:-	0.344349	0.146963	-1.11465	chr5	157214546	T	C	N/A	1	1
g.chr5:158712732A>C	ColoRect-AdenoCA_TCGA	ENSG00000164332	UBLCP1	chr5:158712745:+	0.301187	0.0803418	-1.59606	chr5	158712732	A	C	N/A	1	1
g.chr5:159502596T>A	Liver-HCC_ICGC	ENSG00000170234	PWWP2A	chr5:159502577:-	0.229251	0.0715818	-1.35009	chr5	159502596	T	A	fusion	1	1
g.chr5:161582512A>C	ColoRect-AdenoCA_TCGA	ENSG00000113327	GABRG2	chr5:161582528:+	0.602618	0.183102	-1.91185	chr5	161582512	A	C	N/A	2	2
g.chr5:161582512A>C	ColoRect-AdenoCA_TCGA	ENSG00000113327	GABRG2	chr5:161582528:+	0.602618	0.183102	-1.91185	chr5	161582512	A	C	N/A	2	2
g.chr5:169510361A>C	ColoRect-AdenoCA_TCGA	ENSG00000134516	DOCK2	chr5:169510383:+	0.746954	0.0297345	-4.56769	chr5	169510361	A	C	N/A	1	2
g.chr5:169510363A>C	ColoRect-AdenoCA_TCGA	ENSG00000134516	DOCK2	chr5:169510383:+	0.746954	0.0825386	-3.49078	chr5	169510363	A	C	N/A	1	2
g.chr5:170884597A>G	Panc-AdenoCA_ICGC	ENSG00000156427	FGF18	chr5:170884630:+	0.138823	0.0167559	-2.24701	chr5	170884597	A	G	N/A	1	1
g.chr5:171469096T>G	ColoRect-AdenoCA_TCGA	ENSG00000072786	STK10	chr5:171469083:-	0.823474	0.329788	-2.24921	chr5	171469096	T	G	N/A	1	1
g.chr5:171470646T>A	Lung-AdenoCA_TCGA	ENSG00000072786	STK10	chr5:171470623:-	0.747344	0.211186	-2.40228	chr5	171470646	T	A	N/A	1	1
g.chr5:176741207T>G	Panc-AdenoCA_ICGC	ENSG00000169223	MXD3	chr5:176741187:-	0.573083	0.127432	-2.2183	chr5	176741207	T	G	N/A	1	1
g.chr5:176910411T>C	Uterus-AdenoCA_TCGA	ENSG00000196923	PDLIM7	chr5:176910459:-	0.0519447	0.00948737	-1.74403	chr5	176910411	T	C	N/A	1	1
g.chr5:177572583T>G	ColoRect-AdenoCA_TCGA	ENSG00000145912	RMND5B	chr5:177572568:-	0.607398	0.121169	-2.41779	chr5	177572583	T	G	N/A	1	1
g.chr5:177579209A>C	ColoRect-AdenoCA_TCGA	ENSG00000145916	NHP2	chr5:177579241:+	0.303044	0.123461	-1.12722	chr5	177579209	A	C	N/A	1	1
g.chr5:179216515A>G	Liver-HCC_ICGC	ENSG00000161021	MAML1	chr5:179216537:+	0.664138	0.238427	-1.84311	chr5	179216515	A	G	N/A	1	1
g.chr5:2741986T>C	Breast-AdenoCa_ICGC	ENSG00000170561	IRX2	chr5:2741967:-	0.682131	0.330722	-1.4685	chr5	2741986	T	C	N/A	1	1
g.chr5:2755490A>C	ColoRect-AdenoCA_TCGA	ENSG00000186493	C5orf38	chr5:2755508:+	0.430449	0.0806091	-2.15408	chr5	2755490	A	C	N/A	1	1
g.chr5:32786830A>C	ColoRect-AdenoCA_TCGA	ENSG00000113389	NPR3	chr5:32786846:+	0.447224	0.15088	-1.51583	chr5	32786830	A	C	N/A	1	1
g.chr5:32791807A>T	Skin-Melanoma_ICGC	ENSG00000113389	NPR3	chr5:32791826:+	0.311517	0.107965	-1.31866	chr5	32791807	A	T	N/A	1	1
g.chr5:33523653T>G	ColoRect-AdenoCA_TCGA	ENSG00000151388	ADAMTS12	chr5:33523640:-	0.792504	0.2641	-2.36485	chr5	33523653	T	G	N/A	1	1
g.chr5:33944749T>C	Uterus-AdenoCA_TCGA	ENSG00000164175	SLC45A2	chr5:33944728:-	0.179655	0.0221733	-2.26776	chr5	33944749	T	C	N/A	1	1
g.chr5:34905904T>C	Kidney-ChRCC_TCGA	ENSG00000113456	RAD1	chr5:34905891:-	0.400532	0.0949584	-1.85129	chr5	34905904	T	C	N/A	1	1
g.chr5:34908681T>C	Head-SCC_TCGA	ENSG00000113456	RAD1	chr5:34908654:-	0.848281	0.364284	-2.278	chr5	34908681	T	C	N/A	1	1
g.chr5:35879688A>G	ColoRect-AdenoCA_TCGA	ENSG00000168685	IL7R	chr5:35879703:+	0.527387	0.0991149	-2.31676	chr5	35879688	A	G	oncogene	1	1
g.chr5:36100880T>A	Lung-SCC_TCGA	ENSG00000164187	LMBRD2	chr5:36100861:-	0.696561	0.279565	-1.7776	chr5	36100880	T	A	N/A	1	1
g.chr5:37065585A>T	ColoRect-AdenoCA_TCGA	ENSG00000164190	NIPBL	chr5:37065606:+	0.753099	0.109246	-3.21368	chr5	37065585	A	T	N/A	2	2
g.chr5:37065585A>T	Prost-AdenoCA_TCGA	ENSG00000164190	NIPBL	chr5:37065606:+	0.753099	0.109246	-3.21368	chr5	37065585	A	T	N/A	2	2
g.chr5:38478065T>G	Skin-Melanoma_TCGA	ENSG00000113594	LIFR	chr5:38478041:-	0.884075	0.175698	-3.57737	chr5	38478065	T	G	fusion	1	1
g.chr5:40714593T>G	ColoRect-AdenoCA_TCGA	ENSG00000113638	TTC33	chr5:40714577:-	0.719378	0.266595	-1.95335	chr5	40714593	T	G	N/A	1	1
g.chr5:40855437A>C	ColoRect-AdenoCA_TCGA	ENSG00000132357	CARD6	chr5:40855456:+	0.548166	0.117241	-2.21208	chr5	40855437	A	C	N/A	1	1
g.chr5:41307106A>G	Skin-Melanoma_ICGC	ENSG00000182836	PLCXD3	chr5:41307081:-	0.82258	0.604917	-1.10793	chr5	41307106	A	G	N/A	1	1
g.chr5:56218441T>C	Liver-HCC_ICGC	ENSG00000155545	MIER3	chr5:56218406:-	0.333316	0.0833381	-1.70461	chr5	56218441	T	C	N/A	1	1
g.chr5:6372056T>G	ColoRect-AdenoCA_TCGA	ENSG00000133398	MED10	chr5:6372012:-	0.536326	0.256595	-1.2093	chr5	6372056	T	G	N/A	1	1
g.chr5:65478297A>G	Liver-HCC_ICGC	ENSG00000153914	SREK1	chr5:65478319:+	0.89286	0.658878	-1.46199	chr5	65478297	A	G	N/A	1	1
g.chr5:663522T>A	Skin-Melanoma_ICGC	ENSG00000171368	TPPP	chr5:663503:-	0.174194	0.00299729	-4.25086	chr5	663522	T	A	N/A	1	1
g.chr5:71512118T>G	Panc-AdenoCA_ICGC	ENSG00000113048	MRPS27	chr5:71512093:-	0.609292	0.145718	-2.21292	chr5	71512118	T	G	N/A	1	1
g.chr5:71735748T>G	ColoRect-AdenoCA_TCGA	ENSG00000178175	ZNF366	chr5:71735730:-	0.426351	0.138978	-1.52705	chr5	71735748	T	G	N/A	1	1
g.chr5:72386330A>C	ColoRect-AdenoCA_TCGA	ENSG00000157107	FCHO2	chr5:72386349:+	0.854737	0.504749	-1.75326	chr5	72386330	A	C	N/A	1	1
g.chr5:76987069T>C	Lymph-BNHL_ICGC	ENSG00000171530	TBCA	chr5:76987001:-	0.944331	0.640216	-2.25475	chr5	76987069	T	C	N/A	1	1
g.chr5:77772783A>C	ColoRect-AdenoCA_TCGA	ENSG00000085365	SCAMP1	chr5:77772800:+	0.536818	0.159626	-1.80855	chr5	77772783	A	C	N/A	1	1
g.chr5:7831658T>A	Skin-Melanoma_ICGC	ENSG00000215217	C5orf49	chr5:7831631:-	0.612251	0.186119	-1.93221	chr5	7831658	T	A	N/A	1	1
g.chr5:81571898T>G	ColoRect-AdenoCA_TCGA	ENSG00000186468	RPS23	chr5:81571910:-	0.426993	0.0498342	-2.6538	chr5	81571898	T	G	N/A	1	1
g.chr5:82350859A>T	Head-SCC_TCGA	ENSG00000174695	TMEM167A	chr5:82350842:-	0.235582	0.0363908	-2.09932	chr5	82350859	A	T	N/A	1	1
g.chr5:86659101T>G	Liver-HCC_ICGC	ENSG00000134480	RASA1	chr5:86659084:-	0.656263	0.239853	-1.80017	chr5	86659101	T	G	N/A	1	1
g.chr5:86672577T>G	ColoRect-AdenoCA_TCGA	ENSG00000134480	RASA1	chr5:86672560:-	0.903341	0.452112	-2.42705	chr5	86672577	T	G	N/A	1	1
g.chr5:92953796T>C	Liver-HCC_ICGC	ENSG00000113391	FAM172A	chr5:92953775:-	0.852797	0.544862	-1.57678	chr5	92953796	T	C	N/A	1	1
g.chr5:96110365A>C	Liver-HCC_ICGC	ENSG00000153113	ERAP1	chr5:96110358:+	0.769795	0.484196	-1.27039	chr5	96110365	A	C	N/A	1	1
g.chr5:96254457A>G	ColoRect-AdenoCA_TCGA	ENSG00000164308	ERAP2	chr5:96254474:+	0.712519	0.131796	-2.79282	chr5	96254457	A	G	N/A	1	1
g.chr6:100951654T>G	ColoRect-AdenoCA_TCGA	ENSG00000112249	ASCC3	chr6:100951633:-	0.465447	0.0889843	-2.18767	chr6	100951654	T	G	N/A	1	1
g.chr6:10397115T>G	ColoRect-AdenoCA_TCGA	ENSG00000137203	TFAP2A	chr6:10397096:-	0.597573	0.242472	-1.53453	chr6	10397115	T	G	N/A	1	1
g.chr6:10629582A>T	Kidney-RCC_ICGC	ENSG00000111846	GCNT2	chr6:10629601:+	0.753083	0.334888	-1.80128	chr6	10629582	A	T	N/A	1	1
g.chr6:109814322T>C	Bone-Osteosarc_ICGC	ENSG00000155085	AK9	chr6:109814301:-	0.615057	0.322287	-1.2119	chr6	109814322	T	C	N/A	1	1
g.chr6:111291997A>C	Liver-HCC_ICGC	ENSG00000155115	GTF3C6	chr6:111292019:+	0.157945	0.0515462	-1.23876	chr6	111291997	A	C	N/A	1	1
g.chr6:111349449A>G	ColoRect-AdenoCA_TCGA	ENSG00000197498	RPF2	chr6:111349466:+	0.504451	0.129571	-1.92256	chr6	111349449	A	G	N/A	1	1
g.chr6:111601431A>G	Liver-HCC_ICGC	ENSG00000173214	RP5-1112D6.4	chr6:111601450:+	0.310272	0.133049	-1.07541	chr6	111601431	A	G	N/A	1	1
g.chr6:111620502T>C	Skin-Melanoma_TCGA	ENSG00000009413	REV3L	chr6:111620488:-	0.595509	0.222914	-1.63555	chr6	111620502	T	C	N/A	1	1
g.chr6:112392300T>C	Liver-HCC_TCGA	ENSG00000074935	TUBE1	chr6:112392281:-	0.540757	0.254664	-1.23728	chr6	112392300	T	C	N/A	1	1
g.chr6:114182962A>C	ColoRect-AdenoCA_TCGA	ENSG00000155130	MARCKS	chr6:114182985:+	0.662763	0.315523	-1.45006	chr6	114182962	A	C	N/A	1	1
g.chr6:114183997A>C	ColoRect-AdenoCA_TCGA	ENSG00000155130	MARCKS	chr6:114184083:+	0.735923	0.0710999	-3.5948	chr6	114183997	A	C	N/A	1	1
g.chr6:114257340T>G	Liver-HCC_ICGC	ENSG00000196591	HDAC2	chr6:114257320:-	0.44664	0.182124	-1.28776	chr6	114257340	T	G	N/A	1	1
g.chr6:116839245A>T	Biliary-AdenoCA_ICGC	ENSG00000178033	FAM26E	chr6:116839267:+	0.258213	0.0827104	-1.3508	chr6	116839245	A	T	N/A	1	1
g.chr6:11711871T>C	Lung-AdenoCA_TCGA	ENSG00000111863	ADTRP	chr6:11711854:-	0.698921	0.0143761	-5.06987	chr6	11711871	T	C	N/A	1	1
g.chr6:118031772A>C	ColoRect-AdenoCA_TCGA	ENSG00000153989	NUS1	chr6:118031796:+	0.936968	0.637471	-2.1346	chr6	118031772	A	C	N/A	1	1
g.chr6:118032309A>G	Skin-Melanoma_TCGA	ENSG00000153989	NUS1	chr6:118032329:+	0.790062	0.331042	-2.02877	chr6	118032309	A	G	N/A	1	1
g.chr6:118781951T>G	Uterus-AdenoCA_TCGA	ENSG00000111860	CEP85L	chr6:118781935:-	0.475507	0.128755	-1.81396	chr6	118781951	T	G	N/A	1	1
g.chr6:119281012T>G	ColoRect-AdenoCA_TCGA	ENSG00000111879	FAM184A	chr6:119280995:-	0.871408	0.409324	-2.28022	chr6	119281012	T	G	N/A	1	1
g.chr6:132617212A>G	Kidney-RCC_ICGC	ENSG00000079931	MOXD1	chr6:132617194:-	0.784999	0.277978	-2.24955	chr6	132617212	A	G	N/A	1	1
g.chr6:134309384A>C	Liver-HCC_ICGC	ENSG00000028839	TBPL1	chr6:134309403:+	0.434246	0.147776	-1.4876	chr6	134309384	A	C	N/A	1	1
g.chr6:134490409T>G	Liver-HCC_ICGC	ENSG00000118515	SGK1	chr6:134490394:-	0.945214	0.420373	-3.16921	chr6	134490409	T	G	oncogene	1	1
g.chr6:136579450T>G	Eso-AdenoCa_ICGC	ENSG00000029363	BCLAF1	chr6:136579432:-	0.843949	0.34325	-2.33675	chr6	136579450	T	G	other	1	1
g.chr6:136580050T>G	ColoRect-AdenoCA_TCGA	ENSG00000029363	BCLAF1	chr6:136580042:-	0.104175	0.0276415	-1.40873	chr6	136580050	T	G	other	1	1
g.chr6:137234724A>C	ColoRect-AdenoCA_TCGA	ENSG00000112357	PEX7	chr6:137234744:+	0.214065	0.0263051	-2.31074	chr6	137234724	A	C	N/A	1	1
g.chr6:138734570A>C	ColoRect-AdenoCA_TCGA	ENSG00000051620	HEBP2	chr6:138734648:+	0.384655	0.0901729	-1.84169	chr6	138734570	A	C	N/A	1	1
g.chr6:142765617T>C	Skin-Melanoma_ICGC	ENSG00000112414	GPR126	chr6:142765637:+	0.378109	0.065268	-2.16418	chr6	142765617	T	C	N/A	1	1
g.chr6:143814737T>G	ColoRect-AdenoCA_TCGA	ENSG00000001036	FUCA2	chr6:143814719:-	0.546783	0.120694	-2.17356	chr6	143814737	T	G	N/A	1	1
g.chr6:149916123T>C	Liver-HCC_ICGC	ENSG00000186625	KATNA1	chr6:149916104:-	0.699055	0.335312	-1.52706	chr6	149916123	T	C	N/A	1	1
g.chr6:151423324A>G	Uterus-AdenoCA_TCGA	ENSG00000120254	MTHFD1L	chr6:151423369:+	0.101561	0.0324278	-1.21578	chr6	151423324	A	G	N/A	1	2
g.chr6:151423326T>G	Liver-HCC_ICGC	ENSG00000120254	MTHFD1L	chr6:151423369:+	0.101561	0.0306995	-1.27233	chr6	151423326	T	G	N/A	1	2
g.chr6:152453011T>G	ColoRect-AdenoCA_TCGA	ENSG00000091831	SYNE1	chr6:152453036:+	0.804654	0.2088	-2.74781	chr6	152453011	T	G	both	1	1
g.chr6:158522342A>G	Panc-AdenoCA_ICGC	ENSG00000078269	SYNJ2	chr6:158522357:+	0.478771	0.114295	-1.96264	chr6	158522342	A	G	N/A	1	1
g.chr6:160873589A>C	ColoRect-AdenoCA_TCGA	ENSG00000146477	SLC22A3	chr6:160873609:+	0.775075	0.0093397	-5.90129	chr6	160873589	A	C	N/A	1	1
g.chr6:16305207T>C	Liver-HCC_ICGC	ENSG00000124788	ATXN1	chr6:16305187:-	0.219289	0.0814057	-1.15359	chr6	16305207	T	C	N/A	1	1
g.chr6:163993999A>C	ColoRect-AdenoCA_TCGA	ENSG00000112531	QKI	chr6:163994015:+	0.511951	0.0979679	-2.26782	chr6	163993999	A	C	both	1	1
g.chr6:163997794A>C	ColoRect-AdenoCA_TCGA	ENSG00000112531	QKI	chr6:163997819:+	0.49856	0.163055	-1.62991	chr6	163997794	A	C	both	1	1
g.chr6:165743955T>A	Panc-AdenoCA_ICGC	ENSG00000112541	PDE10A	chr6:165743931:-	0.441205	0.195691	-1.17718	chr6	165743955	T	A	N/A	1	1
g.chr6:165745692T>G	Skin-Melanoma_ICGC	ENSG00000112541	PDE10A	chr6:165745662:-	0.530922	0.225505	-1.35771	chr6	165745692	T	G	N/A	1	1
g.chr6:17293577A>T	Lymph-CLL_ICGC	ENSG00000112183	RBM24	chr6:17293598:+	0.457545	0.219345	-1.09926	chr6	17293577	A	T	N/A	1	1
g.chr6:17294084T>C	Eso-AdenoCa_ICGC	ENSG00000112183	RBM24	chr6:17294161:+	0.764506	0.348529	-1.80306	chr6	17294084	T	C	N/A	1	1
g.chr6:19840893A>G	ColoRect-AdenoCA_TCGA	ENSG00000172201	ID4	chr6:19840915:+	0.980075	0.0849801	-6.2722	chr6	19840893	A	G	N/A	1	1
g.chr6:19842410A>T	Uterus-AdenoCA_TCGA	ENSG00000172201	ID4	chr6:19842428:+	0.878679	0.0326241	-5.36952	chr6	19842410	A	T	N/A	1	1
g.chr6:24174535T>G	ColoRect-AdenoCA_TCGA	ENSG00000146038	DCDC2	chr6:24174522:-	0.348414	0.0731155	-1.91377	chr6	24174535	T	G	N/A	1	1
g.chr6:24650222T>C	ColoRect-AdenoCA_TCGA	ENSG00000111802	TDP2	chr6:24650207:-	0.795592	0.405937	-1.73975	chr6	24650222	T	C	N/A	1	1
g.chr6:26178467A>G	Eso-AdenoCa_ICGC	ENSG00000158373	NA	chr6:26178488:+	0.572662	0.123544	-2.25201	chr6	26178467	A	G	N/A	1	1
g.chr6:26188804T>C	ColoRect-AdenoCA_TCGA	ENSG00000188987	HIST1H4D	chr6:26188787:-	0.356617	0.0413477	-2.55343	chr6	26188804	T	C	N/A	1	1
g.chr6:27098439T>G	ColoRect-AdenoCA_TCGA	ENSG00000124635	HIST1H2BJ	chr6:27098424:-	0.274431	0.0645288	-1.70168	chr6	27098439	T	G	N/A	1	1
g.chr6:27777661A>C	Lymph-BNHL_ICGC	ENSG00000196747	HIST1H3H	chr6:27777681:+	0.307977	0.0922789	-1.47653	chr6	27777661	A	C	N/A	1	1
g.chr6:27798807T>G	Lymph-BNHL_ICGC	ENSG00000197914	HIST1H4K	chr6:27798792:-	0.276349	0.0524982	-1.93041	chr6	27798807	T	G	N/A	1	1
g.chr6:27821509A>C	ColoRect-AdenoCA_TCGA	ENSG00000233822	HIST1H2BN	chr6:27821533:+	0.864915	0.243528	-2.99016	chr6	27821509	A	C	N/A	1	1
g.chr6:28228716A>C	ColoRect-AdenoCA_TCGA	ENSG00000189134	NKAPL	chr6:28228736:+	0.856486	0.594519	-1.40372	chr6	28228716	A	C	N/A	1	1
g.chr6:28245776A>C	Liver-HCC_ICGC	ENSG00000197062	ZSCAN26	chr6:28245797:+	0.379482	0.128036	-1.42669	chr6	28245776	A	C	N/A	1	1
g.chr6:2887607T>C	Skin-Melanoma_TCGA	ENSG00000170542	SERPINB9	chr6:2887585:-	0.580399	0.29545	-1.19347	chr6	2887607	T	C	N/A	1	1
g.chr6:28962579T>G	ColoRect-AdenoCA_TCGA	ENSG00000197935	ZNF311	chr6:28962565:-	0.35272	0.0267545	-2.98683	chr6	28962579	T	G	N/A	1	1
g.chr6:29913629T>G	ColoRect-AdenoCA_TCGA	ENSG00000206503	HLA-A	chr6:29913647:+	0.612269	0.249587	-1.55768	chr6	29913629	T	G	fusion	1	1
g.chr6:30032655T>G	ColoRect-AdenoCA_TCGA	ENSG00000066379	ZNRD1	chr6:30032590:+	0.0925292	0.0295166	-1.2097	chr6	30032655	T	G	N/A	1	1
g.chr6:3019970A>C	ColoRect-AdenoCA_TCGA	ENSG00000124588	NQO2	chr6:3019989:+	0.380941	0.0945572	-1.77366	chr6	3019970	A	C	N/A	1	1
g.chr6:31785704A>C	ColoRect-AdenoCA_TCGA	ENSG00000204389	HSPA1A	chr6:31785719:+	0.929242	0.664248	-1.89282	chr6	31785704	A	C	N/A	1	1
g.chr6:32827577A>G	Thy-AdenoCA_TCGA	ENSG00000240065	PSMB9	chr6:32827596:+	0.40602	0.162257	-1.26108	chr6	32827577	A	G	N/A	1	1
g.chr6:33384200A>G	Lymph-BNHL_ICGC	N/A	PHF1	chr6:33384216:+	0.540377	0.250187	-1.25948	chr6	33384200	A	G	N/A	1	1
g.chr6:34254994T>C	Uterus-AdenoCA_TCGA	ENSG00000270800	NUDT3	chr6:34254928:-	0.517889	0.16241	-1.71199	chr6	34254994	T	C	N/A	1	1
g.chr6:351329A>T	Lung-AdenoCA_TCGA	ENSG00000112679	DUSP22	chr6:351355:+	0.699233	0.0788427	-3.30182	chr6	351329	A	T	N/A	1	2
g.chr6:351332A>G	Lung-SCC_TCGA	ENSG00000112679	DUSP22	chr6:351355:+	0.699233	0.041769	-3.97658	chr6	351332	A	G	N/A	1	2
g.chr6:35438542A>C	Uterus-AdenoCA_TCGA	ENSG00000198755	RPL10A	chr6:35438596:+	0.454892	0.0385096	-3.03666	chr6	35438542	A	C	N/A	1	1
g.chr6:35542464T>G	Liver-HCC_ICGC	ENSG00000096060	FKBP5	chr6:35542447:-	0.260301	0.0302486	-2.42319	chr6	35542464	T	G	N/A	1	1
g.chr6:36077710A>G	Liver-HCC_ICGC	ENSG00000112062	MAPK14	chr6:36077727:+	0.399491	0.190349	-1.04016	chr6	36077710	A	G	N/A	1	1
g.chr6:36199961A>C	ColoRect-AdenoCA_TCGA	ENSG00000096070	BRPF3	chr6:36199987:+	0.148877	0.0332051	-1.62784	chr6	36199961	A	C	N/A	1	1
g.chr6:37360175A>C	Breast-AdenoCa_TCGA	ENSG00000112130	RNF8	chr6:37360196:+	0.153095	0.0381972	-1.51552	chr6	37360175	A	C	N/A	1	1
g.chr6:38643916A>C	Panc-AdenoCA_ICGC	ENSG00000124767	GLO1	chr6:38643888:-	0.233828	0.0508332	-1.74021	chr6	38643916	A	C	N/A	1	1
g.chr6:39057713A>C	Skin-Melanoma_ICGC	ENSG00000112164	GLP1R	chr6:39057737:+	0.377983	0.115358	-1.53902	chr6	39057713	A	C	N/A	1	1
g.chr6:39873322A>G	Bone-Leiomyo_TCGA	ENSG00000124615	MOCS1	chr6:39873299:-	0.177935	0.0351605	-1.78164	chr6	39873322	A	G	N/A	1	1
g.chr6:41065669A>C	ColoRect-AdenoCA_TCGA	ENSG00000001167	NFYA	chr6:41065692:+	0.417847	0.170665	-1.2493	chr6	41065669	A	C	N/A	1	1
g.chr6:41126274A>G	Skin-Melanoma_ICGC	ENSG00000095970	TREM2	chr6:41126252:-	0.263581	0.0664363	-1.61533	chr6	41126274	A	G	N/A	1	1
g.chr6:41759015A>C	Liver-HCC_ICGC	ENSG00000214736	USP49	chr6:41759036:+	0.305777	0.0903147	-1.48986	chr6	41759015	A	C	N/A	1	1
g.chr6:42193006T>G	ColoRect-AdenoCA_TCGA	ENSG00000124496	TRERF1	chr6:42192975:-	0.465578	0.177849	-1.39308	chr6	42193006	T	G	N/A	1	1
g.chr6:42658999T>C	ColoRect-AdenoCA_TCGA	ENSG00000024048	UBR2	chr6:42659020:+	0.485418	0.0538754	-2.80736	chr6	42658999	T	C	N/A	1	1
g.chr6:43506464A>T	Skin-Melanoma_ICGC	ENSG00000171453	XPO5	chr6:43506486:+	0.863311	0.455912	-2.01988	chr6	43506464	A	T	N/A	1	1
g.chr6:46669010T>G	ColoRect-AdenoCA_TCGA	ENSG00000146070	TDRD6	chr6:46668990:-	0.728192	0.312289	-1.77491	chr6	46669010	T	G	N/A	1	1
g.chr6:49398096T>C	Liver-HCC_ICGC	ENSG00000146085	MUT	chr6:49398146:-	0.243875	0.0564881	-1.68403	chr6	49398096	T	C	N/A	1	1
g.chr6:4993300T>G	Liver-HCC_ICGC	ENSG00000124787	RPP40	chr6:4993273:-	0.194905	0.0517587	-1.48957	chr6	4993300	T	G	N/A	1	1
g.chr6:52128835T>C	Liver-HCC_ICGC	ENSG00000112118	MCM3	chr6:52128883:-	0.638253	0.0404276	-3.73476	chr6	52128835	T	C	N/A	1	1
g.chr6:52272557A>C	Uterus-AdenoCA_TCGA	ENSG00000170915	PAQR8	chr6:52272550:+	0.951552	0.843984	-1.28943	chr6	52272557	A	C	N/A	1	1
g.chr6:55300251T>C	ColoRect-AdenoCA_TCGA	ENSG00000146151	HMGCLL1	chr6:55300228:-	0.590155	0.291756	-1.25148	chr6	55300251	T	C	N/A	1	1
g.chr6:56892124A>C	ColoRect-AdenoCA_TCGA	ENSG00000151917	BEND6	chr6:56892144:+	0.916973	0.752375	-1.29059	chr6	56892124	A	C	N/A	1	2
g.chr6:56892125A>G	ColoRect-AdenoCA_TCGA	ENSG00000151917	BEND6	chr6:56892144:+	0.916973	0.713959	-1.48723	chr6	56892125	A	G	N/A	1	2
g.chr6:6144337T>G	ColoRect-AdenoCA_TCGA	ENSG00000124491	F13A1	chr6:6144317:-	0.666445	0.208003	-2.02916	chr6	6144337	T	G	N/A	1	1
g.chr6:64293261A>T	Liver-HCC_ICGC	ENSG00000112245	PTP4A1	chr6:64293282:+	0.525246	0.198765	-1.4951	chr6	64293261	A	T	N/A	1	1
g.chr6:70099253A>C	ColoRect-AdenoCA_TCGA	ENSG00000135298	BAI3	chr6:70099277:+	0.867227	0.582772	-1.5425	chr6	70099253	A	C	N/A	1	1
g.chr6:70925844T>C	ColoRect-AdenoCA_TCGA	ENSG00000112280	COL9A1	chr6:70925829:-	0.55102	0.189953	-1.65511	chr6	70925844	T	C	N/A	1	1
g.chr6:72015259A>C	ColoRect-AdenoCA_TCGA	ENSG00000119900	OGFRL1	chr6:72015283:+	0.577186	0.243707	-1.4437	chr6	72015259	A	C	N/A	1	2
g.chr6:72015261T>C	ColoRect-AdenoCA_TCGA	ENSG00000119900	OGFRL1	chr6:72015283:+	0.577186	0.237648	-1.47685	chr6	72015261	T	C	N/A	1	2
g.chr6:7252191A>C	ColoRect-AdenoCA_TCGA	ENSG00000124782	RREB1	chr6:7252213:+	0.707347	0.197022	-2.28755	chr6	7252191	A	C	N/A	1	1
g.chr6:73112489A>T	Prost-AdenoCA_TCGA	ENSG00000079841	RIMS1	chr6:73112508:+	0.928885	0.697615	-1.73371	chr6	73112489	A	T	N/A	1	1
g.chr6:7586789A>G	Skin-Melanoma_ICGC	ENSG00000096696	DSP	chr6:7586807:+	0.847423	0.192179	-3.15044	chr6	7586789	A	G	N/A	1	1
g.chr6:75964582T>C	Liver-HCC_ICGC	ENSG00000112697	TMEM30A	chr6:75964554:-	0.562815	0.18122	-1.7607	chr6	75964582	T	C	N/A	1	1
g.chr6:7612174A>G	Liver-HCC_ICGC	ENSG00000168566	SNRNP48	chr6:7612198:+	0.523623	0.00696643	-5.05422	chr6	7612174	A	G	N/A	1	1
g.chr6:78168904T>C	Liver-HCC_ICGC	ENSG00000135312	HTR1B	chr6:78168882:-	0.757251	0.500702	-1.13486	chr6	78168904	T	C	N/A	1	1
g.chr6:79612665A>G	ColoRect-AdenoCA_TCGA	ENSG00000146243	IRAK1BP1	chr6:79612681:+	0.455513	0.210874	-1.14124	chr6	79612665	A	G	N/A	1	1
g.chr6:79645609T>C	Ovary-AdenoCA_ICGC	ENSG00000146247	PHIP	chr6:79645588:-	0.935331	0.392838	-3.10701	chr6	79645609	T	C	N/A	1	1
g.chr6:83907157T>C	Liver-HCC_ICGC	ENSG00000013392	RWDD2A	chr6:83907177:+	0.496116	0.115014	-2.02499	chr6	83907157	T	C	N/A	1	1
g.chr6:83920139T>G	ColoRect-AdenoCA_TCGA	ENSG00000065833	ME1	chr6:83920108:-	0.661544	0.405776	-1.05164	chr6	83920139	T	G	N/A	1	1
g.chr6:84567217A>C	Breast-AdenoCa_ICGC	ENSG00000203877	RIPPLY2	chr6:84567234:+	0.83943	0.385932	-2.11843	chr6	84567217	A	C	N/A	1	1
g.chr6:86212443A>C	Liver-HCC_TCGA	ENSG00000135317	SNX14	chr6:86212419:-	0.596435	0.222371	-1.64254	chr6	86212443	A	C	N/A	1	1
g.chr6:90341932A>C	Liver-HCC_ICGC	ENSG00000135299	LYRM2	chr6:90341946:+	0.495485	0.110891	-2.06361	chr6	90341932	A	C	N/A	1	1
g.chr6:90636279T>G	Eso-AdenoCa_ICGC	ENSG00000112182	BACH2	chr6:90636247:-	0.590043	0.203324	-1.72979	chr6	90636279	T	G	N/A	1	1
g.chr6:97588609A>C	ColoRect-AdenoCA_TCGA	ENSG00000186231	KLHL32	chr6:97588627:+	0.911714	0.415511	-2.67598	chr6	97588609	A	C	N/A	1	1
g.chr6:97590192A>G	Liver-HCC_ICGC	ENSG00000146263	MMS22L	chr6:97590173:-	0.644148	0.200336	-1.97761	chr6	97590192	A	G	N/A	1	1
g.chr6:99286822A>C	Eso-AdenoCa_ICGC	ENSG00000184486	POU3F2	chr6:99286842:+	0.479164	0.250535	-1.01237	chr6	99286822	A	C	N/A	1	1
g.chr6:99846701T>C	Liver-HCC_ICGC	ENSG00000132424	PNISR	chr6:99846676:-	0.365947	0.159553	-1.11191	chr6	99846701	T	C	N/A	1	1
g.chr7:101202286A>G	Prost-AdenoCA_ICGC	ENSG00000160963	COL26A1	chr7:101202304:+	0.246638	0.0818035	-1.30147	chr7	101202286	A	G	N/A	1	1
g.chr7:104743306T>G	CNS-GBM_TCGA	ENSG00000135250	KMT2E	chr7:104743285:-	0.443093	0.139717	-1.58902	chr7	104743306	T	G	N/A	1	1
g.chr7:106834952T>G	Liver-HCC_ICGC	ENSG00000164597	HBP1	chr7:106834935:-	0.437654	0.142962	-1.54021	chr7	106834952	T	G	N/A	1	2
g.chr7:106834954A>G	Liver-HCC_ICGC	ENSG00000164597	HBP1	chr7:106834935:-	0.437654	0.112735	-1.81242	chr7	106834954	A	G	N/A	1	2
g.chr7:107260904A>G	ColoRect-AdenoCA_TCGA	ENSG00000075790	BCAP29	chr7:107260919:+	0.641291	0.245735	-1.70246	chr7	107260904	A	G	N/A	1	1
g.chr7:108199877A>C	ColoRect-AdenoCA_TCGA	ENSG00000177683	THAP5	chr7:108199849:-	0.39073	0.0847486	-1.93527	chr7	108199877	A	C	N/A	1	1
g.chr7:108213925A>C	ColoRect-AdenoCA_TCGA	ENSG00000128590	DNAJB9	chr7:108213940:+	0.184102	0.0435307	-1.60098	chr7	108213925	A	C	N/A	1	1
g.chr7:111984500A>G	Skin-Melanoma_TCGA	ENSG00000198839	ZNF277	chr7:111984503:+	0.25042	0.0345269	-2.23451	chr7	111984500	A	G	N/A	1	1
g.chr7:114662185A>C	Stomach-AdenoCA_TCGA	ENSG00000135272	MDFIC	chr7:114662201:+	0.49509	0.173582	-1.54081	chr7	114662185	A	C	N/A	1	1
g.chr7:117834139A>C	ColoRect-AdenoCA_TCGA	ENSG00000128534	NAA38	chr7:117834165:+	0.226456	0.0728363	-1.31548	chr7	117834139	A	C	N/A	1	1
g.chr7:120390364A>T	Skin-Melanoma_TCGA	ENSG00000184408	KCND2	chr7:120390391:+	0.445693	0.124452	-1.73284	chr7	120390364	A	T	N/A	1	1
g.chr7:123092263T>G	ColoRect-AdenoCA_TCGA	ENSG00000164675	IQUB	chr7:123092247:-	0.420992	0.198771	-1.07529	chr7	123092263	T	G	N/A	1	1
g.chr7:123318224T>G	ColoRect-AdenoCA_TCGA	ENSG00000106299	WASL	chr7:123318205:-	0.260409	0.0995104	-1.15883	chr7	123318224	T	G	N/A	1	1
g.chr7:124385165T>C	ColoRect-AdenoCA_TCGA	ENSG00000170775	GPR37	chr7:124385135:-	0.306416	0.0505213	-2.11659	chr7	124385165	T	C	N/A	1	1
g.chr7:127007820T>C	ColoRect-AdenoCA_TCGA	ENSG00000048405	ZNF800	chr7:127007803:-	0.548406	0.0468297	-3.20751	chr7	127007820	T	C	N/A	1	1
g.chr7:127231737A>C	Uterus-AdenoCA_TCGA	ENSG00000004059	ARF5	chr7:127231669:+	0.0613128	0.00714299	-2.20596	chr7	127231737	A	C	N/A	1	1
g.chr7:127667142T>G	ColoRect-AdenoCA_TCGA	ENSG00000128594	LRRC4	chr7:127667124:-	0.624716	0.267499	-1.51697	chr7	127667142	T	G	N/A	1	1
g.chr7:130148101A>C	ColoRect-AdenoCA_TCGA	ENSG00000106484	MEST	chr7:130148123:+	0.59421	0.249976	-1.48014	chr7	130148101	A	C	N/A	1	1
g.chr7:133975178T>C	Uterus-AdenoCA_TCGA	ENSG00000205060	SLC35B4	chr7:133975158:-	0.385937	0.157371	-1.2135	chr7	133975178	T	C	N/A	1	1
g.chr7:136912343A>G	ColoRect-AdenoCA_TCGA	ENSG00000105894	PTN	chr7:136912315:-	0.412642	0.203555	-1.01117	chr7	136912343	A	G	N/A	1	1
g.chr7:138728364T>A	Liver-HCC_ICGC	ENSG00000105939	ZC3HAV1	chr7:138728309:-	0.740815	0.408127	-1.42192	chr7	138728364	T	A	N/A	1	1
g.chr7:141353768A>G	Prost-AdenoCA_ICGC	ENSG00000006530	AGK	chr7:141353794:+	0.408084	0.0931957	-1.90334	chr7	141353768	A	G	N/A	1	1
g.chr7:141627330T>G	ColoRect-AdenoCA_TCGA	ENSG00000258227	CLEC5A	chr7:141627315:-	0.381044	0.0332124	-2.88593	chr7	141627330	T	G	N/A	1	2
g.chr7:141627334T>G	ColoRect-AdenoCA_TCGA	ENSG00000258227	CLEC5A	chr7:141627315:-	0.381044	0.0320413	-2.92304	chr7	141627334	T	G	N/A	1	2
g.chr7:142836814A>T	Lung-SCC_TCGA	ENSG00000159763	PIP	chr7:142836832:+	0.336883	0.149242	-1.06334	chr7	142836814	A	T	N/A	1	1
g.chr7:143004636A>G	Liver-HCC_ICGC	ENSG00000106144	CASP2	chr7:143004658:+	0.391479	0.03038	-3.02202	chr7	143004636	A	G	N/A	1	1
g.chr7:1468133T>C	Panc-AdenoCA_ICGC	ENSG00000164877	MICALL2	chr7:1468101:-	0.398685	0.140958	-1.39641	chr7	1468133	T	C	N/A	1	1
g.chr7:150041459T>G	ColoRect-AdenoCA_TCGA	ENSG00000127399	RARRES2	chr7:150041492:+	0.332244	0.150243	-1.03464	chr7	150041459	T	G	N/A	1	1
g.chr7:151067927T>G	ColoRect-AdenoCA_TCGA	ENSG00000187260	NUB1	chr7:151067904:-	0.240142	0.0934827	-1.11993	chr7	151067927	T	G	N/A	1	1
g.chr7:155100898T>G	Stomach-AdenoCA_TCGA	ENSG00000186480	INSIG1	chr7:155100925:+	0.359454	0.105819	-1.55644	chr7	155100898	T	G	N/A	1	1
g.chr7:20176038T>C	Liver-HCC_ICGC	ENSG00000183742	MACC1	chr7:20176020:-	0.973671	0.223884	-4.85358	chr7	20176038	T	C	oncogene	1	1
g.chr7:20455362A>T	Skin-Melanoma_ICGC	ENSG00000105855	ITGB8	chr7:20455377:+	0.695738	0.38976	-1.2754	chr7	20455362	A	T	N/A	1	1
g.chr7:2290763T>A	Ovary-AdenoCA_ICGC	ENSG00000106268	SNX8	chr7:2290719:+	0.191114	0.0106443	-3.08924	chr7	2290763	T	A	N/A	1	1
g.chr7:26228614A>T	Skin-Melanoma_ICGC	ENSG00000050344	NFE2L3	chr7:26228633:+	0.13641	0.0168148	-2.22311	chr7	26228614	A	T	N/A	1	1
g.chr7:26413556A>C	ColoRect-AdenoCA_TCGA	ENSG00000086300	SNX10	chr7:26413637:+	0.902994	0.762	-1.06726	chr7	26413556	A	C	N/A	1	1
g.chr7:26413930T>C	Uterus-AdenoCA_TCGA	ENSG00000086300	SNX10	chr7:26413945:+	0.606771	0.118111	-2.4442	chr7	26413930	T	C	N/A	1	1
g.chr7:27146651T>C	ColoRect-AdenoCA_TCGA	ENSG00000105997	HOXA3	chr7:27146629:-	0.600293	0.164663	-2.03062	chr7	27146651	T	C	N/A	1	1
g.chr7:27876644A>C	ColoRect-AdenoCA_TCGA	ENSG00000106052	JAZF1	chr7:27876670:+	0.36791	0.138072	-1.2902	chr7	27876644	A	C	N/A	1	1
g.chr7:28861785A>G	Skin-Melanoma_TCGA	ENSG00000146592	CREB5	chr7:28861801:+	0.422529	0.116327	-1.71528	chr7	28861785	A	G	N/A	1	1
g.chr7:29606541T>C	Uterus-AdenoCA_TCGA	ENSG00000176532	PRR15	chr7:29606565:+	0.209568	0.00970445	-3.29788	chr7	29606541	T	C	N/A	1	1
g.chr7:32904011T>G	ColoRect-AdenoCA_TCGA	ENSG00000170852	AVL9	chr7:32903995:-	0.584388	0.163575	-1.97268	chr7	32904011	T	G	N/A	1	1
g.chr7:33677264A>G	Liver-HCC_ICGC	ENSG00000122507	BBS9	chr7:33677285:+	0.671664	0.135718	-2.56704	chr7	33677264	A	G	N/A	1	1
g.chr7:34193635T>G	ColoRect-AdenoCA_TCGA	ENSG00000164619	BMPER	chr7:34193660:+	0.319052	0.119825	-1.23595	chr7	34193635	T	G	N/A	1	1
g.chr7:38269641A>C	Uterus-AdenoCA_TCGA	ENSG00000010270	STARD3NL	chr7:38269665:+	0.526482	0.141763	-1.90675	chr7	38269641	A	C	N/A	1	1
g.chr7:38269996A>C	ColoRect-AdenoCA_TCGA	ENSG00000010270	STARD3NL	chr7:38270011:+	0.838598	0.26743	-2.65553	chr7	38269996	A	C	N/A	1	1
g.chr7:41727061T>G	ColoRect-AdenoCA_TCGA	ENSG00000122641	INHBA	chr7:41727035:-	0.320465	0.115757	-1.28161	chr7	41727061	T	G	N/A	1	1
g.chr7:42957027T>C	Panc-AdenoCA_ICGC	ENSG00000106588	PSMA2	chr7:42957011:-	0.475112	0.131501	-1.78812	chr7	42957027	T	C	N/A	1	1
g.chr7:44109163T>C	Prost-AdenoCA_ICGC	ENSG00000136279	POLM	chr7:44109179:+	0.192208	0.0444282	-1.63271	chr7	44109163	T	C	N/A	1	1
g.chr7:63977051T>C	ColoRect-AdenoCA_TCGA	ENSG00000173041	ZNF680	chr7:63977033:-	0.271016	0.0872767	-1.35787	chr7	63977051	T	C	N/A	1	1
g.chr7:64431054T>G	ColoRect-AdenoCA_TCGA	N/A	ZNF117	chr7:64431037:-	0.783916	0.193502	-2.71605	chr7	64431054	T	G	N/A	1	1
g.chr7:65557924A>G	Bladder-TCC_TCGA	ENSG00000126522	ASL	chr7:65557941:+	0.0876203	0.0106425	-2.18916	chr7	65557924	A	G	N/A	1	1
g.chr7:65558148A>G	Stomach-AdenoCA_TCGA	ENSG00000126522	ASL	chr7:65558163:+	0.0426482	0.00386982	-2.43948	chr7	65558148	A	G	N/A	1	1
g.chr7:65625251A>T	Skin-Melanoma_TCGA	ENSG00000241258	RP5-1132H15.1	chr7:65625275:+	0.436653	0.170487	-1.32742	chr7	65625251	A	T	N/A	1	1
g.chr7:73280199A>T	Lymph-BNHL_ICGC	ENSG00000175877	WBSCR28	chr7:73280220:+	0.0725359	0.0198953	-1.34881	chr7	73280199	A	T	N/A	1	1
g.chr7:75956133T>C	Liver-HCC_ICGC	ENSG00000170027	YWHAG	chr7:75956116:-	0.544065	0.248946	-1.28096	chr7	75956133	T	C	N/A	1	1
g.chr7:77586643A>T	Biliary-AdenoCA_ICGC	ENSG00000006576	PHTF2	chr7:77586661:+	0.752996	0.158173	-2.78654	chr7	77586643	A	T	N/A	1	1
g.chr7:79852720A>C	Liver-HCC_ICGC	ENSG00000127955	GNAI1	chr7:79852738:+	0.791608	0.287785	-2.24081	chr7	79852720	A	C	N/A	1	1
g.chr7:86509348A>G	Liver-HCC_ICGC	ENSG00000164659	KIAA1324L	chr7:86509331:-	0.688888	0.140341	-2.60739	chr7	86509348	A	G	N/A	1	1
g.chr7:87133200T>G	Prost-AdenoCA_ICGC	ENSG00000085563	ABCB1	chr7:87133174:-	0.518248	0.265182	-1.09223	chr7	87133200	T	G	N/A	1	1
g.chr7:87464241T>G	ColoRect-AdenoCA_TCGA	ENSG00000075303	SLC25A40	chr7:87464220:-	0.451593	0.166771	-1.41445	chr7	87464241	T	G	N/A	1	1
g.chr7:87903931A>T	ColoRect-AdenoCA_TCGA	ENSG00000127954	STEAP4	chr7:87903913:-	0.582765	0.00416519	-5.81095	chr7	87903931	A	T	N/A	1	1
g.chr7:89794122A>G	Panc-Endocrine_ICGC	ENSG00000164647	STEAP1	chr7:89794141:+	0.678384	0.205441	-2.09899	chr7	89794122	A	G	N/A	1	1
g.chr7:90045221A>C	ColoRect-AdenoCA_TCGA	ENSG00000157224	CLDN12	chr7:90045241:+	0.858491	0.642419	-1.21693	chr7	90045221	A	C	N/A	1	1
g.chr7:92116358T>C	ColoRect-AdenoCA_TCGA	ENSG00000127980	PEX1	chr7:92116339:-	0.807589	0.151241	-3.15932	chr7	92116358	T	C	N/A	1	1
g.chr7:92728843T>G	ColoRect-AdenoCA_TCGA	ENSG00000205413	SAMD9	chr7:92728831:-	0.470163	0.0990652	-2.08816	chr7	92728843	T	G	N/A	1	1
g.chr7:94060514A>G	ColoRect-AdenoCA_TCGA	ENSG00000164692	COL1A2	chr7:94060539:+	0.772939	0.549921	-1.02463	chr7	94060514	A	G	N/A	1	1
g.chr7:97837640A>G	Lung-SCC_TCGA	ENSG00000164715	LMTK2	chr7:97837668:+	0.681539	0.225815	-1.99295	chr7	97837640	A	G	N/A	1	1
g.chr7:99564376T>C	Liver-HCC_ICGC	ENSG00000160862	AZGP1	chr7:99564353:-	0.44759	0.0579776	-2.57756	chr7	99564376	T	C	N/A	1	1
g.chr7:99680753A>G	Uterus-AdenoCA_TCGA	ENSG00000166529	ZNF3	chr7:99680770:+	0.718311	0.147653	-2.68923	chr7	99680753	A	G	N/A	1	1
g.chr7:99723108A>C	ColoRect-AdenoCA_TCGA	ENSG00000166997	CNPY4	chr7:99723131:+	0.206107	0.0389989	-1.85589	chr7	99723108	A	C	N/A	1	1
g.chr7:99798303T>G	ColoRect-AdenoCA_TCGA	ENSG00000160844	GATS	chr7:99798276:-	0.239571	0.0662874	-1.49014	chr7	99798303	T	G	N/A	1	1
g.chr8:100885248A>C	Liver-HCC_ICGC	ENSG00000164919	VPS13B	chr8:100885227:-	0.172957	0.0139438	-2.69386	chr8	100885248	A	C	fusion	1	1
g.chr8:100967707T>C	Lung-SCC_TCGA	ENSG00000132554	RGS22	chr8:100967688:-	0.746306	0.412012	-1.43466	chr8	100967707	T	C	N/A	1	1
g.chr8:101266258T>C	Ovary-AdenoCA_ICGC	ENSG00000034677	RNF19A	chr8:101266240:-	0.655537	0.198538	-2.03893	chr8	101266258	T	C	N/A	1	1
g.chr8:103218144A>T	Biliary-AdenoCA_ICGC	ENSG00000048392	RRM2B	chr8:103218121:-	0.20272	0.00719796	-3.55735	chr8	103218144	A	T	N/A	1	1
g.chr8:104410897T>C	CNS-Medullo_ICGC	ENSG00000164933	SLC25A32	chr8:104410820:-	0.286964	0.105104	-1.23158	chr8	104410897	T	C	N/A	1	1
g.chr8:109206387T>A	Thy-AdenoCA_TCGA	ENSG00000104408	EIF3E	chr8:109206366:-	0.530948	0.180189	-1.63902	chr8	109206387	T	A	tsg	1	1
g.chr8:113235180T>G	ColoRect-AdenoCA_TCGA	ENSG00000164796	CSMD3	chr8:113235157:-	0.645619	0.29102	-1.49028	chr8	113235180	T	G	tsg	1	1
g.chr8:117956220A>C	ColoRect-AdenoCA_TCGA	ENSG00000205002	AARD	chr8:117956239:+	0.763459	0.409284	-1.53866	chr8	117956220	A	C	N/A	1	1
g.chr8:117956957A>C	ColoRect-AdenoCA_TCGA	ENSG00000205002	AARD	chr8:117956974:+	0.69462	0.270106	-1.81589	chr8	117956957	A	C	N/A	1	1
g.chr8:121384260A>C	ColoRect-AdenoCA_TCGA	ENSG00000187955	COL14A1	chr8:121384273:+	0.726762	0.276604	-1.93963	chr8	121384260	A	C	N/A	1	1
g.chr8:124024192T>G	ColoRect-AdenoCA_TCGA	ENSG00000136986	DERL1	chr8:124024172:-	0.24583	0.0395382	-2.06917	chr8	124024192	T	G	N/A	1	1
g.chr8:124466580A>C	ColoRect-AdenoCA_TCGA	ENSG00000156795	NA	chr8:124466594:+	0.315253	0.109142	-1.32386	chr8	124466580	A	C	N/A	1	1
g.chr8:124475595T>A	ColoRect-AdenoCA_TCGA	ENSG00000156795	NA	chr8:124475614:+	0.864483	0.14866	-3.59818	chr8	124475595	T	A	N/A	1	1
g.chr8:124475815A>G	Liver-HCC_ICGC	ENSG00000156795	NA	chr8:124475833:+	0.20211	0.0540698	-1.48874	chr8	124475815	A	G	N/A	1	1
g.chr8:126449650A>C	ColoRect-AdenoCA_TCGA	ENSG00000173334	TRIB1	chr8:126449668:+	0.275649	0.0817495	-1.45266	chr8	126449650	A	C	N/A	1	1
g.chr8:128753640A>C	ColoRect-AdenoCA_TCGA	ENSG00000136997	MYC	chr8:128753674:+	0.78357	0.54155	-1.12001	chr8	128753640	A	C	oncogene	1	1
g.chr8:134249433T>G	ColoRect-AdenoCA_TCGA	ENSG00000104419	NDRG1	chr8:134249418:-	0.909673	0.462806	-2.4587	chr8	134249433	T	G	tsg	1	1
g.chr8:142204330T>G	Skin-Melanoma_ICGC	ENSG00000105339	DENND3	chr8:142204347:+	0.0881724	0.00414843	-3.14471	chr8	142204330	T	G	N/A	1	1
g.chr8:144103809A>C	ColoRect-AdenoCA_TCGA	ENSG00000160932	LY6E	chr8:144103800:+	0.194674	0.0248369	-2.25035	chr8	144103809	A	C	N/A	1	1
g.chr8:144738566A>G	ColoRect-AdenoCA_TCGA	ENSG00000183309	ZNF623	chr8:144738589:+	0.937835	0.139654	-4.53195	chr8	144738566	A	G	N/A	1	1
g.chr8:145067562A>G	Liver-HCC_ICGC	ENSG00000178719	GRINA	chr8:145067485:+	0.137237	0.0289203	-1.67544	chr8	145067562	A	G	N/A	1	1
g.chr8:146066735T>C	Breast-AdenoCa_TCGA	ENSG00000170619	ZNF7	chr8:146066690:-	0.136265	0.0148088	-2.35095	chr8	146066735	T	C	N/A	1	1
g.chr8:17161629A>G	ColoRect-AdenoCA_TCGA	ENSG00000155975	MTMR7	chr8:17161645:+	0.436756	0.123279	-1.70739	chr8	17161629	A	G	N/A	1	1
g.chr8:17501543T>G	ColoRect-AdenoCA_TCGA	ENSG00000129422	MTUS1	chr8:17501527:-	0.219658	0.0902231	-1.04325	chr8	17501543	T	G	N/A	1	1
g.chr8:1906069A>G	Eso-AdenoCa_ICGC	ENSG00000104728	ARHGEF10	chr8:1906083:+	0.37895	0.100983	-1.69234	chr8	1906069	A	G	tsg	1	1
g.chr8:19259360A>C	ColoRect-AdenoCA_TCGA	ENSG00000104611	CSGALNACT1	chr8:19259381:+	0.298921	0.0320553	-2.55527	chr8	19259360	A	C	N/A	1	1
g.chr8:20002386T>G	ColoRect-AdenoCA_TCGA	ENSG00000036565	SLC18A1	chr8:20002370:-	0.715359	0.309521	-1.72391	chr8	20002386	T	G	N/A	1	1
g.chr8:21963279T>G	Uterus-AdenoCA_TCGA	ENSG00000173566	FAM160B2	chr8:21963252:-	0.280087	0.124662	-1.00498	chr8	21963279	T	G	N/A	1	1
g.chr8:23122216A>C	ColoRect-AdenoCA_TCGA	ENSG00000147457	CHMP7	chr8:23122241:+	0.871027	0.221365	-3.1678	chr8	23122216	A	C	N/A	2	2
g.chr8:23122216A>C	ColoRect-AdenoCA_TCGA	ENSG00000147457	CHMP7	chr8:23122241:+	0.871027	0.221365	-3.1678	chr8	23122216	A	C	N/A	2	2
g.chr8:24810220T>G	ColoRect-AdenoCA_TCGA	ENSG00000104725	NEFL	chr8:24810196:-	0.113941	0.0398513	-1.13083	chr8	24810220	T	G	N/A	1	1
g.chr8:27534266A>C	ColoRect-AdenoCA_TCGA	ENSG00000168077	SCARA3	chr8:27534288:+	0.635598	0.200875	-1.93715	chr8	27534266	A	C	N/A	1	1
g.chr8:27662401A>C	ColoRect-AdenoCA_TCGA	ENSG00000171320	ESCO2	chr8:27662425:+	0.699673	0.239714	-1.99999	chr8	27662401	A	C	N/A	1	1
g.chr8:30041034A>G	Liver-HCC_ICGC	ENSG00000104671	DCTN6	chr8:30041054:+	0.75481	0.327946	-1.84193	chr8	30041034	A	G	N/A	1	1
g.chr8:38001189A>T	Head-SCC_TCGA	ENSG00000147465	STAR	chr8:38001167:-	0.393078	0.0634275	-2.25794	chr8	38001189	A	T	N/A	1	1
g.chr8:38140852A>C	Kidney-RCC_ICGC	ENSG00000085788	WHSC1L1	chr8:38140875:+	0.672412	0.28476	-1.64008	chr8	38140852	A	C	N/A	1	1
g.chr8:41407383A>C	Stomach-AdenoCA_ICGC	ENSG00000147536	RP11-360L9.4	chr8:41407396:+	0.436839	0.216345	-1.0331	chr8	41407383	A	C	N/A	2	2
g.chr8:41407383A>C	Stomach-AdenoCA_ICGC	ENSG00000147536	RP11-360L9.4	chr8:41407396:+	0.436839	0.216345	-1.0331	chr8	41407383	A	C	N/A	2	2
g.chr8:41789143T>C	ColoRect-AdenoCA_TCGA	ENSG00000083168	KAT6A	chr8:41789128:-	0.172309	0.0336732	-1.78745	chr8	41789143	T	C	oncogene	1	1
g.chr8:42032784T>G	ColoRect-AdenoCA_TCGA	ENSG00000104368	PLAT	chr8:42032751:-	0.512875	0.0698302	-2.64081	chr8	42032784	T	G	N/A	1	1
g.chr8:42687927T>G	ColoRect-AdenoCA_TCGA	ENSG00000131931	THAP1	chr8:42687912:-	0.652173	0.0826688	-3.03523	chr8	42687927	T	G	N/A	1	1
g.chr8:42986790A>G	Lymph-CLL_ICGC	ENSG00000185900	NA	chr8:42986814:+	0.298589	0.0114886	-3.60082	chr8	42986790	A	G	N/A	1	1
g.chr8:42990955A>C	ColoRect-AdenoCA_TCGA	ENSG00000185900	NA	chr8:42990980:+	0.737312	0.243356	-2.16641	chr8	42990955	A	C	N/A	1	1
g.chr8:48974371A>G	Lung-SCC_TCGA	ENSG00000169139	UBE2V2	chr8:48974454:+	0.580846	0.311205	-1.12074	chr8	48974371	A	G	N/A	1	1
g.chr8:59492084T>C	Skin-Melanoma_TCGA	ENSG00000035681	SDCBP	chr8:59492058:-	0.676822	0.162474	-2.37913	chr8	59492084	T	C	N/A	1	1
g.chr8:61533476A>G	Liver-HCC_ICGC	ENSG00000104388	RAB2A	chr8:61533500:+	0.443786	0.141378	-1.57808	chr8	61533476	A	G	N/A	1	1
g.chr8:61535629A>T	Liver-HCC_TCGA	ENSG00000104388	RAB2A	chr8:61535718:+	0.525747	0.209944	-1.42834	chr8	61535629	A	T	N/A	1	1
g.chr8:67858757A>G	Stomach-AdenoCA_TCGA	ENSG00000261787	TCF24	chr8:67858736:-	0.613222	0.0990478	-2.66873	chr8	67858757	A	G	N/A	1	1
g.chr8:68108476A>C	Prost-AdenoCA_ICGC	ENSG00000104218	ARFGEF1	chr8:68108498:+	0.716711	0.279553	-1.87489	chr8	68108476	A	C	N/A	1	1
g.chr8:68108872T>C	Kidney-RCC_ICGC	ENSG00000066777	ARFGEF1	chr8:68108851:-	0.335547	0.145968	-1.08337	chr8	68108872	T	C	N/A	1	1
g.chr8:6912845T>A	Skin-Melanoma_TCGA	ENSG00000164816	DEFA5	chr8:6912826:-	0.851584	0.6662	-1.05603	chr8	6912845	T	A	N/A	1	1
g.chr8:69149243A>T	Skin-Melanoma_ICGC	ENSG00000046889	PREX2	chr8:69149267:+	0.787811	0.485594	-1.36942	chr8	69149243	A	T	oncogene	1	1
g.chr8:72109695T>C	ColoRect-AdenoCA_TCGA	ENSG00000104313	EYA1	chr8:72109668:-	0.8371	0.248168	-2.74522	chr8	72109695	T	C	N/A	1	1
g.chr8:73964511T>G	Breast-AdenoCa_ICGC	ENSG00000147601	RP11-531A24.5	chr8:73964533:+	0.297384	0.0590251	-1.90917	chr8	73964511	T	G	N/A	1	1
g.chr8:73974483A>G	ColoRect-AdenoCA_TCGA	ENSG00000147601	SBSPON	chr8:73974498:+	0.721614	0.240069	-2.10478	chr8	73974483	A	G	N/A	1	1
g.chr8:74333428T>G	ColoRect-AdenoCA_TCGA	ENSG00000040341	STAU2	chr8:74333405:-	0.430284	0.130503	-1.61583	chr8	74333428	T	G	N/A	1	1
g.chr8:75146957T>G	ColoRect-AdenoCA_TCGA	ENSG00000104369	JPH1	chr8:75146939:-	0.943225	0.64572	-2.20993	chr8	75146957	T	G	N/A	1	1
g.chr8:75147361T>C	Stomach-AdenoCA_TCGA	ENSG00000104369	JPH1	chr8:75147346:-	0.625109	0.240263	-1.66253	chr8	75147361	T	C	N/A	1	1
g.chr8:79519072A>C	ColoRect-AdenoCA_TCGA	ENSG00000171033	PKIA	chr8:79519093:+	0.817926	0.208987	-2.8334	chr8	79519072	A	C	N/A	1	2
g.chr8:79519073A>C	ColoRect-AdenoCA_TCGA	ENSG00000171033	PKIA	chr8:79519093:+	0.817926	0.153688	-3.20832	chr8	79519073	A	C	N/A	1	2
g.chr8:79644109T>G	ColoRect-AdenoCA_TCGA	ENSG00000104432	IL7	chr8:79644085:-	0.575544	0.202833	-1.67319	chr8	79644109	T	G	N/A	1	1
g.chr8:85833699A>G	ColoRect-AdenoCA_TCGA	ENSG00000184672	RALYL	chr8:85833722:+	0.470605	0.0864151	-2.2405	chr8	85833699	A	G	N/A	1	1
g.chr8:86126758T>A	Skin-Melanoma_ICGC	ENSG00000176731	E2F5	chr8:86126709:-	0.680308	0.437639	-1.00594	chr8	86126758	T	A	N/A	1	1
g.chr8:86196175A>C	Eso-AdenoCa_ICGC	ENSG00000185015	CA13	chr8:86196191:+	0.624217	0.346509	-1.14191	chr8	86196175	A	C	N/A	1	1
g.chr8:91968411T>G	ColoRect-AdenoCA_TCGA	ENSG00000253250	NECAB1	chr8:91968385:-	0.263836	0.0587793	-1.74726	chr8	91968411	T	G	N/A	1	1
g.chr8:91970722T>G	ColoRect-AdenoCA_TCGA	ENSG00000253250	NECAB1	chr8:91970699:-	0.582357	0.190782	-1.77739	chr8	91970722	T	G	N/A	1	1
g.chr8:92006056T>G	ColoRect-AdenoCA_TCGA	ENSG00000155099	TMEM55A	chr8:92006043:-	0.430977	0.19667	-1.12937	chr8	92006056	T	G	N/A	1	1
g.chr8:92410354A>C	ColoRect-AdenoCA_TCGA	ENSG00000147606	SLC26A7	chr8:92410383:+	0.882485	0.477201	-2.10744	chr8	92410354	A	C	N/A	1	1
g.chr8:94727623A>C	Liver-HCC_ICGC	ENSG00000183808	FAM92A1	chr8:94727606:-	0.853397	0.661387	-1.09202	chr8	94727623	A	C	N/A	1	1
g.chr8:94743519T>G	Head-SCC_TCGA	ENSG00000183808	RBM12B	chr8:94743502:-	0.263323	0.0778989	-1.44248	chr8	94743519	T	G	N/A	1	1
g.chr8:96257206T>C	ColoRect-AdenoCA_TCGA	ENSG00000156172	C8orf37	chr8:96257192:-	0.207079	0.0807288	-1.08986	chr8	96257206	T	C	N/A	1	1
g.chr8:97347534A>G	ColoRect-AdenoCA_TCGA	ENSG00000156471	PTDSS1	chr8:97347549:+	0.372571	0.0628212	-2.18138	chr8	97347534	A	G	N/A	1	1
g.chr8:98155710A>C	ColoRect-AdenoCA_TCGA	ENSG00000104324	CPQ	chr8:98155729:+	0.831176	0.61009	-1.14629	chr8	98155710	A	C	N/A	1	1
g.chr9:100437217T>C	ColoRect-AdenoCA_TCGA	ENSG00000136936	XPA	chr9:100437191:-	0.423577	0.0898719	-2.0071	chr9	100437217	T	C	tsg	1	1
g.chr9:100445185A>T	Bladder-TCC_TCGA	ENSG00000136937	XPA	chr9:100445204:+	0.423305	0.186455	-1.16399	chr9	100445185	A	T	N/A	1	1
g.chr9:102731589A>G	Liver-HCC_ICGC	ENSG00000136874	STX17	chr9:102731605:+	0.152581	0.0396943	-1.47154	chr9	102731589	A	G	N/A	1	1
g.chr9:103350779A>G	ColoRect-AdenoCA_TCGA	ENSG00000170681	MURC	chr9:103350801:+	0.301824	0.131758	-1.04688	chr9	103350779	A	G	N/A	1	1
g.chr9:104172915A>G	Eso-AdenoCa_ICGC	ENSG00000136870	ZNF189	chr9:104172936:+	0.488801	0.202465	-1.32616	chr9	104172915	A	G	N/A	1	1
g.chr9:104234148T>G	ColoRect-AdenoCA_TCGA	ENSG00000165152	TMEM246	chr9:104234133:-	0.692295	0.226754	-2.0376	chr9	104234148	T	G	N/A	1	1
g.chr9:104329915A>C	ColoRect-AdenoCA_TCGA	ENSG00000155827	GRIN3A	chr9:104329932:+	0.626061	0.219367	-1.78471	chr9	104329915	A	C	N/A	1	1
g.chr9:104332758A>C	ColoRect-AdenoCA_TCGA	ENSG00000155827	GRIN3A	chr9:104332778:+	0.697981	0.220326	-2.10147	chr9	104332758	A	C	N/A	1	1
g.chr9:107540030A>C	ColoRect-AdenoCA_TCGA	ENSG00000165028	NIPSNAP3B	chr9:107540045:+	0.575344	0.171622	-1.87786	chr9	107540030	A	C	N/A	1	1
g.chr9:108309660A>C	ColoRect-AdenoCA_TCGA	ENSG00000106701	FSD1L	chr9:108309682:+	0.301998	0.0889845	-1.4883	chr9	108309660	A	C	N/A	1	1
g.chr9:108313024A>T	ColoRect-AdenoCA_TCGA	ENSG00000106701	FSD1L	chr9:108313044:+	0.575536	0.26173	-1.34147	chr9	108313024	A	T	N/A	1	1
g.chr9:111778278T>G	ColoRect-AdenoCA_TCGA	ENSG00000106771	CTNNAL1	chr9:111778261:-	0.266979	0.0785688	-1.45195	chr9	111778278	T	G	N/A	1	1
g.chr9:111892593T>G	ColoRect-AdenoCA_TCGA	ENSG00000260230	FRRS1L	chr9:111892573:-	0.686768	0.249529	-1.88618	chr9	111892593	T	G	N/A	1	1
g.chr9:112140536T>C	Lung-SCC_TCGA	ENSG00000070159	PTPN3	chr9:112140568:-	0.404316	0.0776791	-2.08679	chr9	112140536	T	C	N/A	1	1
g.chr9:112713736A>G	Lung-SCC_TCGA	ENSG00000243444	PALM2	chr9:112713752:+	0.938303	0.377222	-3.22319	chr9	112713736	A	G	N/A	1	1
g.chr9:113636599T>G	ColoRect-AdenoCA_TCGA	ENSG00000198121	LPAR1	chr9:113636585:-	0.530136	0.100486	-2.31253	chr9	113636599	T	G	N/A	1	1
g.chr9:114432489A>C	ColoRect-AdenoCA_TCGA	ENSG00000242616	GNG10	chr9:114432461:+	0.200227	0.0441365	-1.69045	chr9	114432489	A	C	N/A	1	1
g.chr9:120477211A>G	Stomach-AdenoCA_TCGA	ENSG00000136869	TLR4	chr9:120477230:+	0.299913	0.131284	-1.04194	chr9	120477211	A	G	N/A	1	1
g.chr9:124547786T>G	Lymph-BNHL_ICGC	ENSG00000136848	DAB2IP	chr9:124547809:+	0.664148	0.143814	-2.4658	chr9	124547786	T	G	N/A	1	1
g.chr9:125087345A>G	Panc-AdenoCA_ICGC	ENSG00000148187	MRRF	chr9:125087365:+	0.332125	0.151181	-1.02678	chr9	125087345	A	G	N/A	1	1
g.chr9:127639671A>C	ColoRect-AdenoCA_TCGA	ENSG00000136950	ARPC5L	chr9:127639694:+	0.742474	0.22111	-2.31808	chr9	127639671	A	C	N/A	1	1
g.chr9:12827068A>C	ColoRect-AdenoCA_TCGA	ENSG00000153714	LURAP1L	chr9:12827083:+	0.583942	0.229155	-1.55206	chr9	12827068	A	C	N/A	1	1
g.chr9:129645098A>C	ColoRect-AdenoCA_TCGA	ENSG00000177125	ZBTB34	chr9:129645111:+	0.216681	0.0281765	-2.25557	chr9	129645098	A	C	N/A	1	1
g.chr9:132646626T>G	ColoRect-AdenoCA_TCGA	ENSG00000187239	FNBP1	chr9:132646607:-	0.384711	0.163931	-1.15966	chr9	132646626	T	G	fusion	1	1
g.chr9:134399168A>T	Lung-SCC_TCGA	ENSG00000130714	POMT1	chr9:134399185:+	0.569239	0.0122812	-4.66608	chr9	134399168	A	T	N/A	1	1
g.chr9:135766757T>G	ColoRect-AdenoCA_TCGA	ENSG00000165699	TSC1	chr9:135766736:-	0.677906	0.200233	-2.12901	chr9	135766757	T	G	tsg	1	1
g.chr9:136239660A>C	ColoRect-AdenoCA_TCGA	ENSG00000148291	SURF4	chr9:136239677:+	0.356372	0.0467313	-2.42434	chr9	136239660	A	C	N/A	1	1
g.chr9:136324490A>C	ColoRect-AdenoCA_TCGA	ENSG00000160323	ADAMTS13	chr9:136324508:+	0.271835	0.113552	-1.06962	chr9	136324490	A	C	N/A	1	1
g.chr9:137736370A>C	ColoRect-AdenoCA_TCGA	ENSG00000130635	COL5A1	chr9:137736317:+	0.596543	0.102959	-2.55585	chr9	137736370	A	C	N/A	1	1
g.chr9:138386168A>C	ColoRect-AdenoCA_TCGA	ENSG00000196422	C9orf116	chr9:138386185:+	0.66173	0.258605	-1.72424	chr9	138386168	A	C	N/A	1	1
g.chr9:138700352T>G	ColoRect-AdenoCA_TCGA	ENSG00000130559	CAMSAP1	chr9:138700333:-	0.850193	0.197574	-3.13764	chr9	138700352	T	G	N/A	1	1
g.chr9:139296394A>G	ColoRect-AdenoCA_TCGA	ENSG00000165689	SDCCAG3	chr9:139296374:-	0.550973	0.0550265	-3.04795	chr9	139296394	A	G	N/A	1	1
g.chr9:139821837T>C	Skin-Melanoma_ICGC	ENSG00000127191	TRAF2	chr9:139821853:+	0.439966	0.131104	-1.64994	chr9	139821837	T	C	N/A	1	1
g.chr9:140098557T>G	ColoRect-AdenoCA_TCGA	ENSG00000187713	TMEM203	chr9:140098470:-	0.630263	0.085682	-2.90088	chr9	140098557	T	G	N/A	1	1
g.chr9:14613749T>G	ColoRect-AdenoCA_TCGA	ENSG00000175893	ZDHHC21	chr9:14613716:-	0.455283	0.102555	-1.98981	chr9	14613749	T	G	N/A	1	1
g.chr9:15464080T>G	Kidney-RCC_TCGA	ENSG00000164985	SNAPC3	chr9:15464064:-	0.773912	0.0698003	-3.82029	chr9	15464080	T	G	oncogene	1	1
g.chr9:15971879A>G	Liver-HCC_ICGC	ENSG00000164989	CCDC171	chr9:15971961:+	0.615049	0.108109	-2.57879	chr9	15971879	A	G	N/A	1	1
g.chr9:16203954T>C	Lymph-BNHL_ICGC	ENSG00000205549	C9orf92	chr9:16203933:-	0.653651	0.185296	-2.116	chr9	16203954	T	C	N/A	1	1
g.chr9:17503905A>C	Stomach-AdenoCA_TCGA	ENSG00000044459	CNTLN	chr9:17503917:+	0.743371	0.364282	-1.62039	chr9	17503905	A	C	N/A	1	1
g.chr9:19455157A>G	Skin-Melanoma_ICGC	ENSG00000177076	RP11-363E7.4	chr9:19455171:+	0.702779	0.284319	-1.78371	chr9	19455157	A	G	N/A	1	1
g.chr9:20341694T>C	Liver-HCC_ICGC	ENSG00000171843	MLLT3	chr9:20341659:-	0.122688	0.0242278	-1.72851	chr9	20341694	T	C	fusion	1	1
g.chr9:20999538T>C	Bone-Osteosarc_ICGC	ENSG00000188921	PTPLAD2	chr9:20999508:-	0.602219	0.278899	-1.36465	chr9	20999538	T	C	N/A	1	1
g.chr9:21324068T>G	ColoRect-AdenoCA_TCGA	ENSG00000198642	KLHL9	chr9:21324051:-	0.640493	0.133308	-2.44953	chr9	21324068	T	G	N/A	1	1
g.chr9:27547994T>C	Head-SCC_TCGA	ENSG00000147894	C9orf72	chr9:27547966:-	0.332382	0.136893	-1.14391	chr9	27547994	T	C	N/A	1	1
g.chr9:33441176T>C	Lymph-CLL_ICGC	ENSG00000165272	AQP3	chr9:33441216:-	0.426368	0.135575	-1.55585	chr9	33441176	T	C	N/A	1	1
g.chr9:34252506A>C	ColoRect-AdenoCA_TCGA	ENSG00000165006	KIF24	chr9:34252521:+	0.922832	0.330614	-3.18688	chr9	34252506	A	C	N/A	1	1
g.chr9:34634741A>G	Liver-HCC_ICGC	ENSG00000147955	SIGMAR1	chr9:34634689:-	0.757792	0.102381	-3.31166	chr9	34634741	A	G	N/A	1	1
g.chr9:34661860T>A	Head-SCC_TCGA	ENSG00000137070	IL11RA	chr9:34661884:+	0.223794	0.0474021	-1.75684	chr9	34661860	T	A	N/A	1	1
g.chr9:35040550A>C	Kidney-RCC_ICGC	ENSG00000165280	C9orf131	chr9:35040525:-	0.24509	0.0068551	-3.85091	chr9	35040550	A	C	N/A	1	1
g.chr9:36682103A>G	Stomach-AdenoCA_TCGA	ENSG00000165304	MELK	chr9:36682128:+	0.944679	0.178455	-4.36454	chr9	36682103	A	G	N/A	1	1
g.chr9:37506878T>G	Kidney-RCC_ICGC	ENSG00000147912	RP11-613M10.6	chr9:37506852:-	0.245216	0.071088	-1.4458	chr9	37506878	T	G	N/A	1	1
g.chr9:37867277A>C	ColoRect-AdenoCA_TCGA	ENSG00000122741	DCAF10	chr9:37867296:+	0.88785	0.488548	-2.11478	chr9	37867277	A	C	N/A	1	1
g.chr9:37873530A>G	ColoRect-AdenoCA_TCGA	ENSG00000122741	RP11-613M10.9	chr9:37873551:+	0.656502	0.305466	-1.46914	chr9	37873530	A	G	N/A	1	1
g.chr9:37910596T>C	Uterus-AdenoCA_TCGA	ENSG00000107338	RP11-613M10.9	chr9:37910576:-	0.429603	0.0331764	-3.08871	chr9	37910596	T	C	N/A	1	1
g.chr9:3822650T>C	Ovary-AdenoCA_ICGC	ENSG00000107249	GLIS3	chr9:3822630:-	0.63006	0.112804	-2.59489	chr9	3822650	T	C	N/A	1	1
g.chr9:72999537T>G	ColoRect-AdenoCA_TCGA	ENSG00000119138	KLF9	chr9:72999545:-	0.846034	0.613034	-1.24374	chr9	72999537	T	G	N/A	1	1
g.chr9:754396A>C	ColoRect-AdenoCA_TCGA	ENSG00000107104	KANK1	chr9:754410:+	0.623932	0.222531	-1.75725	chr9	754396	A	C	N/A	1	1
g.chr9:77762093A>G	Liver-HCC_ICGC	ENSG00000134996	OSTF1	chr9:77762114:+	0.798569	0.579369	-1.05719	chr9	77762093	A	G	N/A	1	1
g.chr9:80890104A>C	ColoRect-AdenoCA_TCGA	ENSG00000148019	CEP78	chr9:80890119:+	0.217614	0.0741704	-1.2447	chr9	80890104	A	C	N/A	1	1
g.chr9:84198283T>C	Lymph-BNHL_ICGC	ENSG00000196781	TLE1	chr9:84198263:-	0.57888	0.191223	-1.76026	chr9	84198283	T	C	N/A	1	1
g.chr9:86275821T>C	ColoRect-AdenoCA_TCGA	ENSG00000135018	UBQLN1	chr9:86275738:-	0.645101	0.394191	-1.0273	chr9	86275821	T	C	N/A	1	1
g.chr9:86354358T>G	ColoRect-AdenoCA_TCGA	ENSG00000165113	GKAP1	chr9:86354340:-	0.64943	0.143588	-2.40234	chr9	86354358	T	G	N/A	1	1
g.chr9:87638984T>A	Lung-AdenoCA_TCGA	ENSG00000148053	NTRK2	chr9:87639007:+	0.6647	0.29552	-1.55303	chr9	87638984	T	A	N/A	1	1
g.chr9:88159252T>C	Skin-Melanoma_ICGC	ENSG00000135049	AGTPBP1	chr9:88159230:-	0.546237	0.161432	-1.83309	chr9	88159252	T	C	N/A	1	1
g.chr9:88880864T>C	Liver-HCC_ICGC	ENSG00000135070	ISCA1	chr9:88880813:-	0.479609	0.160963	-1.56947	chr9	88880864	T	C	N/A	1	1
g.chr9:91976531T>G	ColoRect-AdenoCA_TCGA	ENSG00000187764	SECISBP2	chr9:91976514:-	0.583514	0.333383	-1.03014	chr9	91976531	T	G	N/A	1	1
g.chr9:94972638T>C	Stomach-AdenoCA_TCGA	ENSG00000196305	IARS	chr9:94972693:-	0.318084	0.0946045	-1.49608	chr9	94972638	T	C	N/A	1	1
g.chr9:96073030T>C	ColoRect-AdenoCA_TCGA	ENSG00000204352	WNK2	chr9:96073012:-	0.476903	0.0801504	-2.34785	chr9	96073030	T	C	N/A	1	1
g.chr9:969069A>G	Skin-Melanoma_ICGC	ENSG00000137090	DMRT1	chr9:969090:+	0.698556	0.328556	-1.55515	chr9	969069	A	G	N/A	1	1
g.chr9:97856609T>C	CNS-Medullo_ICGC	ENSG00000158169	FANCC	chr9:97856587:-	0.365428	0.134153	-1.31284	chr9	97856609	T	C	tsg	1	1
g.chr9:97879946T>C	Liver-HCC_ICGC	ENSG00000148120	FANCC	chr9:97879965:+	0.490696	0.0907298	-2.26754	chr9	97879946	T	C	N/A	1	2
g.chr9:97879948A>C	ColoRect-AdenoCA_TCGA	ENSG00000148120	FANCC	chr9:97879965:+	0.490696	0.149001	-1.70524	chr9	97879948	A	C	N/A	1	2
g.chr9:99793689A>G	Lymph-BNHL_ICGC	ENSG00000136943	CTSV	chr9:99793673:-	0.309838	0.110336	-1.28644	chr9	99793689	A	G	N/A	1	1
g.chrX:100251379A>G	ColoRect-AdenoCA_TCGA	ENSG00000188917	TRMT2B	chrX:100251361:-	0.451056	0.116301	-1.83153	chrX	100251379	A	G	N/A	1	1
g.chrX:100261979T>C	Uterus-AdenoCA_TCGA	ENSG00000188917	TRMT2B	chrX:100261961:-	0.418026	0.1333	-1.54121	chrX	100261979	T	C	N/A	2	2
g.chrX:100261979T>C	Stomach-AdenoCA_ICGC	ENSG00000188917	TRMT2B	chrX:100261961:-	0.418026	0.1333	-1.54121	chrX	100261979	T	C	N/A	2	2
g.chrX:100425349A>C	Uterus-AdenoCA_TCGA	ENSG00000102384	CENPI	chrX:100425372:+	0.276172	0.0686523	-1.64405	chrX	100425349	A	C	N/A	1	1
g.chrX:102751611T>G	Kidney-RCC_ICGC	ENSG00000172476	LL0XNC01-250H12.3	chrX:102751593:-	0.379374	0.172049	-1.07897	chrX	102751611	T	G	N/A	1	1
g.chrX:105452933A>T	Stomach-AdenoCA_TCGA	ENSG00000157502	MUM1L1	chrX:105452949:+	0.609563	0.164287	-2.07214	chrX	105452933	A	T	N/A	1	1
g.chrX:114144610A>T	ColoRect-AdenoCA_TCGA	ENSG00000147246	HTR2C	chrX:114144624:+	0.560827	0.272133	-1.22835	chrX	114144610	A	T	N/A	1	1
g.chrX:114883898A>G	Lung-SCC_TCGA	ENSG00000102024	PLS3	chrX:114883919:+	0.202571	0.0723936	-1.18019	chrX	114883898	A	G	N/A	1	1
g.chrX:119059039T>C	Lung-SCC_TCGA	ENSG00000101882	NKAP	chrX:119059018:-	0.703332	0.145234	-2.63569	chrX	119059039	T	C	N/A	1	1
g.chrX:123235683A>T	Liver-HCC_ICGC	ENSG00000101972	STAG2	chrX:123235700:+	0.764295	0.208864	-2.50816	chrX	123235683	A	T	tsg	1	1
g.chrX:123509770T>G	Panc-AdenoCA_ICGC	ENSG00000009694	TENM1	chrX:123509753:-	0.859817	0.429209	-2.09885	chrX	123509770	T	G	N/A	1	1
g.chrX:128726728A>G	Uterus-AdenoCA_TCGA	ENSG00000122126	OCRL	chrX:128726750:+	0.511911	0.0902843	-2.35782	chrX	128726728	A	G	N/A	1	1
g.chrX:129318829A>C	ColoRect-AdenoCA_TCGA	ENSG00000134594	RAB33A	chrX:129318844:+	0.764889	0.221881	-2.43441	chrX	129318829	A	C	N/A	1	1
g.chrX:132669791A>T	Panc-AdenoCA_ICGC	ENSG00000147257	GPC3	chrX:132669745:-	0.912434	0.774222	-1.11142	chrX	132669791	A	T	both	1	1
g.chrX:14024859T>A	Uterus-AdenoCA_TCGA	ENSG00000046647	GEMIN8	chrX:14024845:-	0.327882	0.0935573	-1.55317	chrX	14024859	T	A	N/A	1	1
g.chrX:147032136A>G	ColoRect-AdenoCA_TCGA	ENSG00000102081	FMR1	chrX:147032158:+	0.851618	0.223165	-2.99466	chrX	147032136	A	G	N/A	1	1
g.chrX:151121615T>C	Liver-HCC_ICGC	ENSG00000102287	GABRE	chrX:151121596:-	0.964582	0.721235	-2.35388	chrX	151121615	T	C	N/A	1	1
g.chrX:153166183T>G	ColoRect-AdenoCA_TCGA	ENSG00000089820	ARHGAP4	chrX:153166162:-	0.676509	0.220812	-1.99871	chrX	153166183	T	G	N/A	1	1
g.chrX:153213028T>A	Skin-Melanoma_ICGC	ENSG00000172534	HCFC1	chrX:153213008:-	0.783661	0.0700408	-3.87319	chrX	153213028	T	A	N/A	1	1
g.chrX:153576914T>G	ColoRect-AdenoCA_TCGA	ENSG00000196924	FLNA	chrX:153576949:-	0.364806	0.0436003	-2.53355	chrX	153576914	T	G	other	1	1
g.chrX:154005836A>G	Lymph-BNHL_ICGC	ENSG00000130826	DKC1	chrX:154005855:+	0.577427	0.152162	-2.02996	chrX	154005836	A	G	N/A	1	1
g.chrX:154289916T>C	Eso-AdenoCa_ICGC	ENSG00000182712	CMC4	chrX:154289897:-	0.511547	0.215084	-1.34074	chrX	154289916	T	C	N/A	1	1
g.chrX:154351578A>C	ColoRect-AdenoCA_TCGA	ENSG00000185515	MTCP1	chrX:154351605:+	0.538947	0.09456	-2.41529	chrX	154351578	A	C	N/A	1	1
g.chrX:154356737A>G	Liver-HCC_TCGA	ENSG00000185515	MTCP1	chrX:154356758:+	0.183317	0.0694937	-1.10046	chrX	154356737	A	G	N/A	1	1
g.chrX:16864060A>C	ColoRect-AdenoCA_TCGA	ENSG00000086712	RBBP7	chrX:16864081:+	0.373158	0.173186	-1.04452	chrX	16864060	A	C	N/A	1	1
g.chrX:18907381T>C	Liver-HCC_ICGC	ENSG00000044446	PHKA2-AS1	chrX:18907364:-	0.0684853	0.00378255	-2.96337	chrX	18907381	T	C	N/A	1	1
g.chrX:19552114T>C	Liver-HCC_ICGC	ENSG00000147010	SH3KBP1	chrX:19552095:-	0.549784	0.299342	-1.05023	chrX	19552114	T	C	N/A	1	1
g.chrX:30845580T>G	Skin-Melanoma_TCGA	ENSG00000157625	TAB3	chrX:30845559:-	0.385459	0.0866263	-1.8891	chrX	30845580	T	G	N/A	1	1
g.chrX:37698110T>G	ColoRect-AdenoCA_TCGA	ENSG00000165169	DYNLT3	chrX:37698089:-	0.802033	0.293861	-2.27576	chrX	37698110	T	G	N/A	1	1
g.chrX:37698334T>C	Breast-AdenoCa_TCGA	ENSG00000165169	DYNLT3	chrX:37698315:-	0.78402	0.323224	-2.02824	chrX	37698334	T	C	N/A	1	1
g.chrX:38548154A>G	Skin-Melanoma_ICGC	ENSG00000156298	TSPAN7	chrX:38548103:+	0.837365	0.174379	-3.19365	chrX	38548154	A	G	N/A	1	1
g.chrX:41091979A>G	Stomach-AdenoCA_TCGA	ENSG00000124486	USP9X	chrX:41092051:+	0.291499	0.10064	-1.30202	chrX	41091979	A	G	fusion	1	1
g.chrX:46952691A>G	Stomach-AdenoCA_TCGA	ENSG00000130988	RGN	chrX:46952710:+	0.660347	0.297528	-1.52394	chrX	46952691	A	G	N/A	1	1
g.chrX:47089375A>G	ColoRect-AdenoCA_TCGA	ENSG00000102225	CDK16	chrX:47089396:+	0.25888	0.0304524	-2.40887	chrX	47089375	A	G	N/A	1	1
g.chrX:48439528A>C	ColoRect-AdenoCA_TCGA	ENSG00000102317	RBM3	chrX:48439550:+	0.941809	0.409712	-3.14923	chrX	48439528	A	C	N/A	1	1
g.chrX:54594322A>C	ColoRect-AdenoCA_TCGA	ENSG00000130119	GNL3L	chrX:54594351:+	0.412436	0.191766	-1.08467	chrX	54594322	A	C	N/A	1	1
g.chrX:54618355A>T	Skin-Melanoma_TCGA	ENSG00000130119	GNL3L	chrX:54618377:+	0.847539	0.610739	-1.26501	chrX	54618355	A	T	N/A	1	1
g.chrX:54959610T>C	Skin-Melanoma_TCGA	ENSG00000158571	PFKFB1	chrX:54959589:-	0.0559031	0.00942674	-1.82812	chrX	54959610	T	C	N/A	1	1
g.chrX:56311641A>T	Panc-AdenoCA_ICGC	ENSG00000102349	KLF8	chrX:56311661:+	0.307341	0.0119899	-3.59905	chrX	56311641	A	T	N/A	1	1
g.chrX:64137662T>C	Stomach-AdenoCA_TCGA	ENSG00000126970	ZC4H2	chrX:64137620:-	0.0934104	0.018746	-1.68517	chrX	64137662	T	C	N/A	1	1
g.chrX:65241602A>G	Lung-SCC_TCGA	ENSG00000155659	VSIG4	chrX:65241580:-	0.825636	0.0936199	-3.82523	chrX	65241602	A	G	N/A	1	1
g.chrX:70520997A>C	ColoRect-AdenoCA_TCGA	ENSG00000147140	NONO	chrX:70521018:+	0.881385	0.437994	-2.25492	chrX	70520997	A	C	fusion	1	1
g.chrX:79931364T>A	Uterus-AdenoCA_TCGA	ENSG00000165288	BRWD3	chrX:79931316:-	0.237971	0.080864	-1.26683	chrX	79931364	T	A	N/A	1	1
g.chrX:84531919A>T	Lymph-BNHL_ICGC	ENSG00000124429	POF1B	chrX:84531902:-	0.416075	0.119332	-1.65986	chrX	84531919	A	T	N/A	1	1
g.chrX:90692682A>C	ColoRect-AdenoCA_TCGA	ENSG00000174740	PABPC5	chrX:90692702:+	0.635488	0.0344196	-3.88994	chrX	90692682	A	C	N/A	1	1
g.chrY:16955811A>C	ColoRect-AdenoCA_TCGA	ENSG00000165246	NLGN4Y	chrY:16955850:+	0.512012	0.145759	-1.81632	chrY	16955811	A	C	N/A	1	1
